# Supplementary material for: Whole genome sequencing of a banana wild relative Musa itinerans provides insights into lineage-specific diversification of the Musa genus
Source: PubMed Central journal article supplement (PMC4987669; doi:10.1038/srep31586), 2016-08-17
Supplement: srep31586-s1.pdf [file srep31586-s1.pdf]

## Supplementary Information

### **Whole genome sequencing of a banana wild relative *Musa itinerans* provides insights into lineage-specific diversification of the *Musa* genus**

Wei Wu<sup>1,\*</sup>, Yu-Lan Yang<sup>2,\*</sup>, Wei-Ming He<sup>2</sup>, Mathieu Rouard<sup>3,4</sup>, Wei-Ming Li<sup>5</sup>, Meng Xu<sup>2</sup>, Nicolas Roux<sup>3,4</sup>, Xue-Jun Ge<sup>1,†</sup>

1. Key Laboratory of Plant Resources Conservation and Sustainable Utilization, South China Botanical Garden, the Chinese Academy of Sciences, Guangzhou 510650, China;

2. BGI-Shenzhen, Shenzhen 518083, China

3. Bioversity International, Parc Scientifique Agropolis II, 34397 Montpellier Cedex 5, France

4. CGIAR Research Program on Roots, Tubers and Bananas (RTB)

5. Key Laboratory of Tropical Fruit Biology, Ministry of Agriculture, South Subtropical Crops Research Institute, Chinese Academy of Tropical Agricultural Sciences, Zhanjiang 524091, China

†Correspondence and requests for materials should be addressed to G. X (email: [xjge@scbg.ac.cn](mailto:xjge@scbg.ac.cn))

\*These authors contributed equally to this work.

## Contents

|                                                                                                                                                                                              |    |
|----------------------------------------------------------------------------------------------------------------------------------------------------------------------------------------------|----|
| Supplementary Information .....                                                                                                                                                              | 1  |
| Supplementary Notes .....                                                                                                                                                                    | 5  |
| Supplementary Note 1. Plant materials .....                                                                                                                                                  | 5  |
| Supplementary Note 2. Reads quality control.....                                                                                                                                             | 5  |
| Supplementary Note 3. Genome assembly .....                                                                                                                                                  | 6  |
| Supplementary Note 4 Estimation of the genome size and heterozygosity .....                                                                                                                  | 6  |
| Supplementary Note 5. The source origin of the used genomic data in this study.....                                                                                                          | 7  |
| Supplementary Figures .....                                                                                                                                                                  | 8  |
| Supplementary Figure 1. Morphological characters of <i>Musa itinerans</i> and sampling locations.....                                                                                        | 8  |
| Supplementary Figure 2. 17-mer-based analysis to estimate the genome size in <i>Musa itinerans</i> .....                                                                                     | 9  |
| Supplementary Figure 3. Sequencing depth distribution of the <i>Musa itinerans</i> genome....                                                                                                | 10 |
| Supplementary Figure 4. GC content in the genome of <i>Musa itinerans</i> .....                                                                                                              | 11 |
| Supplementary Figure 5. Divergence rate distribution of classified transposable element (TE) families in <i>Musa itinerans</i> genome.....                                                   | 12 |
| Supplementary Figure 6. The insertion time distributions of long terminal repeat (LTR) retrotransposons in the genomes <i>Musa itinerans</i> and <i>Musa acuminata</i> .....                 | 13 |
| Supplementary Figure 7. Gene family clustering of nine sequenced plant genomes. ....                                                                                                         | 14 |
| Supplementary Figure 8. Phylogenetic relationships of <i>Musa itinerans</i> and other eight species based on four-fold degenerated transversion sites (4DTvs) using MrBayesian methods ..... | 15 |
| Supplementary Figure 9. Syntenic dotplots between <i>Musa itinerans</i> - <i>Musa acuminata</i> comparison. ....                                                                             | 16 |
| Supplementary Figure 10. Intragenomic syntenic blocks of <i>Musa acuminata</i> . Chromosomes are represented as colored blocks. ....                                                         | 18 |
| Supplementary Figure 11. The distribution of NBS-encoding genes for <i>Musa acuminata</i> , <i>Musa itinerans</i> , <i>Musa balbisiana</i> along chromosomes. ....                           | 19 |
| Supplementary Figure 12. Maximum likelihood phylogenetic analysis of the NBS-encoding super gene family of <i>Musa</i> species.....                                                          | 20 |

|                                                                                                                                                                                                                         |    |
|-------------------------------------------------------------------------------------------------------------------------------------------------------------------------------------------------------------------------|----|
| Supplementary Figure 13. Age and selection intensities of NBS-LRR gene families with different duplicated modes hosted in two <i>Musa</i> species .....                                                                 | 21 |
| Supplementary Figure 14. Hierarchical clustering of 58 transcription factors (TFs) among <i>Musa itinerans</i> and other five species.....                                                                              | 22 |
| Supplementary Figure 15. DNA-binding domains of R2R3-MYB transcription factor proteins in <i>Musa acuminata</i> , and <i>Musa itinerans</i> .....                                                                       | 23 |
| Supplementary Figure 16. Collinearity mapping the orthologs MYB gene pairs between <i>Musa itinerans</i> and <i>M. acuminata</i> .....                                                                                  | 24 |
| Supplementary Tables.....                                                                                                                                                                                               | 25 |
| Supplementary Table 1 Summaries of reads used for <i>Musa itinerans</i> genome assembly...                                                                                                                              | 25 |
| Supplementary Table 2 Genome size estimation of <i>Musa itinerans</i> with the 17-mer analysis.....                                                                                                                     | 26 |
| Supplementary Table 3 Statistics of the assembly of the <i>Musa itinerans</i> genome.....                                                                                                                               | 27 |
| Supplementary Table 4. The completeness of <i>Musa acuminata</i> and <i>Musa itinerans</i> genome assemblies evaluated with coverage of the conserved 248 core eukaryote gene (CEGs) with CEGMA program. ....           | 28 |
| Supplementary Table 5 Comparison of repeat contents in the assembled genomes of <i>Musa itinerans</i> and <i>Musa. acuminata</i> .....                                                                                  | 29 |
| Supplementary Table 6 Homology-based gene prediction for <i>Musa itinerans</i> genome ...                                                                                                                               | 30 |
| Supplementary Table 7 Gene functional annotations based on different protein database for <i>Musa itinerans</i> genome.....                                                                                             | 31 |
| Supplementary Table 8 Non-coding RNA genes in the <i>Musa itinerans</i> genome.....                                                                                                                                     | 32 |
| Supplementary Table 9. Gene family clustering among <i>Musa itinerans</i> and other eight related species.....                                                                                                          | 33 |
| Supplementary Table 10. Gene ontology (GO) enrichment analysis of <i>Musa itinerans</i> unique gene families among five species <sup>a</sup> and shown for significantly <sup>b</sup> represented GO terms.....         | 34 |
| Supplementary Table 11. KEGG pathway enrichment analysis of <i>Musa itinerans</i> unique gene families among five species <sup>a</sup> and shown for significantly <sup>b</sup> represented pathways.....               | 36 |
| Supplementary Table 12. KEGG pathway enrichment analysis of expanded gene families for ancestral <i>Musa</i> species among nine species <sup>a</sup> and shown for significantly <sup>b</sup> represented pathways..... | 37 |
| Supplementary Table 13. KEGG pathway enrichment analysis of contracted ancestral <i>Musa</i> gene families among nine species <sup>a</sup> and shown for significantly <sup>b</sup> represented pathways...             | 39 |

|                                                                                                                                                                                                                  |    |
|------------------------------------------------------------------------------------------------------------------------------------------------------------------------------------------------------------------|----|
| Supplementary Table 14. KEGG pathway enrichment analysis of <i>Musa itinerans</i> .....                                                                                                                          | 40 |
| expanded gene families among nine species <sup>a</sup> and shown for significantly <sup>b</sup> represented ....                                                                                                 | 40 |
| pathways.....                                                                                                                                                                                                    | 40 |
| Supplementary Table 15. KEGG pathway enrichment analysis of <i>Musa itinerans</i> contracted<br>gene families among nine species <sup>a</sup> and shown for significantly <sup>b</sup> represented pathways .... | 41 |
| Supplementary Table 16. Overview of <i>Musa itinerans</i> pseudo-chromosomes based on<br>syntenic blocks between <i>M. itinerans</i> and <i>Musa acuminata</i> .....                                             | 42 |
| Supplementary Table 17 Classifications* of NBS-containing Resistances in three <i>Musa</i><br>species <i>M. acuminata</i> , <i>M. balbisiana</i> , and <i>M. itinerans</i> .....                                 | 43 |
| Supplementary Table 18 Genome-wide duplication modes and ages of NBS-encoding<br>genes in <i>Musa itinerans</i> .....                                                                                            | 44 |
| Supplementary Table 19 Genome-wide duplication modes and ages NBS-encoding genes<br>in <i>Musa acuminata</i> .....                                                                                               | 45 |
| Supplementary Table 20. Transcription factors across two <i>Musa</i> genomes and other related<br>species .....                                                                                                  | 47 |
| Supplementary Table 21 List of MYB transcription factor genes for two <i>Musa</i> species.....                                                                                                                   | 50 |
| Supplementary Table 22. Genome-wide duplication modes and ages MYB transcription<br>gene family in <i>Musa acuminata</i> .....                                                                                   | 63 |
| Supplementary Table 23 Genome-wide duplication modes and ages of MYB transcription<br>gene family in <i>Musa itinerans</i> .....                                                                                 | 77 |

## Supplementary Notes

### Supplementary Note 1. Plant materials

One individual used for draft genome assembly was a transplant in South China Botanical Garden, Guangzhou, Guangdong, which were sampled from Wuzhishan Mountain, Baoting, Hainan island (detailed GPS information were not available, and the population designated as HN); the other two individuals used for high depth sequencing were sampled from Jiufeng, Lechang, Guangdong province (25°20' 50.09N, 113°21' 03.34E, alt. 490m. and the population was designated as LC), and Baiyong Nature Conserve, Yangchun, Guangdong province (22°23'46.09N, 111°39'54.04E, alt. 90m, and the population was designated as YC). Fresh leaves were harvested and stored and dried in silica-gel for DNA extraction.

### Supplementary Note 2. Reads quality control

The short-read assembly algorithm was sensitive to sequencing errors, we took stringent measures to check and filter the short reads generated by the Illumina Hiseq2000 platforms, including steps:

- (1) Remove of adapter contamination. DNA adaptor dimers, empty loading or too small insert sizes (less than the read length) will lead to adapter contamination, and it was library specific. For pair-end reads, If Read1 contains a 3'-adaptor, then Read2 should contain a 5'-adaptor. The reads were filtered at a threshold when both Read1 and Read2 contained adapters 10 bp and with a mismatch rate  $\leq 0.1$ .
- (2) Deduplication of redundant reads. Base-calling duplicates were filtered with a threshold of Euclidean distance  $\leq 3$  and mismatch rate  $\leq 0$ . Euclidean distance between two reads in the same tile were calculated following formula:  
$$\sqrt{(X_1 - X_2)^2 + (Y_1 - Y_2)^2}$$
, where 'X' and 'Y' were coordinates recorded in the sequence identifier of the fastq format files.
- (3) Low quality reads trimmed or discarded. Low quality sequences at the 3'-end were trimmed for some reads. Individual reads in all lanes were filtered with an

excess (> 10%) of 'N's and where > 40% of the bases had a PHRED quality score below Q7.

### **Supplementary Note 3. Genome assembly**

A total of 74.2Gb (about 120.7-fold sequencing depth) qualified reads were used for genome assembly after the quality control and filtering. Using SOAPdenovo v 2.0, the reads from short insert size libraries (170bp and 500 bp) were split into 31-mers to construct a de Bruijn graph. Contigs were obtained for those reads exhibited unambiguous connections in the *de* Bruijn graphs. Considering contigs with length  $\geq$  100 bp, the N50 and N90 contig size was 33,903 bp and 3,668 bp, respectively.

Reads of mate-pair libraries ( $\geq$ 2kb) were aligned on the contigs to build scaffolds using the pair-end information. Contigs were linked into scaffolds sequentially from short to long insert sizes. For each contig pair, at least three paired-end reads anchored on it. For the same insert libraries, conflicting connections with more than one other contig at the 3' or 5' end were omitted from scaffold construction. Finally, the read pairs mapped to the local region around gaps were retrieved and carried out a local assembly to fill the gaps. Using all short and long insert size libraries, we obtained scaffolds N50 of 192,092 bp and N90 of 19,491 bp length.

### **Supplementary Note 4 Estimation of the genome size and heterozygosity**

Using the filtered reads from the short insert size libraries (170 bp and 500 bp), the genome size  $G$  was estimated as  $G = K\_num / K\_depth$ , where  $K\_num$  was the total number of  $K$ -mers, and  $K\_depth$  is the overall depth estimated from the  $k$ -mer distribution. In our 17-mer analysis, the  $k$ mer number was 14,764,273,540. By plotting the occurrence of  $k$ -mers against the percentage of corresponding  $k$ -mers, the  $K$ -depth was 24 (Supplementary Figure S1), so the genome size of *M. itinerans* was about 615Mb.

To estimate the heterozygosity rate of *Musa itinerans*, all high quality reads were mapped to the genome assembly to call heterozygous SNPs using the software

SOAP2 (<http://soap.genomics.org.cn/soapaligner.html>) with the cutoff less than 5 mismatches. Next, SNP mining conducted upon the alignment results using the SOAPsnp (<http://soap.genomics.org.cn/soapsnp.html>). The effective sites were determined by criterion: quality score of consensus genotype over 20; all the mapped best and second best base covered by at least 4 unique reads; sequencing depth is more than 10-fold; and SNPs interval are at least 5 bp. Finally, the rate of the heterozygosity was estimated as the number of heterozygotic sites divided by the number of criterion effective sites.

#### **Supplementary Note 5. The source origin of the used genomic data in this study**

In this study, we used the genome data of other eight related species. The genome resources of these species as following: *Arabidopsis thaliana* TAIR v10 (<ftp://ftp.arabidopsis.org>), *Vitis vinifera* Genoscope.12X (<http://www.genoscope.cns.fr/externe/GenomeBrowser/Vitis/>), *Oryza sativa* IRGSP-1.0 (<http://rapdb.dna.affrc.go.jp/download/irgsp1.html>), *Sorghum bicolor* v3.1 (<https://phytozome.jgi.doe.gov/pz/portal.html>), *Phoenix dactylifera* DPV01 ([ftp://ftp.ncbi.nih.gov/genomes/Phoenix\\_dactylifera/protein/](ftp://ftp.ncbi.nih.gov/genomes/Phoenix_dactylifera/protein/)), *Elaeis guineensis* EG5.Genes.V2 (<http://genomsawit.mpob.gov.my/genomsawit/>), *M. acuminata* v1.0 and *M. balbisiana* (<http://banana-genome.cirad.fr/>).

## Supplementary Figures

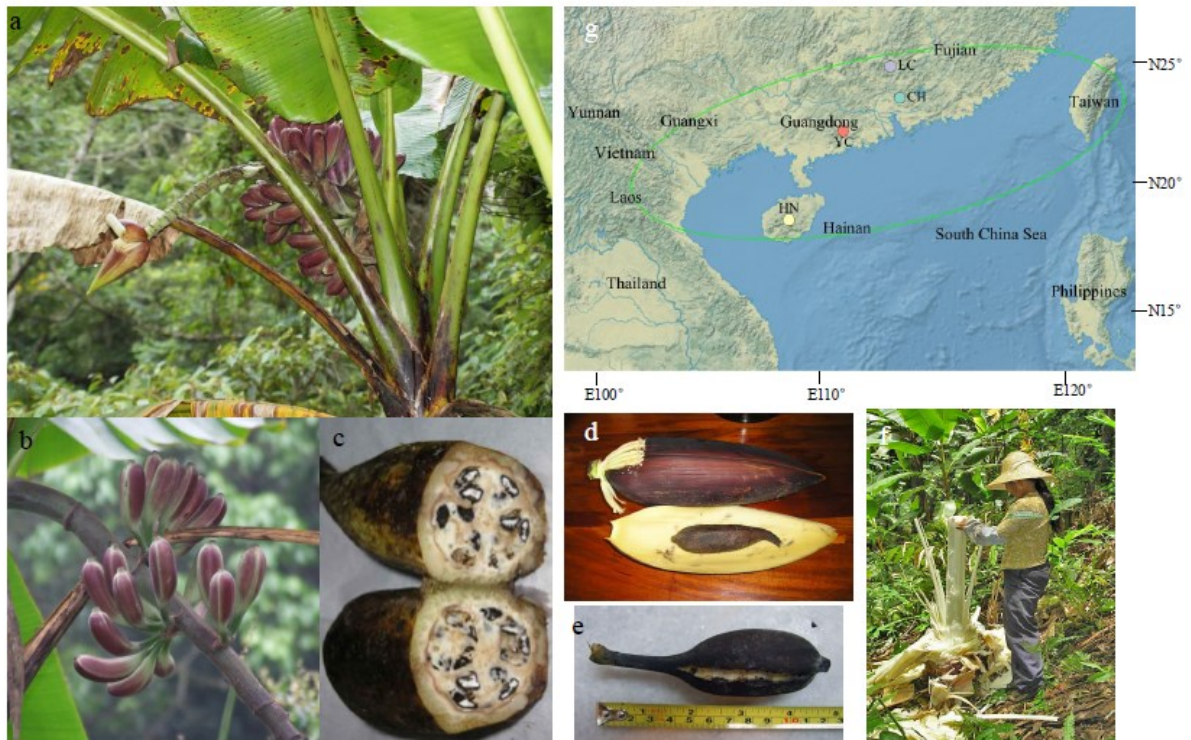

**Supplementary Figure 1. Morphological characters of *Musa itinerans* and sampling locations.** a. whole plant architectures; b. fruits; c. seeds; d. flowers and bracts; e. finger size; f. farmers harvesting the pseudo-stems for livestock food; g. sample locations of the *Musa itinerans* used in this study, LC, Lecang, Guangdong, CH, Conghua, Guangdong, YC, Guangdong, HN, Hainan, and the distributions of *Musa itinerans* outlined by green circle; The photographs of figures (a, b, c, d, e, f) were taken by Dr Ge, and the map (figure g) was generated with GenGIS 2.4.1([http://kiwi.cs.dal.ca/GenGIS/Main\\_Page](http://kiwi.cs.dal.ca/GenGIS/Main_Page)) and manually modified.



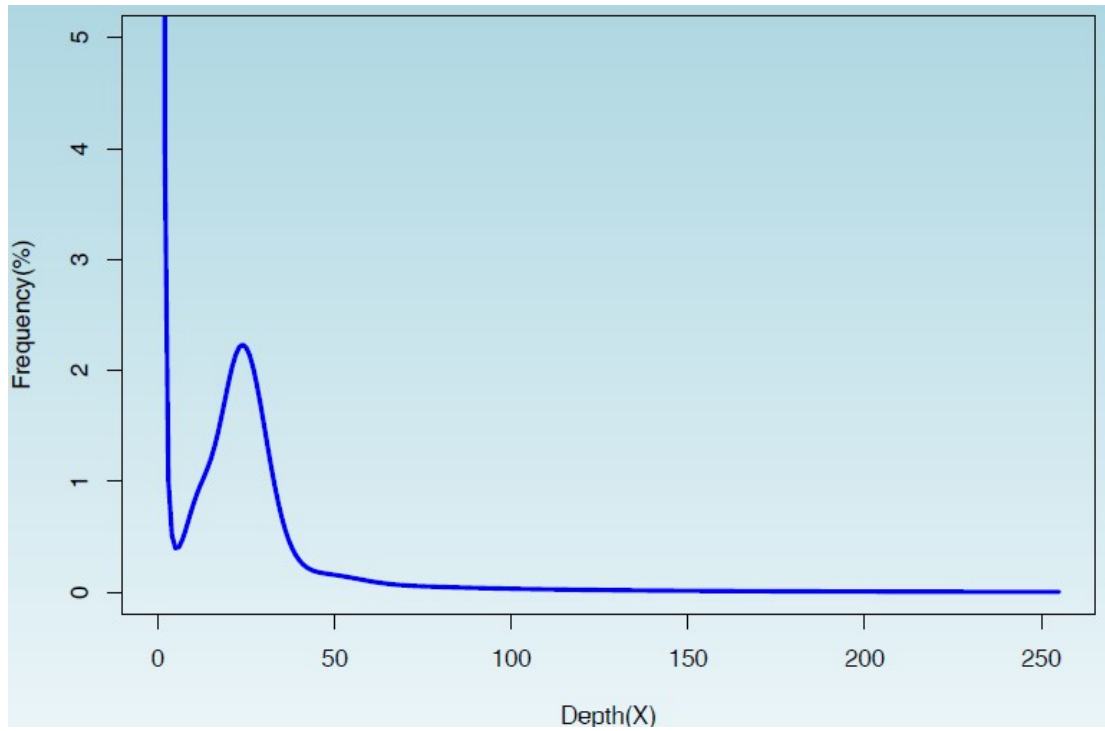

**Supplementary Figure 2. 17-mer-based analysis to estimate the genome size in *Musa itinerans*.** The X-axis is the depth of K-mers derived from the sequenced reads and Y-axis is the frequency of K-mer depth. One peak occurred at depth about 24-fold.

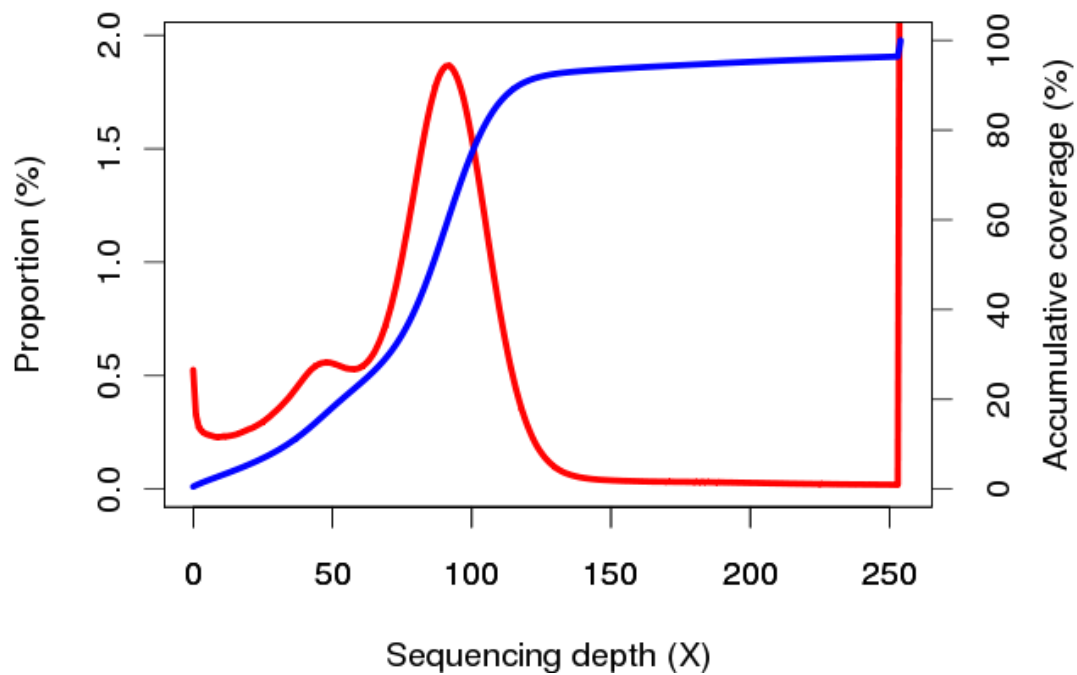

**Supplementary Figure 3. Sequencing depth distribution of the *Musa itinerans* genome.** Using SOAPaligner, all reads of the small insertion libraries were mapped back to the assembled genome, the proportions of the different base coverage to the genome were summarized using Soapcoverage v2.27; red curve represented the proportions of sequential base sequencing depths to the whole genomes, a peak at about 92 fold gave the average base sequencing depth, and minor peak at about 48 fold caused by heterozygosity; and blue curve depicted the distribution of accumulative base coverage.

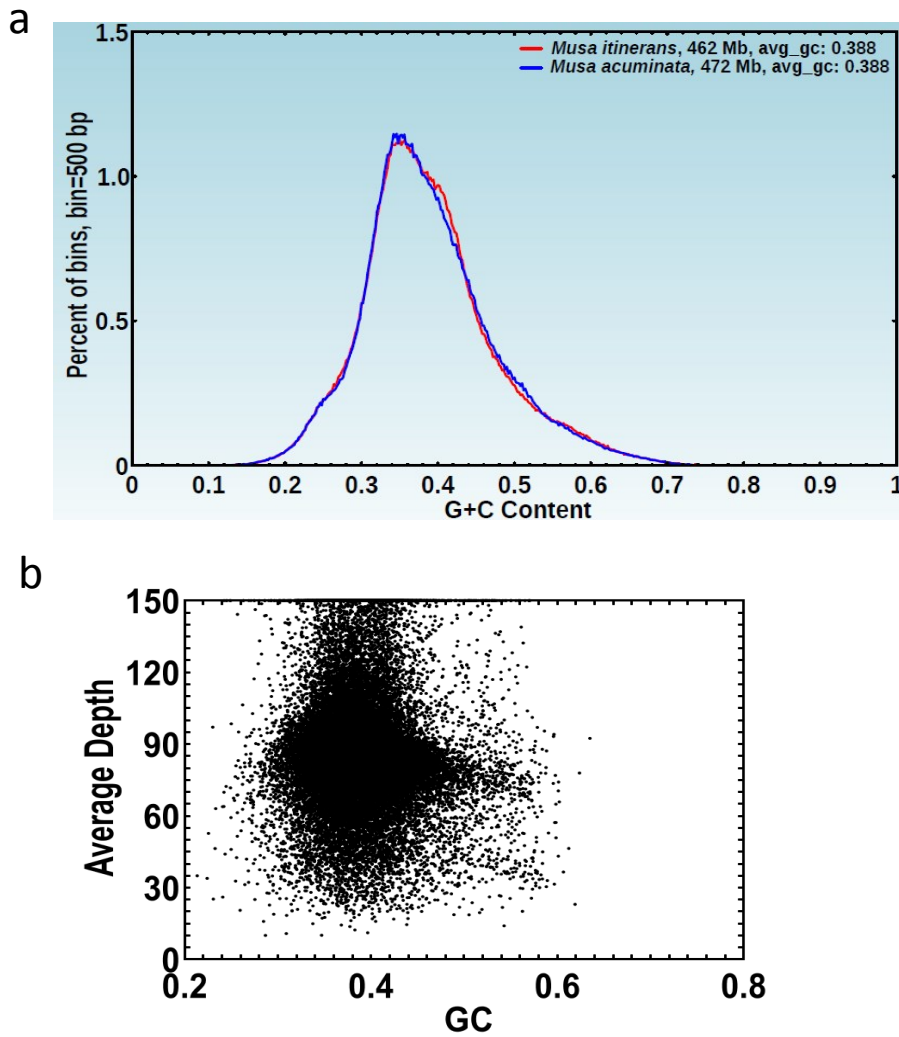

**Supplementary Figure 4. GC content in the genome of *Musa itinerans*.**

(a) GC content distributions of the genomes for two *Musa* species, blue and red curves represent the *M. acuminata* and *M. itinerans*, respectively. The x-axis is GC content and the y-axis is the proportion of the bin number with the specified GC. Each bin has a window size of 500bp (with 250bp overlap) sliding along the genome; (b) The sequencing depth and GC content for 10 kb non-overlapping sliding windows along the genome.

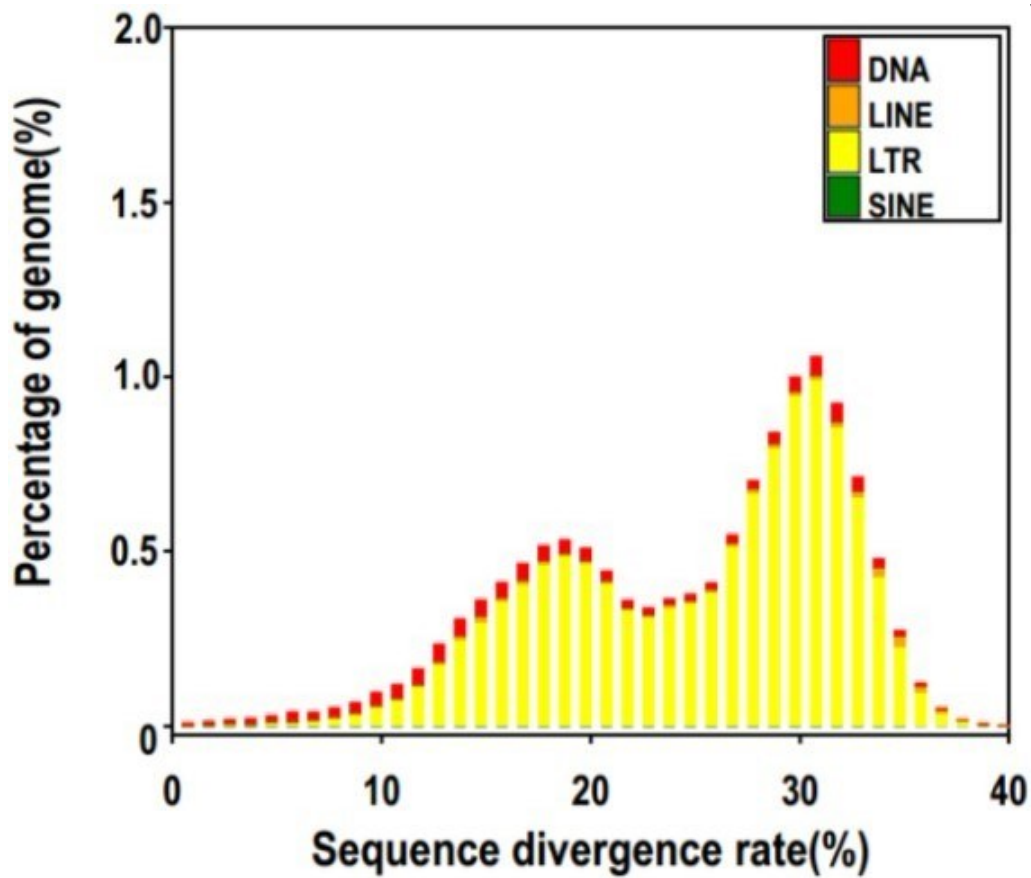

**Supplementary Figure 5. Divergence rate distribution of classified transposable element (TE) families in *Musa itinerans* genome.** The different classified TE families in the *M. itinerans* genome were aligned to the consensus sequences in the Repbase (v15.02) library. The sequence divergence rates of TEs were counted.

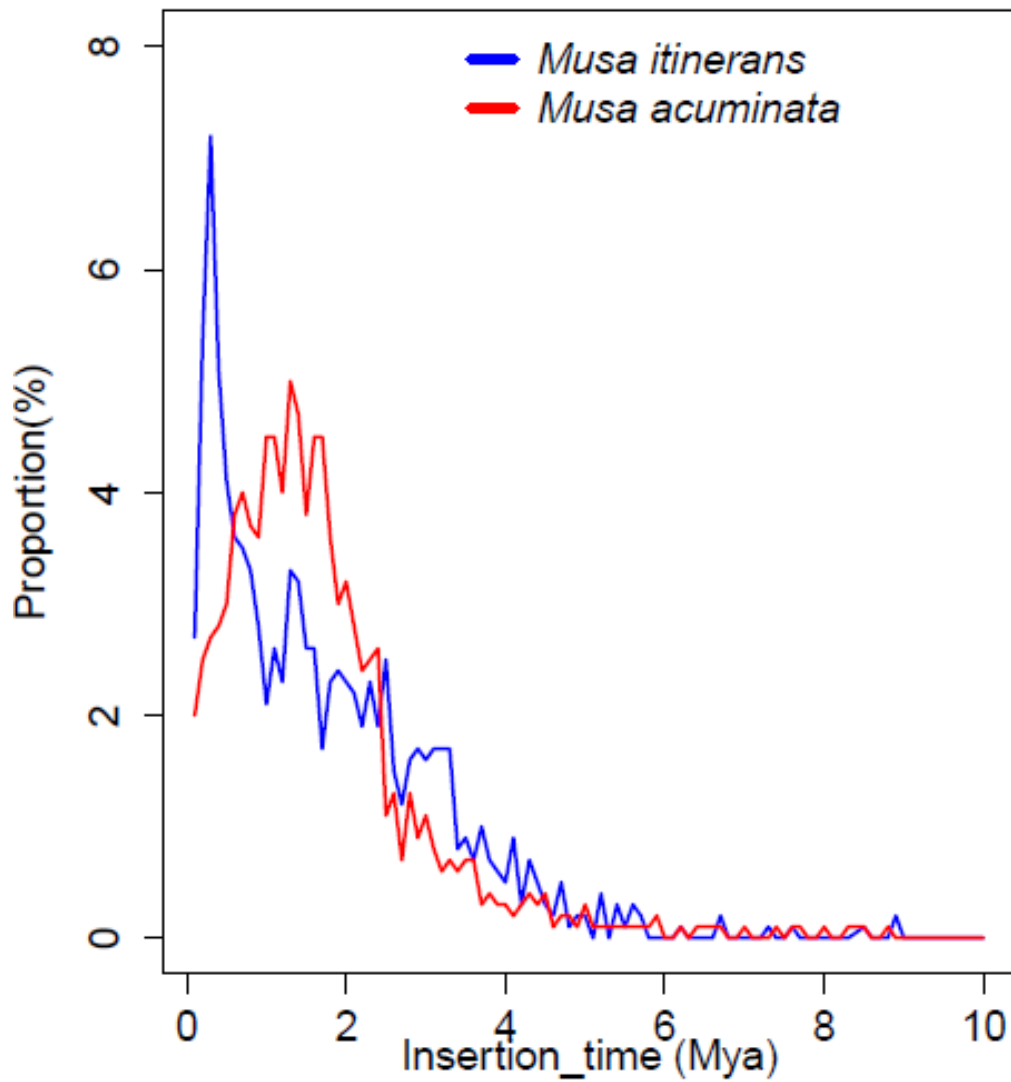

**Supplementary Figure 6. The insertion time distributions of long terminal repeat (LTR) retrotransposons in the genomes *Musa itinerans* and *Musa acuminata*.**

Only sequences with intact 5' and 3' LTR were used to calculate the K-value (the average number of substitutions per aligned site) according to the formula:  $T = K / (2 * r)$ , implemented in MEGA. T denotes the insertion time, r is the average substitute rate for a given value  $1.3 \times 10^{-8}$  substitutions per synonymous site per year.

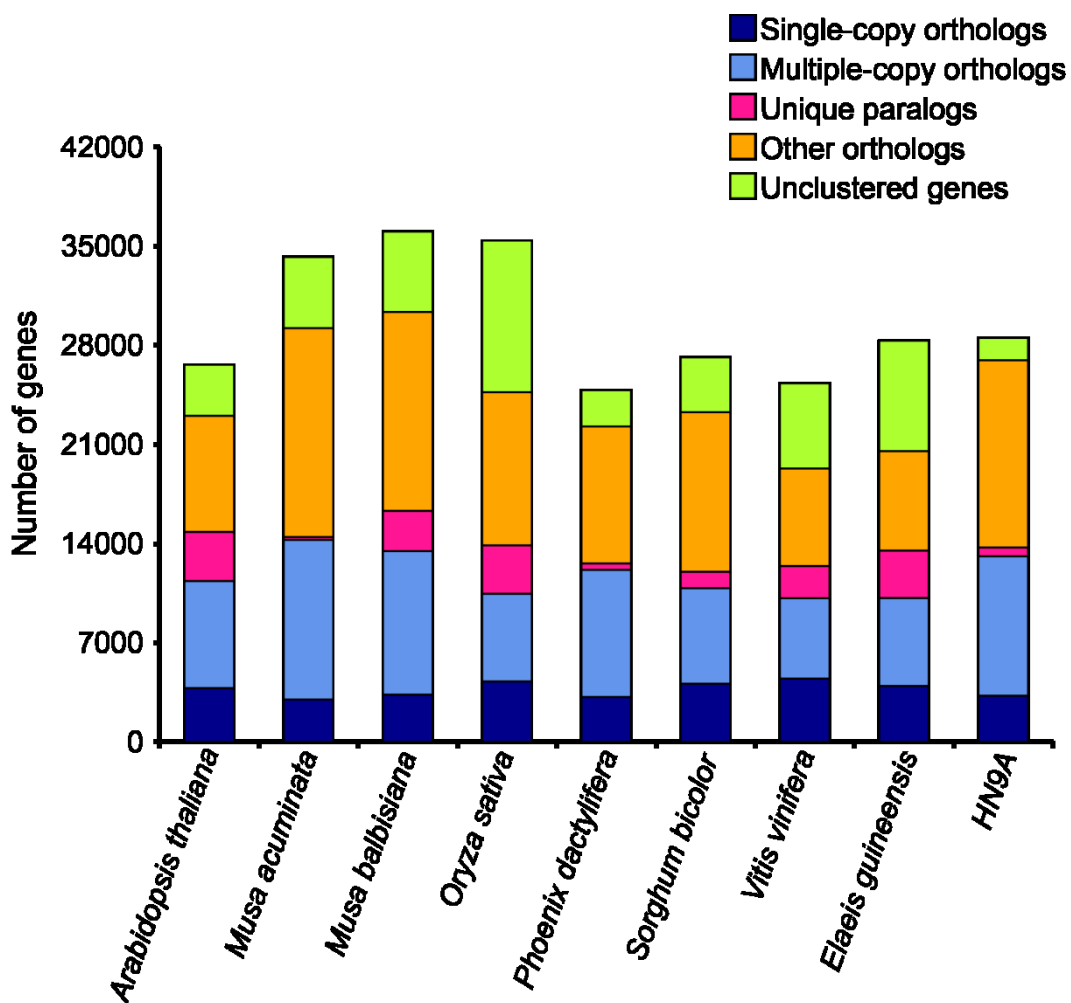

**Supplementary Figure 7. Gene family clustering of nine sequenced plant genomes.** The genes from nine sequenced plant genomes were aligned to each other using BLASTP with cut-off e value of  $1e-5$ . Pairwise similarity of protein sequences was used to clustering all the genes. HN9A denotes the genome *Musa itinerans* in this study.

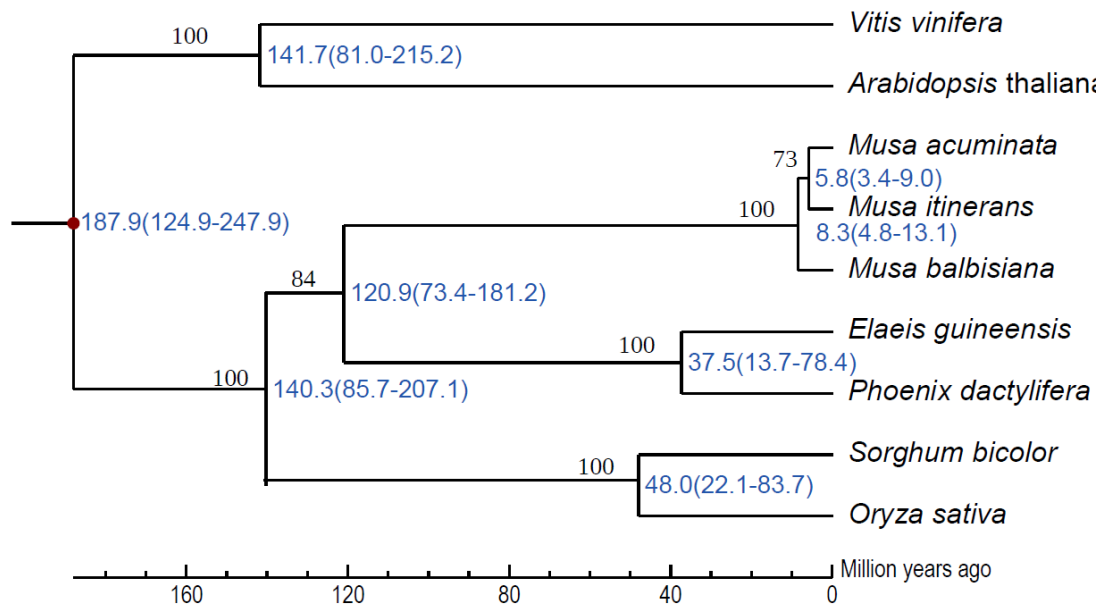

**Supplementary Figure 8. Phylogenetic relationships of *Musa itinerans* and other eight species based on four-fold degenerated transversion sites (4DTvs) using MrBayesian methods.** The numbers on the branch were bootstrap values, and the values at the node indicated the estimates of divergence time with a 95% credibility interval. A calibrated time of 141.7 (95% credibility interval: 81.0 ~215.2 MYA) for the ancestral node of *Vitis vinifera* and *Arabidopsis thaliana* was used

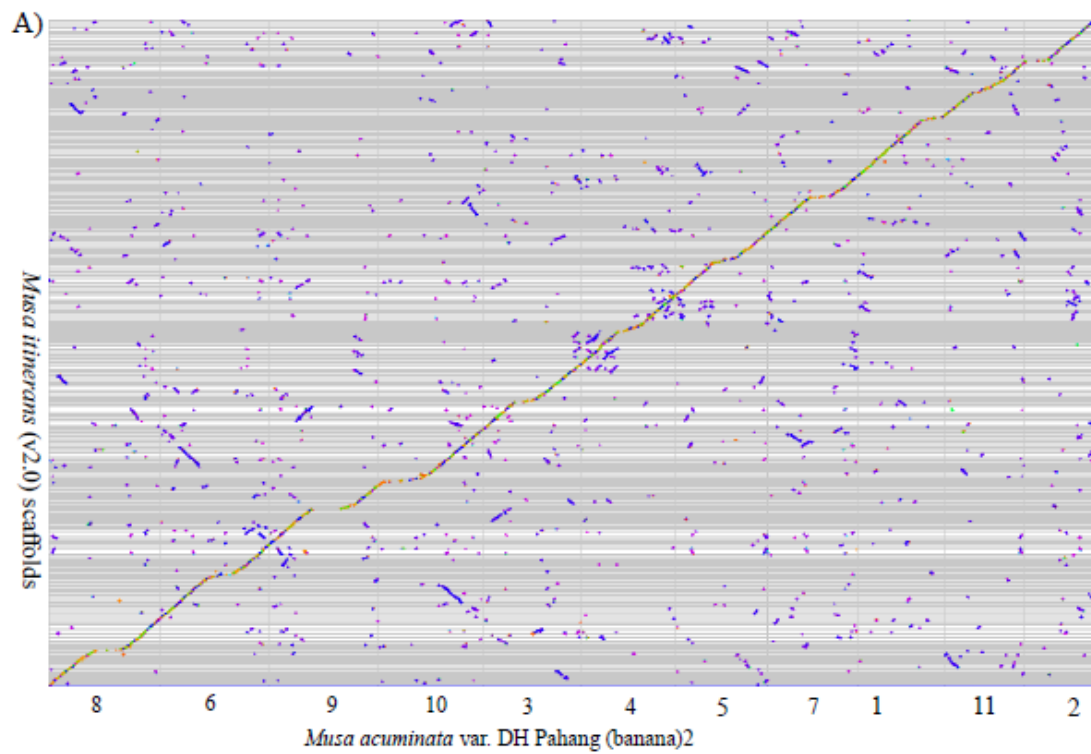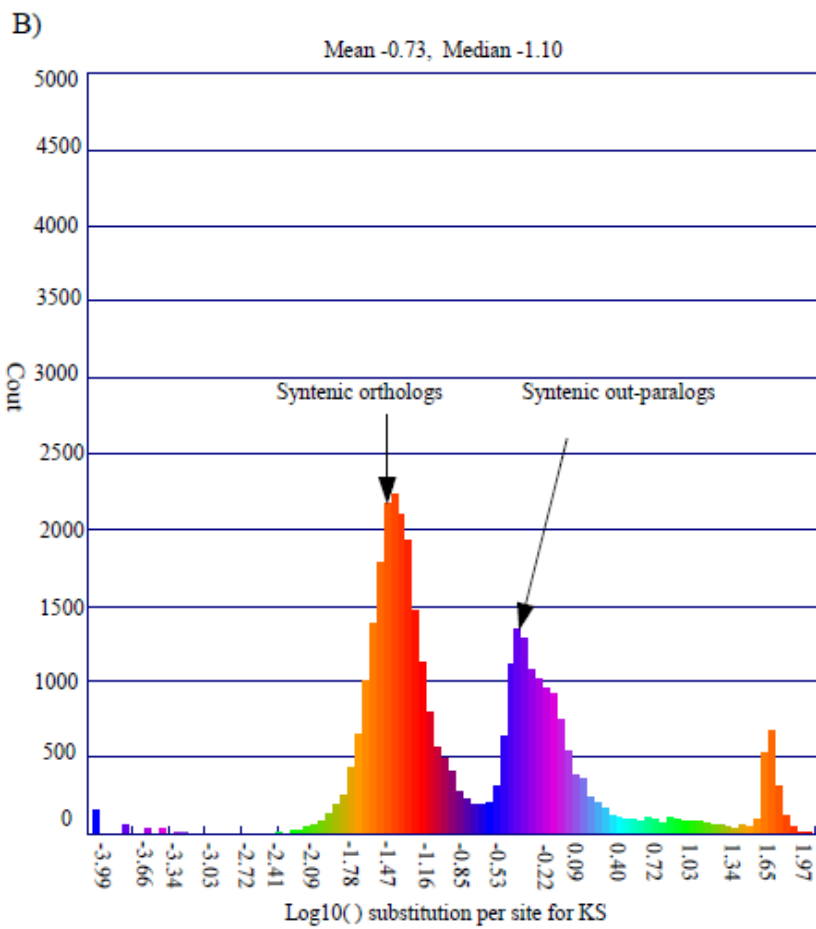

**Supplementary Figure 9. Syntenic dotplots between *Musa itinerans*-*Musa acuminata* comparison.** Syntenic gene pairs screened for a 3:3 syntenic depth.



(A) *Musa acuminata* is on the x-axis, and *M. itinerans* was on the y-axis. Horizontal and vertical gray lines separate chromosomes or scaffolds. Colored dots/lines were syntenic gene pairs through collinearity, and different colors corresponding to their  $K_s$  value shown in (B); (B) Synonymous rate value histogram of syntenic gene pairs. Values have been log10 transformed and colors on histogram match the syntenic dot colors shown in (A). Large peak on right of graph represents noise in the analysis due to erroneous gene models, pseudogenes, non-homologous gene-pairs etc.

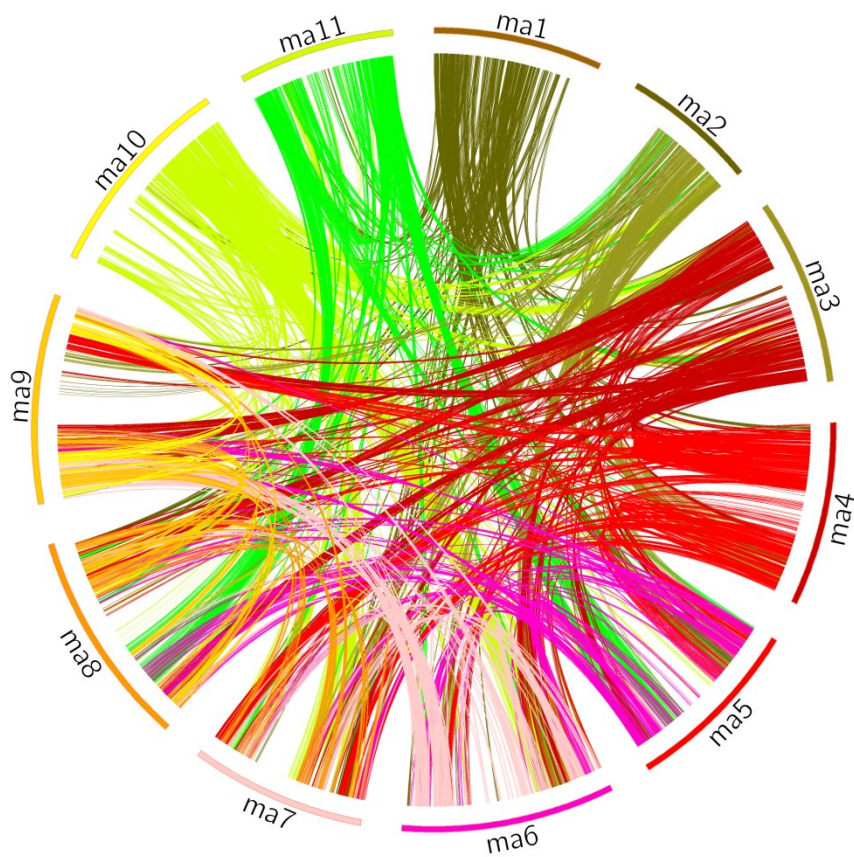

**Supplementary Figure10. Intragenomic syntenic blocks of *Musa acuminata*.**

**Chromosomes are represented as colored blocks.** For clarity, links between chromosomes that share less than 5 gene pairs were omitted. The image was produced using Circos (<http://circos.ca/>)

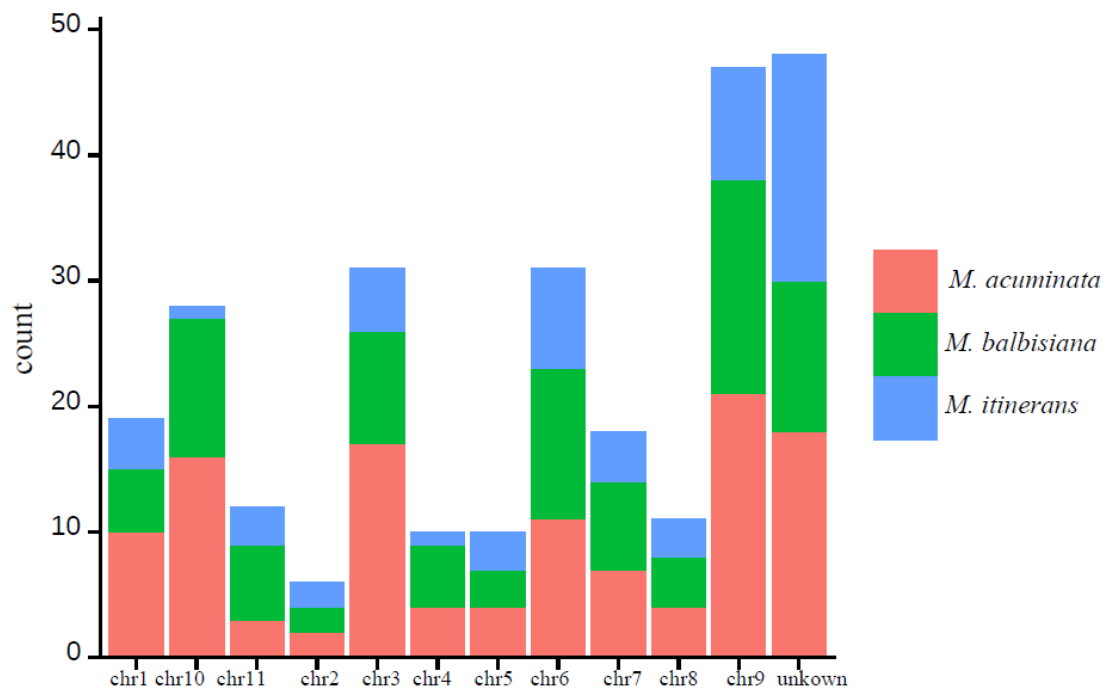

**Supplementary Figure 11. The distribution of NBS-encoding genes for *Musa acuminata*, *Musa itinerans*, *Musa balbisiana* along chromosomes.**

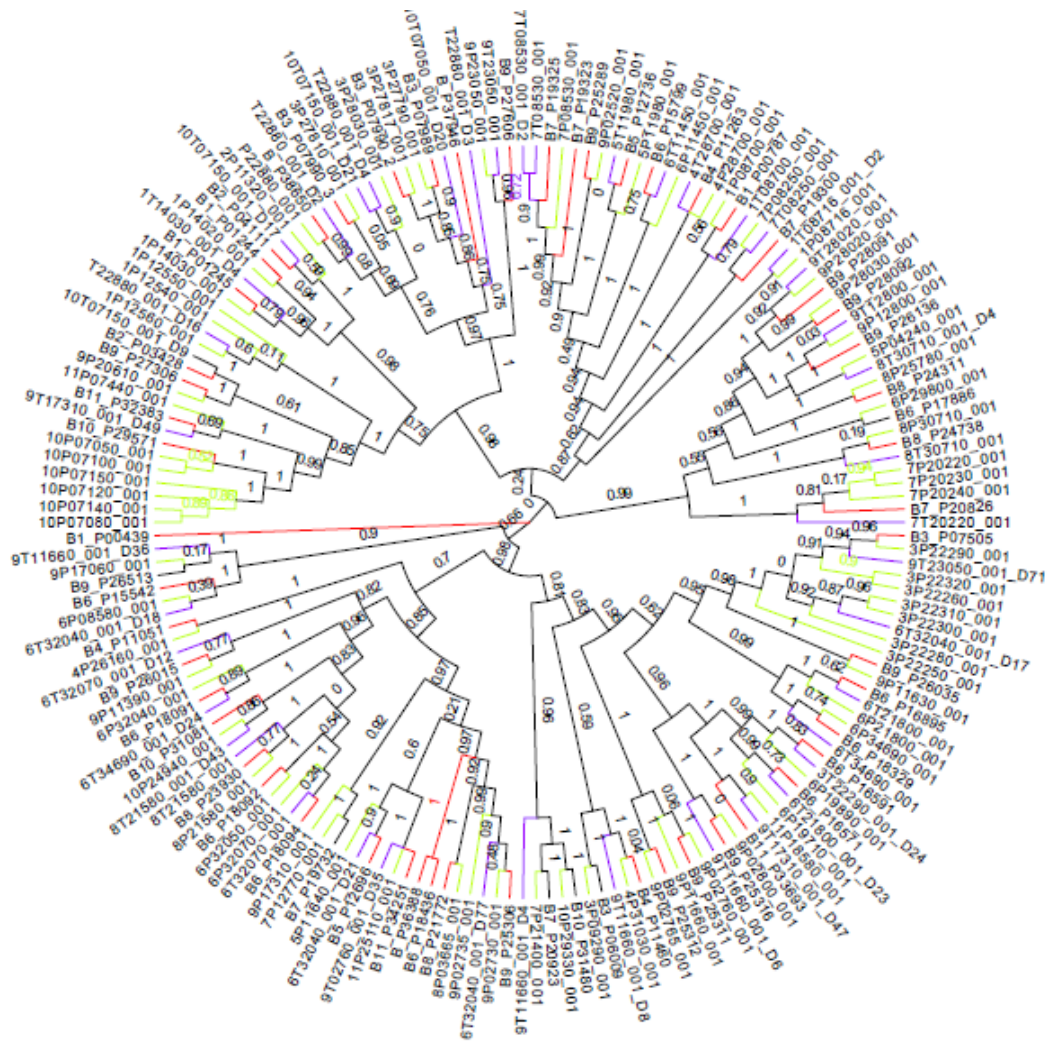

**Supplementary Figure 12. Maximum likelihood phylogenetic analysis of the NBS-encoding super gene family of *Musa* species.** The green tip branches denoted *M. acuminata*, blue tip branches represented *M. itinerans*, red tip branches represented *M. balbisiana*. Numbers on the branches are the bootstrap values. Intermingled branches between species and few clusters of gene families within species indicated the ancient polymorphisms or random lineage sorting.

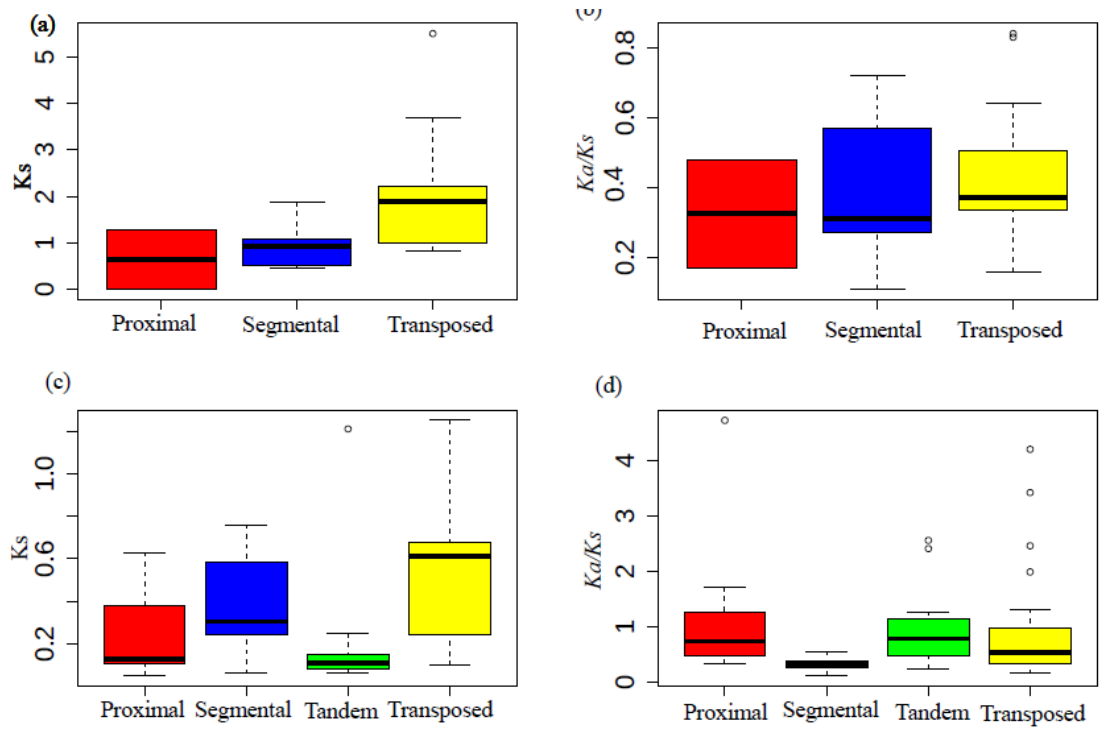

**Supplementary Figure 13. Age and selection intensities of NBS-LRR gene families with different duplicated modes hosted in two *Musa* species. *M. itinerans* (Panel a and b) and *M. acuminata* (Panel c and d).**

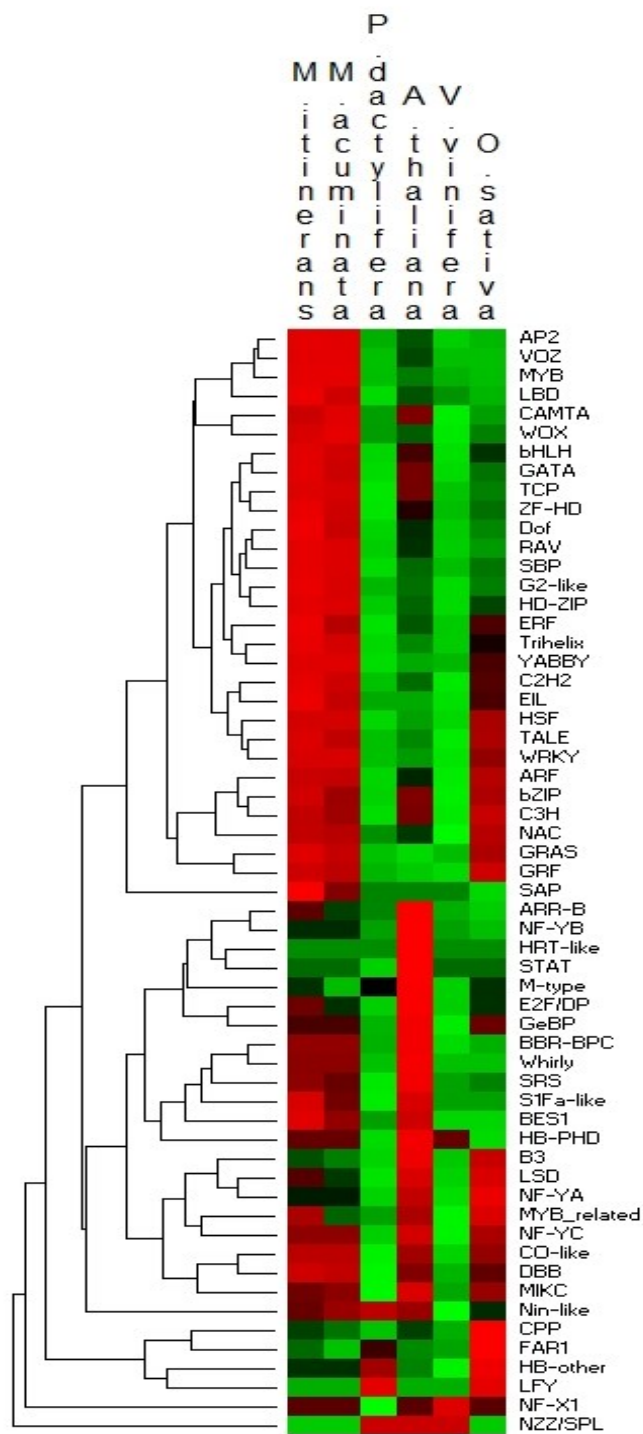

**Supplementary Figure 14. Hierarchical clustering of 58 transcription factors (TFs) among *Musa itinerans* and other five species.** The green and red color code indicates whether a particular TF is under or over-represented (based on z-scores), respectively, in a particular species across the 6 genomes analyzed. Hence, red blocks reflect gene family expansions.

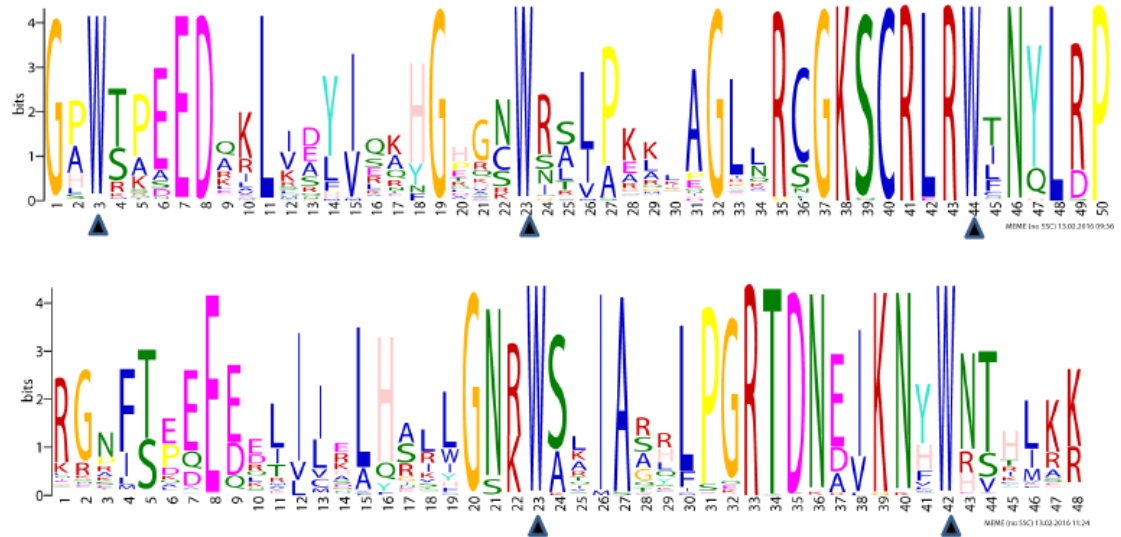

**Supplementary Figure 15. DNA-binding domains of R2R3-MYB transcription factor proteins in *Musa acuminata*, and *Musa itinerans*.** Above represent the R2 repeats, and bottom represent the R3 repeats of R2R3-MYBs; highly conserved tryptophan amino acids are labeled with solid triangles.

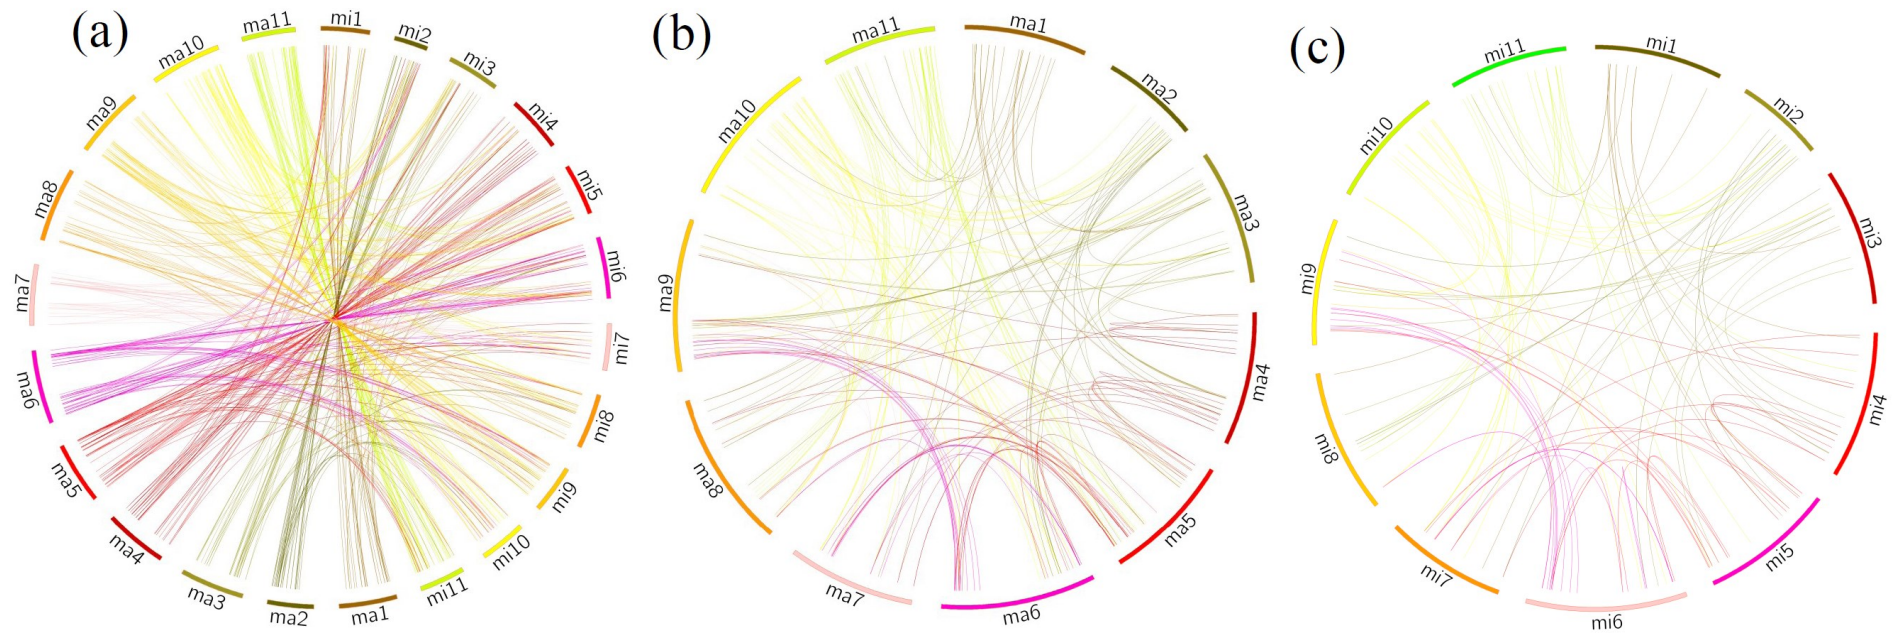

**Supplementary Figure 16. Collinearity mapping the orthologs MYB gene pairs between *Musa itinerans* and *M. acuminata*.** (a) paralogous MYB gene pairs for *M. acuminata*; (b) and *M. itinerans* (c). the chromosomes of *M. acuminata* were abbreviated as ‘ma’, and *M. itinerans* as ‘mi’; about 52 de novo predicted MYB genes for *M. itinerans* were excluded from the collinearity analysis for unanchored on chromosomes



## Supplementary Tables

**Supplementary Table 1** Summaries of reads used for *Musa itinerans* genome assembly

| Insert size (bp) | Read_length (bp) | Data output(Mb) <sup>a</sup> | Sequencing depth(X) <sup>b</sup> | Physical depth(X) <sup>b</sup> |
|------------------|------------------|------------------------------|----------------------------------|--------------------------------|
| 170              | 90_90            | 17984.54/18991.31            | 29.24                            | 27.62                          |
| 500              | 100_100          | 6166.44/6679.07              | 10.03                            | 25.07                          |
| 500              | 90_90            | 29527.75/32925.5             | 48.01                            | 133.37                         |
| 2000             | 49_49            | 7061.49/9709.01              | 11.48                            | 234.33                         |
| 5000             | 49_49            | 6435.69/10006.69             | 10.46                            | 533.9                          |
| 10000            | 49_49            | 7051.73/16080.25             | 11.47                            | 1170.02                        |
| Total            | -                | 74227.63/94391.83            | 120.7                            | 2124.31                        |

<sup>a</sup>Outputs of clean reads after filtering duplicates and reads with low quality, and raw read were separated by slash; <sup>b</sup>The estimation of sequencing depth and physical depth were based on clean data, using a genome size of 615.2Mb.

**Supplementary Table 2** Genome size estimation of *Musa itinerans* with the 17-mer analysis.

| K  | K-mer_number   | Peak-depth | Genome size | Used bases     | Used reads  | Sequencing depth |
|----|----------------|------------|-------------|----------------|-------------|------------------|
| 17 | 14,764,273,540 | 24         | 615,178,064 | 17,956,548,900 | 199,517,210 | 291,892          |

**Supplementary Table 3** Statistics of the assembly of the *Musa itinerans* genome

|                     | Scaffold size (bp) | Scaffold number | Contig size(bp) | Contig number |
|---------------------|--------------------|-----------------|-----------------|---------------|
| Maximum size        | 1,648,447          | -               | 7,822           | -             |
| N50                 | 192,092            | 571             | 33,903          | 3,002         |
| N60                 | 130,648            | 863             | 23,709          | 4,499         |
| N70                 | 85,290             | 1,302           | 15,294          | 6,179         |
| N80                 | 47,683             | 2,026           | 8,984           | 10,313        |
| N90                 | 19,491             | 3,519           | 3,668           | 17,421        |
| Total_length        | 462,139,488        | -               | 422,119,989     | -             |
| Number $\geq$ 100bp |                    | 75,687          |                 | 103,534       |
| Number $\geq$ 2kb   |                    | 7,194           |                 | 22,395        |

**Supplementary Table 4.** The completeness of *Musa acuminata* and *Musa itinerans* genome assemblies evaluated with coverage of the conserved 248 core eukaryote gene (CEGs) with CEGMA program.

|                     | Complete CEGs | Prots <sup>2</sup> | %Completeness <sup>3</sup> | Total <sup>4</sup> | Average <sup>5</sup> | %Ortho <sup>6</sup> |       |
|---------------------|---------------|--------------------|----------------------------|--------------------|----------------------|---------------------|-------|
| <i>M. itinerans</i> | complete      | 198                | 79.84                      | 425                | 2.15                 | 58.59               |       |
|                     | Group1        | 66                 | 51                         | 77.27              | 89                   | 1.75                | 43.14 |
|                     | Group2        | 56                 | 43                         | 76.79              | 76                   | 1.77                | 44.19 |
|                     | Group3        | 61                 | 46                         | 75.41              | 105                  | 2.28                | 65.22 |
|                     | Group4        | 65                 | 58                         | 89.23              | 155                  | 2.67                | 77.59 |
|                     | Partial       |                    | 234                        | 94.35              | 589                  | 2.52                | 70.09 |
|                     | Group1        | 66                 | 60                         | 90.91              | 124                  | 2.07                | 50    |
|                     | Group2        | 56                 | 52                         | 92.86              | 116                  | 2.23                | 55.77 |
|                     | Group3        | 61                 | 59                         | 96.72              | 156                  | 2.64                | 83.05 |
|                     | Group4        | 65                 | 63                         | 96.92              | 193                  | 3.06                | 88.89 |
| <i>M. acuminata</i> | complete      | 203                | 81.85                      | 436                | 2.15                 | 60.1                |       |
|                     | Group1        | 66                 | 51                         | 77.27              | 89                   | 1.75                | 43.14 |
|                     | Group2        | 56                 | 43                         | 76.79              | 79                   | 1.84                | 41.86 |
|                     | Group3        | 61                 | 49                         | 80.33              | 116                  | 2.37                | 73.47 |
|                     | Group4        | 65                 | 60                         | 92.31              | 152                  | 2.53                | 76.67 |
|                     | Partial       |                    | 232                        | 93.55              | 565                  | 2.44                | 72.84 |
|                     | Group1        | 66                 | 59                         | 89.39              | 118                  | 2                   | 54.24 |
|                     | Group2        | 56                 | 49                         | 87.5               | 110                  | 2.24                | 63.27 |
|                     | Group3        | 61                 | 61                         | 100                | 159                  | 2.61                | 83.61 |
|                     | Group4        | 65                 | 63                         | 96.92              | 178                  | 2.83                | 87.3  |

<sup>1</sup> Complete: the predicted proteins in the set of 248 CEGs not less than 70% of the alignment length when aligned to the HMM for the KOG for that protein-family

<sup>2</sup> Prots : number of 248 ultra-conserved CEGs present in genome

<sup>3</sup> %Completeness: percentage of 248 ultra-conserved CEGs present

<sup>4</sup> Total: total number of CEGs present including putative orthologs

<sup>5</sup> Average: average number of orthologs per CEG

<sup>6</sup> %Ortho: percentage of detected CEGs that have more than one ortholog

**Supplementary Table 5** Comparison of repeat contents in the assembled genomes of *Musa itinerans* and *Musa. acuminata*

| Classification             | <i>Musa itinerans</i>    |                             | <i>Musa acuminata</i>    |                         |
|----------------------------|--------------------------|-----------------------------|--------------------------|-------------------------|
|                            | DNA_length<br>h<br>(Mbp) | Percent of<br>genome<br>(%) | DNA_length<br>h<br>(Mbp) | Percent of<br>genome(%) |
| <b>Class I:</b>            |                          |                             |                          |                         |
| <b>Retrotransposon</b>     | 162.88                   | 35.24                       | 157.81                   | 33.37                   |
| LTR-Retrotransposon        | 157.43                   | 34.07                       | 154.75                   | 32.72                   |
| Gypsy                      | 75.11                    | 16.25                       | 86.76                    | 18.34                   |
| Copia                      | 77.26                    | 16.71                       | 73.86                    | 15.62                   |
| other                      | 39.32                    | 8.51                        | 29.38                    | 6.21                    |
| Non-LTR<br>Retrotransposon | 7.19                     | 1.56                        | 4.69                     | 0.99                    |
| LINE                       | 6.68                     | 1.45                        | 4.48                     | 0.95                    |
| SINE                       | 0.51                     | 0.11                        | 0.21                     | 0.04                    |
| <b>Class II: DNA</b>       |                          |                             |                          |                         |
| Transposon                 | 14.55                    | 3.15                        | 10.08                    | 2.13                    |
| hAT                        | 4.15                     | 0.90                        | 2.48                     | 0.52                    |
| CMC                        | 4.48                     | 0.97                        | 4.91                     | 1.04                    |
| TcMar                      | 0.52                     | 0.11                        | 0.36                     | 0.11                    |
| other                      | 6.65                     | 1.43                        | 3.75                     | 0.79                    |
| <b>Satellite</b>           | 0.24                     | 0.05                        | 0.08                     | 0.02                    |
| <b>Simple repeat</b>       | 0.6                      | 0.13                        | 0.3                      | 0.06                    |
| <b>Other</b>               | 0.003                    | 0                           | 0.006                    | 0                       |
| <b>Unknown</b>             | 11.58                    | 2.51                        | 8.14                     | 1.72                    |
| total                      | 179.99                   | 38.95                       | 167.59                   | 35.43                   |

**Supplementary Table 6** Homology-based gene predication for *Musa itinerans* genome

| Gene set       |                             | Gene number | Average gene length | Average cds length | Average exon number | Average exon length | Average intron length |
|----------------|-----------------------------|-------------|---------------------|--------------------|---------------------|---------------------|-----------------------|
| Homolog        | <i>Arabidopsis thaliana</i> | 34,958      | 2931.69             | 939.41             | 4.06                | 231                 | 651.29                |
|                | <i>Musa acuminata</i>       | 49,727      | 2685.5              | 864.81             | 4.05                | 213                 | 596.7                 |
|                | <i>Oryza sativa</i>         | 50,775      | 2150.9              | 771.51             | 3.17                | 243                 | 635.07                |
|                | <i>Phoenix dactylifera</i>  | 47,543      | 2045.76             | 774.47             | 3.19                | 243                 | 581.46                |
|                | <i>Sorghum bicolor</i>      | 36,796      | 2822.91             | 914.75             | 3.96                | 231                 | 644.81                |
|                | <i>Zea mays</i>             | 58,241      | 1933.62             | 722.16             | 2.95                | 244                 | 620.08                |
| Final gene set | <i>M. itinerans</i>         | 32,456      | 3608.35             | 1065.4             | 5.15                | 207                 | 613.49                |

**Supplementary Table 7** Gene functional annotations based on different protein database for *Musa itinerans* genome.

|             | Number | Percent (%) |
|-------------|--------|-------------|
| Total       | 32,456 |             |
| InterPro    | 23,155 | 71.34       |
| GO          | 17,883 | 55.10       |
| KEGG        | 17,365 | 53.50       |
| Swissprot   | 21,958 | 67.65       |
| TrEMBL      | 28,048 | 86.42       |
| Annotated   | 28,231 | 86.98       |
| Unannotated | 4,225  | 13.02       |

**Supplementary Table 8** Non-coding RNA genes in the *Musa itinerans* genome.

| Type  | Copy(w)  | Average length(bp) | Total length(bp) | % of genome |        |
|-------|----------|--------------------|------------------|-------------|--------|
| miRNA | 345      | 116.4              | 40,159           | 0.0087      |        |
| tRNA  | 977      | 75.4               | 73,657           | 0.0159      |        |
| rRNA  | 278      | 194.2              | 53,994           | 0.0117      |        |
|       | 18S      | 42                 | 748.5            | 31,437      | 0.0068 |
|       | 28S      | 54                 | 117.9            | 6,368       | 0.0014 |
|       | 5.8S     | 13                 | 117.5            | 1,528       | 0.0003 |
|       | 5S       | 169                | 86.8             | 14,661      | 0.0032 |
| snRNA | snRNA    | 299                | 120.7            | 36,081      | 0.0078 |
|       | CD-box   | 170                | 103.2            | 17,540      | 0.0038 |
|       | HACA-box | 18                 | 121.9            | 2,194       | 0.0005 |
|       | splicing | 111                | 147.3            | 16,347      | 0.0035 |



**Supplementary Table 9.** Gene family clustering among *Musa itinerans* and other eight related species

| Species                     | Genes number | Genes in families | Unclustered genes | Family number | Unique families | Average genes per family |
|-----------------------------|--------------|-------------------|-------------------|---------------|-----------------|--------------------------|
| <i>Arabidopsis thaliana</i> | 26,637       | 23,036            | 3,601             | 12,334        | 889             | 1.87                     |
| <i>Musa acuminata</i>       | 34,239       | 29,222            | 5,017             | 18,564        | 88              | 1.57                     |
| <i>Musa balbisiana</i>      | 36,037       | 30,369            | 5,668             | 15,827        | 274             | 1.92                     |
| <i>Oryza sativa</i>         | 35,402       | 24,698            | 10,704            | 15,867        | 1,191           | 1.56                     |
| <i>Phoenix dactylifera</i>  | 24,838       | 22,278            | 2,560             | 13,221        | 167             | 1.69                     |
| <i>Sorghum bicolor</i>      | 27,159       | 23,284            | 3,875             | 15,068        | 416             | 1.55                     |
| <i>Vitis vinifera</i>       | 25,329       | 19,311            | 6,018             | 12,144        | 695             | 1.59                     |
| <i>Elaeis guineensis</i>    | 28,336       | 20,534            | 7,802             | 11,966        | 351             | 1.72                     |
| <i>Musa itinerans</i>       | 28,524       | 26,955            | 1,569             | 16,742        | 177             | 1.61                     |

**Supplementary Table 10.** Gene ontology (GO) enrichment analysis of *Musa itinerans* unique gene families among five species<sup>a</sup> and shown for significantly<sup>b</sup> represented GO terms.

| GO_id      | GO terms                                                                                                     | Number of enriched genes | Number of genes in background | P-value  |
|------------|--------------------------------------------------------------------------------------------------------------|--------------------------|-------------------------------|----------|
| GO:0034061 | DNA polymerase activity                                                                                      | 8                        | 30                            | 1.56E-09 |
| GO:0016891 | endoribonuclease activity, producing 5'-phosphomonoesters                                                    | 7                        | 21                            | 5.12E-09 |
| GO:0016893 | endonuclease activity, active with either ribo- or deoxyribonucleic acids and producing 5'-phosphomonoesters | 7                        | 22                            | 7.47E-09 |
| GO:0004521 | endoribonuclease activity                                                                                    | 7                        | 25                            | 2.07E-08 |
| GO:0004519 | endonuclease activity                                                                                        | 7                        | 35                            | 2.74E-07 |
| GO:0004540 | ribonuclease activity                                                                                        | 7                        | 37                            | 4.15E-07 |
| GO:0003676 | nucleic acid binding                                                                                         | 31                       | 1628                          | 4.01E-06 |
| GO:0006260 | DNA replication                                                                                              | 8                        | 70                            | 4.61E-06 |
| GO:0060089 | molecular transducer activity                                                                                | 9                        | 142                           | 4.48E-05 |
| GO:0044391 | ribosomal subunit                                                                                            | 13                       | 311                           | 5.28E-05 |
| GO:0005840 | ribosome                                                                                                     | 15                       | 481                           | 0.00     |
| GO:0015934 | large ribosomal subunit                                                                                      | 9                        | 172                           | 0.00     |
| GO:0004871 | signal transducer activity                                                                                   | 7                        | 112                           | 0.00     |
| GO:0032991 | macromolecular complex                                                                                       | 28                       | 1579                          | 0.00     |
| GO:0016779 | nucleotidyltransferase activity                                                                              | 8                        | 161                           | 0.00     |
| GO:0006259 | DNA metabolic process                                                                                        | 13                       | 440                           | 0.00     |
| GO:1901360 | organic cyclic compound metabolic process                                                                    | 34                       | 2501                          | 0.00     |
| GO:0090304 | nucleic acid metabolic process                                                                               | 26                       | 1608                          | 0.00     |
| GO:0004518 | nuclease activity                                                                                            | 7                        | 123                           | 0.00     |
| GO:0034641 | cellular nitrogen compound metabolic process                                                                 | 32                       | 2300                          | 0.00     |
| GO:0046483 | heterocycle metabolic process                                                                                | 32                       | 2314                          | 0.00     |
| GO:0051716 | cellular response to stimulus                                                                                | 19                       | 993                           | 0.00     |
| GO:0043228 | non-membrane-bounded organelle                                                                               | 19                       | 929                           | 0.01     |
| GO:0043232 | intracellular non-membrane-bounded organelle                                                                 | 19                       | 929                           | 0.01     |
| GO:0006725 | cellular aromatic compound metabolic process                                                                 | 32                       | 2414                          | 0.01     |
| GO:0007154 | cell communication                                                                                           | 17                       | 839                           | 0.01     |
| GO:0006807 | nitrogen compound metabolic process                                                                          | 34                       | 2693                          | 0.01     |
| GO:0007165 | signal transduction                                                                                          | 15                       | 680                           | 0.01     |
| GO:0023052 | signaling                                                                                                    | 15                       | 680                           | 0.01     |

|            |                                                    |    |      |      |
|------------|----------------------------------------------------|----|------|------|
| GO:0044700 | single organism signaling                          | 15 | 680  | 0.01 |
| GO:0034645 | cellular macromolecule biosynthetic process        | 21 | 1239 | 0.01 |
| GO:0006139 | nucleobase-containing compound metabolic process   | 29 | 2106 | 0.01 |
| GO:0001071 | nucleic acid binding transcription factor activity | 9  | 285  | 0.01 |
| GO:0009059 | macromolecule biosynthetic process                 | 21 | 1268 | 0.01 |
| GO:0043170 | macromolecule metabolic process                    | 46 | 4384 | 0.01 |
| GO:0030529 | ribonucleoprotein complex                          | 15 | 711  | 0.02 |
| GO:0005198 | structural molecule activity                       | 12 | 550  | 0.03 |
| GO:0044249 | cellular biosynthetic process                      | 27 | 2015 | 0.03 |
| GO:0034518 | RNA cap binding complex                            | 2  | 5    | 0.04 |
| GO:1901576 | organic substance biosynthetic process             | 27 | 2044 | 0.04 |
| GO:0010467 | gene expression                                    | 25 | 1828 | 0.05 |

<sup>a</sup>Five species including *Musa itinerans*, *Musa acuminata*, *Musa babisiana*, *Phoenix dactylifera*, *Elaeis guineensis*,

<sup>b</sup>The Bonferroni correction of the significance level of hypergeometric test set threshold P value as 0.05

**Supplementary Table 11.** KEGG pathway enrichment analysis of *Musa itinerans* unique gene families among five species<sup>a</sup> and shown for significantly<sup>b</sup> represented pathways

| Pathway                           | Number of enriched genes (82) | Number of genes in background (16517) | P-value  | Pathway ID |
|-----------------------------------|-------------------------------|---------------------------------------|----------|------------|
| Ribosome                          | 16                            | 584                                   | 2.33E-08 | ko03010    |
| Proteasome                        | 6                             | 110                                   | 1.77E-05 | ko03050    |
| Plant hormone signal transduction | 14                            | 1151                                  | 0.00     | ko04075    |
| Inositol phosphate metabolism     | 4                             | 135                                   | 0.00     | ko00562    |
| Ether lipid metabolism            | 2                             | 41                                    | 0.02     | ko00565    |
| Fatty acid biosynthesis           | 2                             | 60                                    | 0.04     | ko00061    |

<sup>a</sup> Five species including *Musa itinerans*, *Musa acuminata*, *Musa babisiana*, *Phoenix dactylifera*, *Elaeis guineensis*.

<sup>b</sup> The Bonferroni correction of the significance level of hypergeometric test set threshold P value as 0.05

**Supplementary Table 12.** KEGG pathway enrichment analysis of expanded gene families for ancestral *Musa* species among nine species<sup>a</sup> and shown for significantly<sup>b</sup> represented pathways

| Pathway                                               | Number of enriched genes(1086) | Number of genes in background (16517) | P-value  | Pathway ID |
|-------------------------------------------------------|--------------------------------|---------------------------------------|----------|------------|
| Phagosome                                             | 61                             | 225                                   | 2.18E-20 | ko04145    |
| Plant-pathogen interaction                            | 149                            | 1020                                  | 1.11E-19 | ko04626    |
| Flavonoid biosynthesis                                | 47                             | 154                                   | 2.29E-18 | ko00941    |
| Glycosphingolipid biosynthesis - ganglio series       | 20                             | 32                                    | 3.11E-15 | ko00604    |
| Flavone and flavonol biosynthesis                     | 28                             | 76                                    | 1.62E-13 | ko00944    |
| Glycosaminoglycan degradation                         | 20                             | 52                                    | 3.26E-10 | ko00531    |
| Cysteine and methionine metabolism                    | 33                             | 137                                   | 3.89E-10 | ko00270    |
| Galactose metabolism                                  | 29                             | 110                                   | 4.91E-10 | ko00052    |
| Linoleic acid metabolism                              | 13                             | 32                                    | 2.90E-07 | ko00591    |
| Ascorbate and aldarate metabolism                     | 27                             | 136                                   | 1.21E-06 | ko00053    |
| alpha-Linolenic acid metabolism                       | 21                             | 93                                    | 2.67E-06 | ko00592    |
| Sphingolipid metabolism                               | 20                             | 89                                    | 4.96E-06 | ko00600    |
| Inositol phosphate metabolism                         | 24                             | 135                                   | 3.34E-05 | ko00562    |
| Phenylpropanoid biosynthesis                          | 38                             | 280                                   | 7.06E-05 | ko00940    |
| Monoterpenoid biosynthesis                            | 9                              | 25                                    | 7.06E-05 | ko00902    |
| Stilbenoid, diarylheptanoid and gingerol biosynthesis | 21                             | 117                                   | 8.59E-05 | ko00945    |
| Isoflavonoid biosynthesis                             | 7                              | 19                                    | 4.67E-04 | ko00943    |
| Other glycan degradation                              | 20                             | 123                                   | 4.98E-04 | ko00511    |
| Phosphatidylinositol signaling system                 | 24                             | 163                                   | 5.35E-04 | ko04070    |
| Amino sugar and nucleotide sugar metabolism           | 34                             | 270                                   | 6.15E-04 | ko00520    |
| Tryptophan metabolism                                 | 14                             | 74                                    | 8.37E-04 | ko00380    |
| Limonene and pinene degradation                       | 15                             | 90                                    | 2.03E-03 | ko00903    |

|                                       |     |      |          |         |
|---------------------------------------|-----|------|----------|---------|
| Diterpenoid biosynthesis              | 12  | 69   | 4.39E-03 | ko00904 |
| Biosynthesis of secondary metabolites | 157 | 1921 | 5.04E-03 | ko01110 |
| ABC transporters                      | 22  | 181  | 9.51E-03 | ko02010 |
| Metabolic pathways                    | 280 | 3783 | 2.69E-02 | ko01100 |
| Starch and sucrose metabolism         | 43  | 463  | 3.08E-02 | ko00500 |
| Phenylalanine metabolism              | 18  | 156  | 3.08E-02 | ko00360 |
| Plant hormone signal transduction     | 94  | 1151 | 3.36E-02 | ko04075 |

---

<sup>a</sup> Nine species used in OrthoMCL clustering including *Musa itinerans*, *Musa acuminata*, *Musa balbisiana*, *Phoenix dactylifera*, *Elaeis guineensis*, *Sorghum bicolor*, *Oryza sativa*, *Vitis vinifera*, *Arabidopsis thaliana*

<sup>b</sup> The Bonferroni correction of the significance level of hypergeometric test set threshold P value as 0.05

**Supplementary Table 13.** KEGG pathway enrichment analysis of contracted ancestral *Musa* gene families among nine species<sup>a</sup> and shown for significantly<sup>b</sup> represented pathways

| Pathway                                                | Number of enriched genes(900) | Number of genes in background (16517) | P-value  | Pathway ID |
|--------------------------------------------------------|-------------------------------|---------------------------------------|----------|------------|
| Phenylalanine metabolism                               | 26                            | 156                                   | 3.44E-05 | ko00360    |
| Isoquinoline alkaloid biosynthesis                     | 10                            | 34                                    | 4.73E-04 | ko00950    |
| Phenylpropanoid biosynthesis                           | 32                            | 280                                   | 2.21E-03 | ko00940    |
| Ribosome                                               | 54                            | 584                                   | 2.71E-03 | ko03010    |
| Tropane, piperidine and pyridine alkaloid biosynthesis | 7                             | 25                                    | 6.14E-03 | ko00960    |
| Ubiquinone and other terpenoid-quinone biosynthesis    | 11                            | 64                                    | 1.07E-02 | ko00130    |
| Other types of O-glycan biosynthesis                   | 6                             | 21                                    | 1.07E-02 | ko00514    |
| Zeatin biosynthesis                                    | 11                            | 67                                    | 1.25E-02 | ko00908    |
| Protein processing in endoplasmic reticulum            | 41                            | 474                                   | 2.56E-02 | ko04141    |
| Tyrosine metabolism                                    | 11                            | 75                                    | 2.56E-02 | ko00350    |
| Galactose metabolism                                   | 14                            | 110                                   | 2.56E-02 | ko00052    |
| Glycosphingolipid biosynthesis - globo series          | 5                             | 19                                    | 2.64E-02 | ko00603    |
| Protein export                                         | 11                            | 80                                    | 3.31E-02 | ko03060    |
| Cyanoamino acid metabolism                             | 12                            | 95                                    | 4.09E-02 | ko00460    |
| Pyruvate metabolism                                    | 16                            | 145                                   | 4.09E-02 | ko00620    |

<sup>a</sup> Nine species used in OrthoMCL clustering including *Musa itinerans*, *Musa acuminata*, *Musa balbisiana*, *Phoenix dactylifera*, *Elaeis guineensis*, *Sorghum bicolor*, *Oryza sativa*, *Vitis vinifera*, *Arabidopsis thaliana*

<sup>b</sup> The Bonferroni correction of the significance level of hypergeometric test set threshold P value as 0.05

**Supplementary Table 14.** KEGG pathway enrichment analysis of *Musa itinerans* expanded gene families among nine species<sup>a</sup> and shown for significantly<sup>b</sup> represented pathways.

| Pathway                                                | Number of enriched genes (594) | Number of genes in background (16517) | P-value  | Pathway ID |
|--------------------------------------------------------|--------------------------------|---------------------------------------|----------|------------|
| Phagosome                                              | 50                             | 225                                   | 6.61E-24 | ko04145    |
| Amino sugar and nucleotide sugar metabolism            | 40                             | 270                                   | 8.13E-13 | ko00520    |
| Biosynthesis of secondary metabolites                  | 130                            | 1921                                  | 8.33E-12 | ko01110    |
| Ribosome                                               | 53                             | 584                                   | 9.98E-09 | ko03010    |
| Flavone and flavonol biosynthesis                      | 16                             | 76                                    | 1.37E-07 | ko00944    |
| Cysteine and methionine metabolism                     | 19                             | 137                                   | 5.59E-06 | ko00270    |
| Flavonoid biosynthesis                                 | 19                             | 154                                   | 2.91E-05 | ko00941    |
| Pentose and glucuronate interconversions               | 19                             | 193                                   | 6.44E-04 | ko00040    |
| Metabolic pathways                                     | 174                            | 3783                                  | 1.12E-03 | ko01100    |
| Starch and sucrose metabolism                          | 33                             | 463                                   | 1.12E-03 | ko00500    |
| Zeatin biosynthesis                                    | 9                              | 67                                    | 4.18E-03 | ko00908    |
| Glycolysis / Gluconeogenesis                           | 18                             | 221                                   | 6.59E-03 | ko00010    |
| Carbon fixation in photosynthetic organisms            | 13                             | 136                                   | 7.02E-03 | ko00710    |
| Tyrosine metabolism                                    | 9                              | 75                                    | 7.13E-03 | ko00350    |
| Biosynthesis of unsaturated fatty acids                | 8                              | 61                                    | 7.13E-03 | ko01040    |
| Glucosinolate biosynthesis                             | 4                              | 15                                    | 7.42E-03 | ko00966    |
| Tropane, piperidine and pyridine alkaloid biosynthesis | 5                              | 25                                    | 7.42E-03 | ko00960    |
| Protein export                                         | 9                              | 80                                    | 9.17E-03 | ko03060    |
| Photosynthesis                                         | 12                             | 130                                   | 9.78E-03 | ko00195    |
| Fructose and mannose metabolism                        | 11                             | 123                                   | 1.76E-02 | ko00051    |
| Isoquinoline alkaloid biosynthesis                     | 5                              | 34                                    | 2.41E-02 | ko00950    |

<sup>a</sup> Nine species used in OrthoMCL clustering including *Musa itinerans*, *Musa acuminata*, *Musa balbisiana*, *Phoenix dactylifera*, *Elaeis guineensis*, *Sorghum bicolor*, *Oryza sativa*, *Vitis vinifera*, *Arabidopsis thaliana*

<sup>b</sup> The Bonferroni correction of the significance level of hypergeometric test set threshold P value as 0.05



**Supplementary Table 15.** KEGG pathway enrichment analysis of *Musa itinerans* contracted gene families among nine species<sup>a</sup> and shown for significantly<sup>b</sup> represented pathways

| Pathway                                               | Number of enriched genes (876) | Number of genes in background (16517) | P-value  | Pathway |
|-------------------------------------------------------|--------------------------------|---------------------------------------|----------|---------|
| ABC transporters                                      | 46                             | 181                                   | 1.25E-17 | ko02010 |
| Glycosphingolipid biosynthesis - ganglio series       | 20                             | 32                                    | 1.08E-16 | ko00604 |
| Glycosaminoglycan degradation                         | 20                             | 52                                    | 1.47E-11 | ko00531 |
| Plant-pathogen interaction                            | 103                            | 1020                                  | 2.28E-09 | ko04626 |
| Linoleic acid metabolism                              | 13                             | 32                                    | 4.57E-08 | ko00591 |
| Sphingolipid metabolism                               | 21                             | 89                                    | 6.36E-08 | ko00600 |
| Other glycan degradation                              | 24                             | 123                                   | 2.50E-07 | ko00511 |
| Galactose metabolism                                  | 20                             | 110                                   | 1.03E-05 | ko00052 |
| Limonene and pinene degradation                       | 17                             | 90                                    | 3.34E-05 | ko00903 |
| Ether lipid metabolism                                | 11                             | 41                                    | 4.47E-05 | ko00565 |
| Stilbenoid, diarylheptanoid and gingerol biosynthesis | 19                             | 117                                   | 7.68E-05 | ko00945 |
| Inositol phosphate metabolism                         | 20                             | 135                                   | 1.63E-04 | ko00562 |
| Endocytosis                                           | 28                             | 228                                   | 1.63E-04 | ko04144 |
| RNA polymerase                                        | 22                             | 160                                   | 1.92E-04 | ko03020 |
| Ascorbate and aldarate metabolism                     | 19                             | 136                                   | 4.77E-04 | ko00053 |
| Tryptophan metabolism                                 | 13                             | 74                                    | 5.43E-04 | ko00380 |
| Flavone and flavonol biosynthesis                     | 13                             | 76                                    | 6.76E-04 | ko00944 |
| Phosphatidylinositol signaling system                 | 20                             | 163                                   | 1.57E-03 | ko04070 |

<sup>a</sup> Nine species used in OrthoMCL clustering including *Musa itinerans*, *Musa acuminata*, *Musa balbisiana*, *Phoenix dactylifera*, *Elaeis guineensis*, *Sorghum bicolor*, *Oryza sativa*, *Vitis vinifera*, *Arabidopsis thaliana*

<sup>b</sup> The Bonferroni correction of the significance level of hypergeometric test set threshold P value as 0.05

**Supplementary Table 16.** Overview of *Musa itinerans* pseudo-chromosomes based on syntenic blocks between *M. itinerans* and *Musa acuminata*

| Pseudo chromosome           | Number of Scaffolds | Total size of scaffold(bp) | Number of genes |
|-----------------------------|---------------------|----------------------------|-----------------|
| 1                           | 96                  | 23,618,511                 | 2,271           |
| 2                           | 46                  | 16,378,154                 | 1,698           |
| 3                           | 78                  | 25,367,131                 | 2,540           |
| 4                           | 100                 | 27,186,878                 | 2,742           |
| 5                           | 84                  | 24,886,606                 | 2,332           |
| 6                           | 105                 | 29,658,729                 | 2,947           |
| 7                           | 107                 | 22,363,963                 | 2,171           |
| 8                           | 108                 | 26,494,654                 | 2,605           |
| 9                           | 93                  | 23,201,293                 | 2,247           |
| 10                          | 80                  | 22,470,544                 | 2,345           |
| 11                          | 97                  | 21,913,503                 | 2,106           |
| Un_random                   | 49                  | 9,706,350                  | 666             |
| Total                       | 1,043               | 273,246,316                | 26,670          |
| <i>M.itinerans</i> assembly | 75,687              | 462,139,488                | 32,356          |

**Supplementary Table 17** Classifications\* of NBS-containing Resistances in three *Musa* species *M. acuminata*, *M. balbisiana*, and *M. itinerans*.

|                                       | <i>M. acuminata</i> | <i>M. balbisiana</i> | <i>M. itinerans</i> |
|---------------------------------------|---------------------|----------------------|---------------------|
| NBS (>95aa)                           | 117(99)             | 93(82)               | 62(57)              |
| (NBS) <sub>n</sub> ( <sub>n</sub> >1) | 20                  | 19                   | 8                   |
| NBS-LRR1                              | 80                  | 69                   | 50                  |
| NBS-LRR2                              | 0                   | 0                    | 0                   |
| NBS-LRR3                              | 1                   | 0                    | 1                   |
| CC-NBS                                | 30                  | 34                   | 20                  |
| TIR-NBS                               | 0                   | 0                    | 0                   |
| Number of singletons                  | 40                  | 47                   | 32                  |
| Number of multiple genes              | 35                  | 12                   | 12                  |
| Number of gene families*              | 10                  | 4                    | 4                   |
| Average members per gene family       | 3.5                 | 3                    | 3                   |
| Proportion of multi-gene              | 0.467               | 0.203                | 0.273               |

\*Gene family classification determined by identity > 70% with the 140 amino acids standard NB-ARC Pfam domain (PF00931)

**Supplementary Table 18** Genome-wide duplication modes and ages of NBS-encoding genes in *Musa itinerans*

| Duplicate1 | Duplicate2 | Mode       | $Ka$ | $Ks$ | $Ka/Ks$ |
|------------|------------|------------|------|------|---------|
| Mi_g021494 | Mi_g021491 | proximal   | 0.61 | 1.27 | 0.48    |
| Mi_g023761 | Mi_g023763 | proximal   | 0    | 0.01 | 0.17    |
| Mi_g000507 | Mi_g000689 | segmental  | 0.32 | 0.45 | 0.72    |
| Mi_g010079 | Mi_g019630 | segmental  | 0.06 | 0.53 | 0.11    |
| Mi_g015709 | Mi_g011020 | segmental  | 0.32 | 0.99 | 0.32    |
| Mi_g004238 | Mi_g026403 | segmental  | 0.62 | 1.08 | 0.57    |
| Mi_g021494 | Mi_g003639 | segmental  | 0.56 | 1.88 | 0.3     |
| Mi_g000382 | Mi_g031777 | segmental  | 0.24 | 0.87 | 0.27    |
| Mi_g005793 | Mi_g000507 | transposed | 0.43 | 0.84 | 0.51    |
| Mi_g018211 | Mi_g005793 | transposed | 0.41 | 0.85 | 0.48    |
| Mi_g024483 | Mi_g001472 | transposed | 0.54 | 2.43 | 0.22    |
| Mi_g008673 | Mi_g000689 | transposed | 0.38 | 0.86 | 0.44    |
| Mi_g018211 | Mi_g008673 | transposed | 0.38 | 1.02 | 0.37    |
| Mi_g023244 | Mi_g008031 | transposed | -    | -    | -       |
| Mi_g000496 | Mi_g001472 | transposed | 1    | 3.68 | 0.27    |
| Mi_g011001 | Mi_g008031 | transposed | 0.73 | 2.01 | 0.36    |
| Mi_g007030 | Mi_g001419 | transposed | 0.79 | 2.17 | 0.36    |
| Mi_g001419 | Mi_g026403 | transposed | 0.62 | 1.22 | 0.5     |
| Mi_g023807 | Mi_g004238 | transposed | 0.65 | 1    | 0.64    |
| Mi_g014071 | Mi_g004238 | transposed | 0.82 | 0.99 | 0.83    |
| Mi_g007030 | Mi_g008031 | transposed | 0.69 | 1.99 | 0.35    |
| Mi_g012577 | Mi_g012553 | transposed | 1.13 | 1.35 | 0.84    |
| Mi_g007832 | Mi_g026403 | transposed | 0.71 | 2.28 | 0.31    |
| Mi_g020550 | Mi_g004238 | transposed | 0.65 | 1.78 | 0.37    |
| Mi_g008262 | Mi_g021494 | transposed | 0.69 | 1.98 | 0.35    |
| Mi_g017994 | Mi_g000382 | transposed | 0.9  | 5.5  | 0.16    |
| Mi_g003578 | Mi_g008031 | transposed | 1.04 | 2.24 | 0.46    |
| Mi_g002312 | Mi_g008031 | transposed | 1.25 | 2.1  | 0.6     |
| Mi_g018211 | Mi_g000689 | transposed | 0.36 | 1.14 | 0.32    |

**Supplementary Table 19** Genome-wide duplication modes and ages NBS-encoding genes in *Musa acuminata*.

| Duplicate1 <sup>a</sup> | Duplicate2   | Mode       | Ks   | Ka   | Ka/Ks |
|-------------------------|--------------|------------|------|------|-------|
| 1P08690_001             | 1P08716_001  | proximal   | 0.13 | 0.16 | 0.79  |
| 10P07050_001            | 10P07065_001 | proximal   | 0.09 | 0.02 | 4.72  |
| 9P02760_001             | 9P02800_001  | proximal   | 0.62 | 1.72 | 0.36  |
| 3P27810_001             | 3P27830_001  | proximal   | 0.12 | 0.16 | 0.74  |
| 3P22300_001             | 3P22320_001  | proximal   | 0.14 | 0.08 | 1.72  |
| 10P07080_001            | 10P07120_001 | proximal   | 0.05 | 0.09 | 0.58  |
| 6P32040_001             | 6P32070_001  | proximal   | 0.63 | 1.91 | 0.33  |
| 10P29330_001            | 7P21400_001  | segmental  | 0.23 | 1.09 | 0.22  |
| 3P27790_001             | 9P23050_001  | segmental  | 0.35 | 0.93 | 0.38  |
| 3P10930_001             | 9P19800_001  | segmental  | 0.06 | 0.51 | 0.12  |
| 8P03665_001             | 9P02730_001  | segmental  | 0.56 | 0.99 | 0.56  |
| 10P07050_001            | 11P07440_001 | segmental  | 0.26 | 0.8  | 0.33  |
| 8P25780_001             | 9P28020_001  | segmental  | 0.76 | 2.39 | 0.32  |
| 8P25780_001             | 9P12800_001  | segmental  | -    | -    | -     |
| 5P04240_001             | 9P12800_001  | segmental  | 0.26 | 0.82 | 0.31  |
| 6P32040_001             | 8P21580_001  | segmental  | 0.61 | 1.48 | 0.41  |
| 1P12540_001             | 1P12550_001  | tandem     | 0.07 | 0.07 | 1.14  |
| 1P12550_001             | 1P12560_001  | tandem     | 0.12 | 0.14 | 0.82  |
| 9P02730_001             | 9P02735_001  | tandem     | 0.11 | 0.24 | 0.47  |
| 3P27810_001             | 3P27817_001  | tandem     | 0.25 | 0.1  | 2.41  |
| 6P32040_001             | 6P32050_001  | tandem     | 1.21 | 0.47 | 2.56  |
| 9P02760_001             | 9P02765_001  | tandem     | 0.25 | 1.04 | 0.25  |
| 10P07100_001            | 10P07120_001 | tandem     | 0.21 | 0.63 | 0.34  |
| 1P14020_001             | 1P14030_001  | tandem     | 0.06 | 0.12 | 0.49  |
| 3P27790_001             | 3P27810_001  | tandem     | 0.11 | 0.13 | 0.8   |
| 3P22300_001             | 3P22310_001  | tandem     | 0.11 | 0.13 | 0.81  |
| 3P22250_001             | 3P22260_001  | tandem     | 0.1  | 0.12 | 0.83  |
| 10P24920_001            | 10P24940_001 | tandem     | 0.15 | 0.12 | 1.24  |
| 10P24910_001            | 10P24920_001 | tandem     | 0.14 | 0.18 | 0.76  |
| 10P07140_001            | 10P07150_001 | tandem     | 0.07 | 0.16 | 0.42  |
| 9P28020_001             | 9P28030_001  | tandem     | 0.11 | 0.15 | 0.75  |
| 3P22280_001             | 3P22290_001  | tandem     | 0.15 | 0.2  | 0.78  |
| 7P20230_001             | 7P20240_001  | tandem     | 0.08 | 0.07 | 1.27  |
| 7P20220_001             | 7P20230_001  | tandem     | 0.07 | 0.09 | 0.73  |
| 5P19520_001             | 9P19800_001  | transposed | -    | -    | -     |
| 7P12770_001             | 7P21400_001  | transposed | 1.25 | 2.22 | 0.57  |
| 1P04610_001             | 9P19800_001  | transposed | 0.64 | 3.93 | 0.16  |
| 9P02460_001             | 8P03665_001  | transposed | 0.63 | 1.17 | 0.54  |
| 3P28030_001             | 3P27790_001  | transposed | 0.11 | 0.13 | 0.84  |
| 2P11320_001             | 11P07440_001 | transposed | 0.53 | 1.79 | 0.3   |
| 0P25090_001             | 11P07440_001 | transposed | 0.54 | 0.22 | 2.46  |

|              |              |            |      |      |      |
|--------------|--------------|------------|------|------|------|
| 0P25100_001  | 10P07050_001 | transposed | 0.61 | 0.18 | 3.42 |
| 9P20610_001  | 10P07050_001 | transposed | 0.38 | 1.02 | 0.37 |
| 0P27050_001  | 3P27790_001  | transposed | 0.1  | 0.11 | 0.98 |
| 9P11390_001  | 3P09290_001  | transposed | 0.81 | 1.28 | 0.63 |
| 6P08580_001  | 9P17060_001  | transposed | 0.55 | 1.28 | 0.43 |
| 6P34690_001  | 6P21800_001  | transposed | 0.24 | 0.63 | 0.39 |
| 4P31030_001  | 6P21800_001  | transposed | 0.61 | 1.83 | 0.34 |
| 4P31030_001  | 9P11660_001  | transposed | 0.61 | 1.91 | 0.32 |
| 5P11640_001  | 10P29330_001 | transposed | 0.67 | 2.7  | 0.25 |
| 9P17310_001  | 10P29330_001 | transposed | 0.68 | 2.59 | 0.26 |
| 11P18580_001 | 9P11660_001  | transposed | 0.77 | 0.86 | 0.9  |
| 6P21780_001  | 6P19710_001  | transposed | 0.56 | 1.2  | 0.47 |
| 0P28160_001  | 3P22250_001  | transposed | 0.11 | 0.09 | 1.25 |
| 0P28220_001  | 3P22250_001  | transposed | 0.18 | 0.13 | 1.32 |
| 0P26110_001  | 3P22250_001  | transposed | 0.16 | 0.08 | 1.99 |
| 6P29800_001  | 5P04240_001  | transposed | 0.79 | 2.65 | 0.3  |
| 9P02520_001  | 4P28700_001  | transposed | 0.83 | 1.3  | 0.64 |
| 8P30710_001  | 9P12800_001  | transposed | 0.74 | 1.39 | 0.53 |
| 0P28310_001  | 3P27790_001  | transposed | 0.2  | 0.05 | 4.2  |
| 11P25110_001 | 10P29330_001 | transposed | -    | -    | -    |

<sup>a</sup>The name of *Musa acuminata* duplicated genes were abbreviated by dropping off the string of 'GSMUA\_Achr' compared with the original gene name.

**Supplementary Table 20.** Transcription factors across two *Musa* genomes and other related species

| TF family | Blast | Homolog search | <i>Musa itinerans</i> | <i>Musa acuminata</i> | <i>Phoenix dactylifera_v3</i> | <i>Arabidopsis thaliana</i> | <i>Vitis vinifera</i> | <i>Oryza sativa</i> |
|-----------|-------|----------------|-----------------------|-----------------------|-------------------------------|-----------------------------|-----------------------|---------------------|
| AP2       | 47    | 3              | <b>50</b>             | <b>49</b>             | 23                            | 30                          | 19                    | 22                  |
| ARF       | 42    | 9              | <b>51</b>             | <b>50</b>             | 22                            | 37                          | 17                    | 48                  |
| ARR-B     | 12    | 3              | <b>15</b>             | <b>14</b>             | 13                            | 21                          | 12                    | 11                  |
| B3        | 27    | 17             | <b>44</b>             | <b>40</b>             | 26                            | 77                          | 29                    | 65                  |
| BBR-BPC   | 9     | 3              | <b>12</b>             | <b>12</b>             | 7                             | 17                          | 5                     | 7                   |
| BES1      | 11    | 4              | <b>15</b>             | <b>12</b>             | 8                             | 14                          | 6                     | 6                   |
| bHLH      | 249   | 71             | <b>320</b>            | <b>298</b>            | 128                           | 225                         | 115                   | 211                 |
| bZIP      | 108   | 48             | <b>156</b>            | <b>135</b>            | 68                            | 127                         | 47                    | 140                 |
| C2H2      | 120   | 69             | <b>189</b>            | <b>174</b>            | 88                            | 116                         | 64                    | 135                 |
| C3H       | 54    | 19             | <b>73</b>             | <b>69</b>             | 46                            | 66                          | 43                    | 74                  |
| CAMTA     | 8     | 4              | <b>12</b>             | <b>13</b>             | 7                             | 10                          | 4                     | 7                   |
| CO-like   | 19    | 5              | <b>24</b>             | <b>24</b>             | 1                             | 22                          | 6                     | 21                  |
| CPP       | 8     | 1              | <b>9</b>              | <b>8</b>              | 5                             | 9                           | 6                     | 20                  |
| DBB       | 12    | 6              | <b>18</b>             | <b>17</b>             | 1                             | 14                          | 7                     | 13                  |
| Dof       | 53    | 37             | <b>90</b>             | <b>74</b>             | 19                            | 47                          | 22                    | 37                  |
| E2F/DP    | 9     | 2              | <b>11</b>             | <b>10</b>             | 7                             | 16                          | 7                     | 10                  |
| EIL       | 18    | 2              | <b>20</b>             | <b>16</b>             | 6                             | 6                           | 2                     | 11                  |
| ERF       | 123   | 145            | <b>268</b>            | <b>209</b>            | 55                            | 139                         | 80                    | 163                 |
| FAR1      | 19    | 14             | <b>33</b>             | <b>6</b>              | 48                            | 26                          | 18                    | 133                 |
| G2-like   | 94    | 16             | <b>110</b>            | <b>102</b>            | 51                            | 64                          | 40                    | 62                  |
| GATA      | 37    | 19             | <b>56</b>             | <b>51</b>             | 19                            | 41                          | 19                    | 32                  |
| GeBP      | 6     | 6              | <b>12</b>             | <b>12</b>             | 6                             | 23                          | 1                     | 13                  |

|             |     |    |            |            |     |     |     |     |
|-------------|-----|----|------------|------------|-----|-----|-----|-----|
| GRAS        | 58  | 21 | <b>79</b>  | <b>73</b>  | 42  | 37  | 43  | 69  |
| GRF         | 15  | 4  | <b>19</b>  | <b>18</b>  | 10  | 9   | 8   | 19  |
| HB-other    | 9   | 3  | <b>12</b>  | <b>12</b>  | 14  | 11  | 7   | 17  |
| HB-PHD      | 2   |    | <b>2</b>   | <b>2</b>   | 1   | 3   | 2   | 1   |
| HD-ZIP      | 89  | 10 | <b>99</b>  | <b>95</b>  | 38  | 58  | 33  | 61  |
| HRT-like    | 1   |    | <b>1</b>   | <b>1</b>   | 1   | 2   | 1   | 1   |
| HSF         | 28  | 15 | <b>43</b>  | <b>43</b>  | 19  | 25  | 19  | 38  |
| LBD         | 66  | 15 | <b>81</b>  | <b>72</b>  | 31  | 50  | 44  | 39  |
| LFY         | 1   |    | <b>1</b>   | <b>1</b>   | 2   | 1   | 1   | 2   |
| LSD         | 6   | 2  | <b>8</b>   | <b>7</b>   | 2   | 12  | 3   | 12  |
| MIKC        | 55  | 1  | <b>56</b>  | <b>59</b>  | 10  | 76  | 36  | 61  |
| M-type      | 20  | 15 | <b>35</b>  | <b>22</b>  | 36  | 70  | 18  | 35  |
| MYB         | 249 | 55 | <b>304</b> | <b>303</b> | 129 | 168 | 138 | 130 |
| MYB_related | 76  | 21 | <b>97</b>  | <b>82</b>  | 76  | 97  | 57  | 106 |
| NAC         | 153 | 21 | <b>174</b> | <b>167</b> | 124 | 138 | 71  | 170 |
| NF-X1       | 2   |    | <b>2</b>   | <b>2</b>   |     | 2   | 3   | 2   |
| NF-YA       | 15  |    | <b>15</b>  | <b>15</b>  | 8   | 21  | 7   | 25  |
| NF-YB       | 18  | 1  | <b>19</b>  | <b>19</b>  | 17  | 27  | 17  | 16  |
| NF-YC       | 17  | 1  | <b>18</b>  | <b>18</b>  | 11  | 21  | 8   | 19  |
| Nin-like    | 16  |    | <b>16</b>  | <b>17</b>  | 18  | 17  | 8   | 15  |
| NZZ/SPL     | 0   | 0  | <b>0</b>   | <b>0</b>   | 1   | 1   | 1   | 0   |
| RAV         | 14  | 2  | <b>16</b>  | <b>15</b>  | 1   | 7   | 1   | 4   |
| S1Fa-like   | 1   | 3  | <b>4</b>   | <b>3</b>   | 1   | 4   | 2   | 2   |
| SAP         | 3   | 1  | <b>4</b>   | <b>2</b>   | 1   | 1   | 1   | 0   |
| SBP         | 55  | 6  | <b>61</b>  | <b>58</b>  | 12  | 30  | 19  | 29  |
| SRS         | 7   | 3  | <b>10</b>  | <b>9</b>   | 1   | 16  | 5   | 6   |



|              |      |     |             |             |      |      |      |      |
|--------------|------|-----|-------------|-------------|------|------|------|------|
| STAT         | 1    | 0   | <b>1</b>    | <b>1</b>    | 0    | 4    | 1    | 1    |
| TALE         | 39   | 12  | <b>51</b>   | <b>47</b>   | 28   | 33   | 21   | 45   |
| TCP          | 26   | 21  | <b>47</b>   | <b>45</b>   | 8    | 33   | 15   | 23   |
| Trihelix     | 28   | 32  | <b>60</b>   | <b>55</b>   | 24   | 34   | 26   | 40   |
| VOZ          | 4    | 1   | <b>5</b>    | <b>5</b>    | 2    | 3    | 2    | 2    |
| Whirly       | 3    | 0   | <b>3</b>    | <b>3</b>    | 2    | 4    | 2    | 2    |
| WOX          | 21   | 5   | <b>26</b>   | <b>27</b>   | 16   | 18   | 11   | 17   |
| WRKY         | 122  | 31  | <b>153</b>  | <b>153</b>  | 78   | 90   | 59   | 128  |
| YABBY        | 23   | 2   | <b>25</b>   | <b>25</b>   | 3    | 8    | 7    | 15   |
| ZF-HD        | 16   | 15  | <b>31</b>   | <b>27</b>   | 5    | 18   | 10   | 15   |
| <b>Total</b> | 2343 | 833 | <b>3176</b> | <b>2898</b> | 1426 | 2296 | 1276 | 2408 |

---

**Supplementary Table 21** List of MYB transcription factor genes for two *Musa* species

| <i>Musa acuminata</i>     |                        |      | <i>Musa itinerans</i>       |                           |        |
|---------------------------|------------------------|------|-----------------------------|---------------------------|--------|
| MYB genes                 | position of domain     | Type | MYB genes                   | positions of domain       | Type   |
| 10P19840_001 <sup>a</sup> | 18 67 <sup>b</sup>     | 1R   | 5P17010_001_D1 <sup>c</sup> | 14 63                     | 1R     |
| 11P07660_001              | 14 64                  | 1R   | Mi_g009970                  | 5 54                      | 1R     |
| 4P06410_001               | 65 112                 | 1R   | Mi_g008629                  | 14 64                     | 1R     |
| 4P13280_001               | 64 111                 | 1R   | Mi_g005375                  | 14 64                     | 1R     |
| 5P07380_001               | 25 87                  | 1R   | 4P06410_001_D1              | 65 112                    | 1R     |
| 5P10690_001               | 14 64                  | 1R   | 5P07380_001_D1              | 24 86                     | 1R     |
| 5P17010_001               | 14 63                  | 1R   | 5P21840_001_D1              | 14 114                    | 1R     |
| 6P30830_001               | 14 64                  | 1R   | Mi_g005112                  | 21 69                     | 1R     |
| 7P21550_001               | 41 90                  | 1R   | Mi_g017587                  | 14 64                     | 1R     |
| 8P18460_001               | 5 54                   | 1R   | Mi_g007855                  | 41 90                     | 1R     |
| 9P17000_001               | 87 135                 | 1R   | 8P14190_001_D2              | 34 80                     | 1R     |
| Un_randomP10790_001       | 14 64                  | 1R   | Mi_g000673                  | 13 63                     | 1R     |
| Un_randomP21150_001       | 17 92                  | 1R   | Mi_g000872                  | 14 64                     | 1R     |
| Un_randomP22350_001       | 70 117                 | 1R   | Mi_g012547                  | 35 83                     | 1R     |
| 10P14840_001              | 41 89 93 141 145 192   | 3R   | Mi_g029930                  | 67 115 119 167<br>171 218 | R1R2R3 |
| 10P26610_001              | 67 115 119 167 171 218 | 3R   | Mi_g008651                  | 36 84 88 136 140<br>187   | R1R2R3 |
| 2P03880_001               | 36 84 88 136 140 187   | 3R   | 6P05030_001_D2              | 56 104 108 156            | R1R2R3 |

|              |                                    |      |                 |                                       |        |
|--------------|------------------------------------|------|-----------------|---------------------------------------|--------|
| 2P19890_001  | 47 95 99 147 151 198               | 3R   | Mi_g020828      | 160 207<br>319 365 371 418<br>423 467 | R1R2R3 |
| 3P01370_001  | 5 54 22 71 75 118                  | 3R   | Mi_g001538      | 794 842 846 894<br>898 945            | R1R2R3 |
| 6P05030_001  | 56 104 108 156 160 207             | 3R   | 10P19970_001_D1 | 14 63 67 114                          | R2R3   |
| 6P31410_001  | 340 386 392 439 444 488            | 3R   | 10P26730_001_D1 | 8 57 61 108                           | R2R3   |
| 7P10520_001  | 795 843 847 895 899 946            | 3R   | Mi_g017415      | 187 235 242 286                       | R2R3   |
| 9P10150_001  | 172 219 223 271 277 324<br>329 373 | 4R   | Mi_g025663      | 14 63 68 114                          | R2R3   |
| 10P00770_001 | 184 232 239 283                    | R2R3 | Mi_g005920      | 14 63 67 114                          | R2R3   |
| 10P01620_001 | 14 63 67 114                       | R2R3 | Mi_g000908      | 31 77 136 185                         | R2R3   |
| 10P01640_001 | 14 63 67 114                       | R2R3 | Mi_g015857      | 39 88 97 139                          | R2R3   |
| 10P02290_001 | 31 77 136 185                      | R2R3 | Mi_g007998      | 39 88 97 139                          | R2R3   |
| 10P03710_001 | 10 59 63 110                       | R2R3 | Mi_g011792      | 26 74 78 125                          | R2R3   |
| 10P04590_001 | 51 100 104 151                     | R2R3 | Mi_g017225      | 14 63 67 112                          | R2R3   |
| 10P05080_001 | 63 111 115 162                     | R2R3 | Mi_g012174      | 14 68 72 119                          | R2R3   |
| 10P06880_001 | 11 59 80 127                       | R2R3 | Mi_g009075      | 14 78 82 129                          | R2R3   |
| 10P08070_001 | 14 63 67 114                       | R2R3 | Mi_g016283      | 14 63 67 114                          | R2R3   |
| 10P08350_001 | 14 64 71 115                       | R2R3 | Mi_g008837      | 15 64 68 115                          | R2R3   |
| 10P10800_001 | 19 67 71 118                       | R2R3 | Mi_g011643      | 14 63 67 114                          | R2R3   |
| 10P12830_001 | 78 126 141 177                     | R2R3 | Mi_g005860      | 8 57 61 108                           | R2R3   |
| 10P13520_001 | 15 64 68 115                       | R2R3 | Mi_g031435      | 6 55 59 106                           | R2R3   |
| 10P14030_001 | 39 88 97 139                       | R2R3 | Mi_g016052      | 14 63 68 114                          | R2R3   |
| 10P16010_001 | 14 63 67 114                       | R2R3 | Mi_g012551      | 14 63 67 114                          | R2R3   |
| 10P17610_001 | 14 63 67 112                       | R2R3 | Mi_g026137      | 14 63 71 114                          | R2R3   |

|              |                |      |                 |                |      |
|--------------|----------------|------|-----------------|----------------|------|
| 10P18880_001 | 29 75 79 126   | R2R3 | Mi_g028484      | 14 63 71 114   | R2R3 |
| 10P19130_001 | 14 63 67 114   | R2R3 | Mi_g013052      | 14 63 71 114   | R2R3 |
| 10P19970_001 | 14 63 67 114   | R2R3 | Mi_g010260      | 14 63 71 114   | R2R3 |
| 10P24560_001 | 14 63 67 114   | R2R3 | Mi_g030451      | 14 63 71 114   | R2R3 |
| 10P25700_001 | 14 68 72 119   | R2R3 | 11P07850_001_D1 | 15 64 68 115   | R2R3 |
| 10P26730_001 | 8 57 61 108    | R2R3 | 11P13080_001_D1 | 14 63 67 114   | R2R3 |
| 10P29210_001 | 68 114 14 63   | R2R3 | 11P13200_001_D2 | 18 67 71 114   | R2R3 |
| 10P29280_001 | 63 127 10 59   | R2R3 | 11P22820_001_D1 | 14 63 67 114   | R2R3 |
| 10P29680_001 | 14 63 67 114   | R2R3 | Mi_g020713      | 14 63 67 114   | R2R3 |
| 10P29970_001 | 71 114 14 63   | R2R3 | Mi_g006153      | 14 63 67 114   | R2R3 |
| 11P00410_001 | 14 63 67 114   | R2R3 | Mi_g007232      | 53 101 105 152 | R2R3 |
| 11P02410_001 | 17 66 70 117   | R2R3 | Mi_g017949      | 48 96 100 147  | R2R3 |
| 11P04090_001 | 14 63 67 114   | R2R3 | Mi_g005370      | 18 73 77 120   | R2R3 |
| 11P04930_001 | 15 64 68 111   | R2R3 | Mi_g015986      | 18 67 71 114   | R2R3 |
| 11P07180_001 | 14 63 67 114   | R2R3 | Mi_g005722      | 5 54 58 101    | R2R3 |
| 11P07850_001 | 15 64 68 115   | R2R3 | Mi_g031532      | 16 65 69 116   | R2R3 |
| 11P09110_001 | 12 61 75 124   | R2R3 | Mi_g012944      | 23 72 76 119   | R2R3 |
| 11P09160_001 | 53 101 105 152 | R2R3 | Mi_g028165      | 22 71 76 122   | R2R3 |
| 11P10490_001 | 91 139 143 190 | R2R3 | Mi_g016435      | 33 82 87 133   | R2R3 |
| 11P13080_001 | 14 63 67 114   | R2R3 | 1P09180_001_D1  | 14 63 67 114   | R2R3 |
| 11P13200_001 | 18 73 77 120   | R2R3 | 1P22380_001_D1  | 14 63 71 114   | R2R3 |
| 11P15910_001 | 14 63 67 114   | R2R3 | 1P26140_001_D1  | 15 63 68 114   | R2R3 |
| 11P16130_001 | 19 68 72 115   | R2R3 | Mi_g015151      | 41 90 97 142   | R2R3 |
| 11P17190_001 | 69 116 16 65   | R2R3 | Mi_g019853      | 16 65 69 116   | R2R3 |
| 11P17870_001 | 16 65 69 116   | R2R3 | Mi_g020932      | 5 54 58 105    | R2R3 |
| 11P20830_001 | 23 72 76 119   | R2R3 | Mi_g029097      | 10 59 63 110   | R2R3 |

|              |                |      |                 |                |      |
|--------------|----------------|------|-----------------|----------------|------|
| 11P22820_001 | 14 63 67 114   | R2R3 | Mi_g009254      | 14 64 71 115   | R2R3 |
| 11P23430_001 | 14 63 67 114   | R2R3 | Mi_g029043      | 17 65 70 116   | R2R3 |
| 11P23500_001 | 18 67 71 118   | R2R3 | Mi_g016194      | 11 59 118 165  | R2R3 |
| 11P24690_001 | 28 77 82 128   | R2R3 | Mi_g020057      | 7 56 60 103    | R2R3 |
| 11P25100_001 | 38 86 90 137   | R2R3 | Mi_g028580      | 14 63 67 114   | R2R3 |
| 1P01660_001  | 39 88 95 140   | R2R3 | Mi_g031463      | 14 63 67 114   | R2R3 |
| 1P02420_001  | 14 63 67 114   | R2R3 | Mi_g022835      | 15 64 68 111   | R2R3 |
| 1P03140_001  | 14 64 69 115   | R2R3 | 2P01830_001_D1  | 14 63 67 114   | R2R3 |
| 1P03450_001  | 16 65 69 116   | R2R3 | 2P11450_001_D3  | 15 64 69 115   | R2R3 |
| 1P04910_001  | 14 64 71 115   | R2R3 | Mi_g013983      | 27 76 80 127   | R2R3 |
| 1P07550_001  | 51 100 104 151 | R2R3 | Mi_g022486      | 21 70 74 121   | R2R3 |
| 1P09180_001  | 14 63 67 114   | R2R3 | Mi_g022485      | 21 70 74 121   | R2R3 |
| 1P09750_001  | 17 65 70 116   | R2R3 | Mi_g026023      | 13 62 66 113   | R2R3 |
| 1P17150_001  | 71 120 124 171 | R2R3 | Mi_g015591      | 14 63 67 114   | R2R3 |
| 1P17480_001  | 5 54 58 122    | R2R3 | Mi_g023573      | 15 64 109 141  | R2R3 |
| 1P17730_001  | 11 59 118 165  | R2R3 | Mi_g018991      | 15 64 68 134   | R2R3 |
| 1P18610_001  | 14 63 71 114   | R2R3 | Mi_g028414      | 15 64 68 138   | R2R3 |
| 1P21020_001  | 18 67 71 114   | R2R3 | Mi_g031056      | 14 63 67 114   | R2R3 |
| 1P23990_001  | 14 63 67 114   | R2R3 | Mi_g011516      | 20 69 73 120   | R2R3 |
| 1P24960_001  | 17 66 70 113   | R2R3 | Mi_g011505      | 16 65 69 116   | R2R3 |
| 1P26140_001  | 15 63 68 114   | R2R3 | Mi_g013106      | 16 65 69 116   | R2R3 |
| 1P26520_001  | 14 63 67 114   | R2R3 | 3P01370_001_D24 | 5 54 58 90     | R2R3 |
| 1P27270_001  | 15 64 68 111   | R2R3 | 3P07950_001_D1  | 15 64 68 115   | R2R3 |
| 2P01830_001  | 14 63 67 114   | R2R3 | 3P09450_001_D1  | 14 63 67 114   | R2R3 |
| 2P02970_001  | 14 63 67 114   | R2R3 | 3P18970_001_D1  | 18 66 70 117   | R2R3 |
| 2P04200_001  | 14 64 69 115   | R2R3 | 3P21000_001_D1  | 77 126 130 177 | R2R3 |

|             |                 |      |                |                 |      |
|-------------|-----------------|------|----------------|-----------------|------|
| 2P04730_001 | 15 64 68 115    | R2R3 | 3P21060_001_D1 | 18 67 71 114    | R2R3 |
| 2P07780_001 | 27 76 80 127    | R2R3 | 3P22200_001_D4 | 14 63 67 114    | R2R3 |
| 2P11450_001 | 15 73 80 143    | R2R3 | 3P28230_001_D1 | 5 53 58 104     | R2R3 |
| 2P14770_001 | 14 63 67 111    | R2R3 | 3P28540_001_D1 | 14 63 67 114    | R2R3 |
| 2P16200_001 | 5 54 58 105     | R2R3 | Mi_g029488     | 14 63 67 114    | R2R3 |
| 2P17960_001 | 20 69 73 120    | R2R3 | Mi_g022136     | 14 63 67 114    | R2R3 |
| 2P18090_001 | 16 65 69 116    | R2R3 | Mi_g029523     | 23 72 76 119    | R2R3 |
| 2P19380_001 | 3 52 57 103     | R2R3 | Mi_g005621     | 132 180 185 231 | R2R3 |
| 2P20600_001 | 14 63 67 114    | R2R3 | Mi_g024573     | 69 108 112 157  | R2R3 |
| 2P22010_001 | 14 63 67 114    | R2R3 | Mi_g028191     | 14 63 67 114    | R2R3 |
| 3P06470_001 | 14 63 67 114    | R2R3 | Mi_g003668     | 14 63 67 114    | R2R3 |
| 3P07700_001 | 4 52 56 103     | R2R3 | Mi_g030419     | 14 63 67 114    | R2R3 |
| 3P07940_001 | 14 63 67 114    | R2R3 | Mi_g005533     | 14 63 70 114    | R2R3 |
| 3P07950_001 | 15 64 68 115    | R2R3 | Mi_g009976     | 23 72 76 123    | R2R3 |
| 3P08370_001 | 23 72 76 119    | R2R3 | Mi_g024042     | 14 63 67 114    | R2R3 |
| 3P09050_001 | 132 180 185 231 | R2R3 | Mi_g019328     | 14 63 67 114    | R2R3 |
| 3P09450_001 | 14 63 67 114    | R2R3 | Mi_g031735     | 3 51 56 100     | R2R3 |
| 3P09490_001 | 80 128 132 179  | R2R3 | 4P19880_001_D1 | 14 63 74 114    | R2R3 |
| 3P10060_001 | 14 63 70 114    | R2R3 | 4P20150_001_D1 | 17 65 70 116    | R2R3 |
| 3P12730_001 | 6 55 59 102     | R2R3 | 4P25710_001_D1 | 17 66 70 122    | R2R3 |
| 3P13070_001 | 21 69 74 120    | R2R3 | 4P28090_001_D1 | 14 64 68 115    | R2R3 |
| 3P16490_001 | 20 68 72 114    | R2R3 | 4P28850_001_D1 | 16 65 69 116    | R2R3 |
| 3P18970_001 | 18 66 70 117    | R2R3 | Mi_g020049     | 17 66 70 144    | R2R3 |
| 3P19490_001 | 23 78 82 127    | R2R3 | Mi_g001029     | 20 68 73 119    | R2R3 |
| 3P21000_001 | 77 126 130 177  | R2R3 | Mi_g007661     | 20 68 73 119    | R2R3 |
| 3P21060_001 | 18 67 71 114    | R2R3 | Mi_g010968     | 23 70 75 121    | R2R3 |

|             |              |      |                |               |      |
|-------------|--------------|------|----------------|---------------|------|
| 3P22200_001 | 14 63 67 114 | R2R3 | Mi_g008865     | 14 63 67 114  | R2R3 |
| 3P24580_001 | 14 63 67 114 | R2R3 | Mi_g003265     | 14 63 67 114  | R2R3 |
| 3P27700_001 | 14 63 67 114 | R2R3 | Mi_g030561     | 14 63 67 114  | R2R3 |
| 3P28230_001 | 5 53 58 104  | R2R3 | Mi_g000657     | 14 63 67 114  | R2R3 |
| 3P28540_001 | 14 63 67 114 | R2R3 | Mi_g004164     | 14 63 67 114  | R2R3 |
| 4P00480_001 | 13 62 66 113 | R2R3 | Mi_g016970     | 14 63 67 114  | R2R3 |
| 4P01050_001 | 14 64 71 115 | R2R3 | Mi_g009559     | 15 64 68 115  | R2R3 |
| 4P05410_001 | 17 66 70 153 | R2R3 | Mi_g008508     | 14 63 71 114  | R2R3 |
| 4P09450_001 | 20 68 73 119 | R2R3 | Mi_g008694     | 19 68 72 119  | R2R3 |
| 4P11960_001 | 17 75 79 134 | R2R3 | Mi_g012524     | 19 68 72 119  | R2R3 |
| 4P12950_001 | 6 53 58 104  | R2R3 | Mi_g012626     | 30 77 81 128  | R2R3 |
| 4P18180_001 | 14 63 67 114 | R2R3 | Mi_g000080     | 3 52 56 103   | R2R3 |
| 4P19030_001 | 14 63 67 114 | R2R3 | Mi_g001931     | 17 66 70 117  | R2R3 |
| 4P19560_001 | 14 63 67 114 | R2R3 | Mi_g020623     | 14 64 71 115  | R2R3 |
| 4P19880_001 | 14 63 71 114 | R2R3 | Mi_g018597     | 14 64 69 111  | R2R3 |
| 4P19990_001 | 6 55 59 102  | R2R3 | 5P12230_001_D1 | 14 63 67 114  | R2R3 |
| 4P20150_001 | 17 65 70 116 | R2R3 | 5P23110_001_D1 | 14 63 71 114  | R2R3 |
| 4P21700_001 | 20 69 73 120 | R2R3 | 5P23240_001_D1 | 14 63 67 114  | R2R3 |
| 4P21910_001 | 5 54 58 105  | R2R3 | 5P28940_001_D1 | 30 79 132 181 | R2R3 |
| 4P23690_001 | 19 68 72 119 | R2R3 | Mi_g003787     | 14 64 71 115  | R2R3 |
| 4P25260_001 | 14 64 69 115 | R2R3 | Mi_g029851     | 14 64 71 115  | R2R3 |
| 4P25340_001 | 15 64 69 115 | R2R3 | Mi_g012470     | 14 64 71 115  | R2R3 |
| 4P25710_001 | 17 66 70 122 | R2R3 | Mi_g025517     | 16 65 69 116  | R2R3 |
| 4P27350_001 | 17 66 70 117 | R2R3 | Mi_g025554     | 14 63 67 114  | R2R3 |
| 4P28090_001 | 14 64 68 115 | R2R3 | Mi_g008709     | 14 63 67 114  | R2R3 |
| 4P28850_001 | 16 65 69 116 | R2R3 | Mi_g008708     | 14 63 67 114  | R2R3 |

|             |                |      |                |                |      |
|-------------|----------------|------|----------------|----------------|------|
| 4P29230_001 | 18 67 71 118   | R2R3 | Mi_g008710     | 14 63 67 114   | R2R3 |
| 4P29410_001 | 15 64 68 115   | R2R3 | Mi_g023340     | 14 63 67 114   | R2R3 |
| 4P32240_001 | 14 64 71 115   | R2R3 | Mi_g030163     | 13 62 66 113   | R2R3 |
| 5P01180_001 | 14 63 67 114   | R2R3 | Mi_g031658     | 20 69 74 120   | R2R3 |
| 5P01930_001 | 14 64 71 115   | R2R3 | Mi_g031159     | 14 63 67 114   | R2R3 |
| 5P03520_001 | 16 65 69 116   | R2R3 | Mi_g005086     | 10 59 64 110   | R2R3 |
| 5P03920_001 | 14 63 67 114   | R2R3 | Mi_g015904     | 3 52 57 103    | R2R3 |
| 5P05910_001 | 14 63 71 114   | R2R3 | Mi_g016607     | 32 79 135 184  | R2R3 |
| 5P06530_001 | 35 84 88 135   | R2R3 | Mi_g012310     | 20 68 128 177  | R2R3 |
| 5P07720_001 | 14 63 68 114   | R2R3 | Mi_g031711     | 5 51 102 151   | R2R3 |
| 5P09280_001 | 14 64 69 115   | R2R3 | Mi_g005137     | 4 55 59 106    | R2R3 |
| 5P12230_001 | 14 63 67 114   | R2R3 | 6P09620_001_D1 | 13 62 66 113   | R2R3 |
| 5P14600_001 | 13 62 66 113   | R2R3 | 6P09760_001_D2 | 18 67 71 114   | R2R3 |
| 5P18080_001 | 14 63 67 114   | R2R3 | 6P09760_001_D4 | 7 56 60 103    | R2R3 |
| 5P18600_001 | 14 63 67 114   | R2R3 | 6P10700_001_D1 | 14 63 67 114   | R2R3 |
| 5P21090_001 | 18 67 71 114   | R2R3 | 6P15370_001_D1 | 4 53 57 104    | R2R3 |
| 5P21250_001 | 14 63 67 114   | R2R3 | 6P17630_001_D1 | 18 66 70 117   | R2R3 |
| 5P21840_001 | 14 63 71 115   | R2R3 | 6P19410_001_D2 | 20 56 83 132   | R2R3 |
| 5P22760_001 | 14 64 71 115   | R2R3 | 6P29310_001_D2 | 12 61 65 112   | R2R3 |
| 5P23110_001 | 14 63 71 114   | R2R3 | 6P31520_001_D1 | 16 65 69 116   | R2R3 |
| 5P23240_001 | 14 63 67 114   | R2R3 | 6P35800_001_D1 | 14 63 67 114   | R2R3 |
| 5P23290_001 | 81 129 133 180 | R2R3 | Mi_g022049     | 14 63 67 114   | R2R3 |
| 5P26000_001 | 14 63 67 114   | R2R3 | Mi_g021008     | 81 129 133 180 | R2R3 |
| 5P27750_001 | 22 70 74 121   | R2R3 | Mi_g003034     | 14 63 67 114   | R2R3 |
| 5P28350_001 | 10 59 64 110   | R2R3 | Mi_g010355     | 15 63 67 114   | R2R3 |
| 5P28780_001 | 21 69 73 120   | R2R3 | Mi_g007720     | 86 125 129 174 | R2R3 |



|             |                |      |                |                 |      |
|-------------|----------------|------|----------------|-----------------|------|
| 5P28940_001 | 30 79 132 181  | R2R3 | Mi_g014262     | 33 82 86 133    | R2R3 |
| 5P29070_001 | 4 55 59 106    | R2R3 | Mi_g019039     | 31 77 81 128    | R2R3 |
| 6P01850_001 | 14 64 71 115   | R2R3 | Mi_g016259     | 30 76 80 127    | R2R3 |
| 6P02530_001 | 14 63 67 114   | R2R3 | Mi_g014574     | 20 68 72 119    | R2R3 |
| 6P02550_001 | 14 63 67 114   | R2R3 | Mi_g027225     | 14 63 67 114    | R2R3 |
| 6P02580_001 | 90 138 142 189 | R2R3 | Mi_g008329     | 14 63 67 114    | R2R3 |
| 6P02690_001 | 14 63 67 114   | R2R3 | Mi_g006309     | 14 63 67 114    | R2R3 |
| 6P04130_001 | 14 63 67 114   | R2R3 | Mi_g002791     | 14 64 71 115    | R2R3 |
| 6P04400_001 | 14 63 67 114   | R2R3 | Mi_g021477     | 66 114 129 165  | R2R3 |
| 6P06490_001 | 89 124 128 173 | R2R3 | Mi_g006425     | 78 126 141 177  | R2R3 |
| 6P06800_001 | 35 84 88 135   | R2R3 | Mi_g026784     | 67 115 130 166  | R2R3 |
| 6P07260_001 | 36 85 89 136   | R2R3 | Mi_g027397     | 42 90 94 141    | R2R3 |
| 6P09620_001 | 13 62 66 113   | R2R3 | Mi_g009786     | 31 79 83 130    | R2R3 |
| 6P09760_001 | 19 68 72 115   | R2R3 | Mi_g005585     | 68 116 120 167  | R2R3 |
| 6P10650_001 | 31 77 81 128   | R2R3 | Mi_g024243     | 52 100 104 151  | R2R3 |
| 6P10700_001 | 14 63 67 114   | R2R3 | Mi_g004323     | 114 162 169 213 | R2R3 |
| 6P12930_001 | 14 63 67 114   | R2R3 | Mi_g008562     | 14 63 67 114    | R2R3 |
| 6P14840_001 | 22 71 80 122   | R2R3 | Mi_g007306     | 14 63 67 114    | R2R3 |
| 6P15370_001 | 4 53 57 104    | R2R3 | 7P05570_001_D1 | 28 76 80 123    | R2R3 |
| 6P15900_001 | 51 99 114 150  | R2R3 | 7P21550_001_D5 | 41 90 94 123    | R2R3 |
| 6P17630_001 | 18 66 70 117   | R2R3 | Mi_g006832     | 14 63 71 114    | R2R3 |
| 6P25420_001 | 14 63 67 114   | R2R3 | Mi_g017465     | 4 52 56 103     | R2R3 |
| 6P27290_001 | 24 73 77 120   | R2R3 | Mi_g004448     | 13 62 66 113    | R2R3 |
| 6P29310_001 | 14 63 67 114   | R2R3 | Mi_g031010     | 8 57 61 108     | R2R3 |
| 6P31520_001 | 16 65 69 116   | R2R3 | Mi_g013023     | 116 164 168 215 | R2R3 |
| 6P31740_001 | 14 64 71 115   | R2R3 | Mi_g022053     | 90 138 142 189  | R2R3 |

|             |                  |      |                |                 |      |
|-------------|------------------|------|----------------|-----------------|------|
| 6P32250_001 | 66 114 129 165   | R2R3 | Mi_g013025     | 48 97 101 148   | R2R3 |
| 6P32970_001 | 788 834 996 1033 | R2R3 | Mi_g013038     | 14 63 67 114    | R2R3 |
| 6P33470_001 | 118 166 170 217  | R2R3 | Mi_g013039     | 14 63 67 114    | R2R3 |
| 6P33620_001 | 61 109 125 174   | R2R3 | Mi_g012608     | 14 64 71 115    | R2R3 |
| 6P33700_001 | 120 168 175 219  | R2R3 | Mi_g023093     | 14 64 71 115    | R2R3 |
| 6P35800_001 | 14 63 67 114     | R2R3 | Mi_g010269     | 14 64 71 115    | R2R3 |
| 6P36930_001 | 14 63 67 114     | R2R3 | Mi_g026997     | 14 64 68 115    | R2R3 |
| 7P00280_001 | 2 38 42 89       | R2R3 | Mi_g005275     | 14 64 69 111    | R2R3 |
| 7P05570_001 | 28 76 80 123     | R2R3 | Mi_g023833     | 14 63 67 114    | R2R3 |
| 7P05680_001 | 14 63 71 114     | R2R3 | Mi_g023839     | 15 63 67 114    | R2R3 |
| 7P08150_001 | 14 64 69 111     | R2R3 | Mi_g028992     | 14 64 71 115    | R2R3 |
| 7P10550_001 | 4 55 59 106      | R2R3 | Mi_g015962     | 14 64 71 115    | R2R3 |
| 7P11320_001 | 4 52 56 103      | R2R3 | Mi_g016662     | 14 64 71 115    | R2R3 |
| 7P12520_001 | 14 63 71 114     | R2R3 | 8P25220_001_D1 | 12 59 66 110    | R2R3 |
| 7P13700_001 | 19 68 72 119     | R2R3 | Mi_g031709     | 128 176 183 227 | R2R3 |
| 7P18080_001 | 14 63 67 114     | R2R3 | Mi_g031628     | 37 85 142 191   | R2R3 |
| 7P18200_001 | 8 57 61 108      | R2R3 | Mi_g031627     | 22 68 112 161   | R2R3 |
| 7P18390_001 | 116 164 168 215  | R2R3 | Mi_g017837     | 10 59 64 110    | R2R3 |
| 7P18410_001 | 48 97 101 148    | R2R3 | Mi_g015447     | 10 59 63 110    | R2R3 |
| 7P18550_001 | 14 63 67 114     | R2R3 | Mi_g019957     | 14 63 67 114    | R2R3 |
| 7P18560_001 | 14 63 67 114     | R2R3 | Mi_g012710     | 14 63 67 114    | R2R3 |
| 7P18680_001 | 14 63 71 125     | R2R3 | Mi_g028070     | 14 63 67 114    | R2R3 |
| 7P19530_001 | 14 64 71 115     | R2R3 | Mi_g017600     | 14 64 69 115    | R2R3 |
| 7P21010_001 | 14 63 67 114     | R2R3 | Mi_g009692     | 14 64 69 115    | R2R3 |
| 7P21670_001 | 14 63 67 114     | R2R3 | Mi_g030276     | 14 64 69 115    | R2R3 |
| 7P21740_001 | 16 64 68 115     | R2R3 | Mi_g032408     | 21 70 74 119    | R2R3 |

|             |                 |      |                |                   |      |
|-------------|-----------------|------|----------------|-------------------|------|
| 7P25060_001 | 14 64 71 115    | R2R3 | Mi_g018396     | 18 67 71 118      | R2R3 |
| 8P01400_001 | 14 63 67 114    | R2R3 | Mi_g015554     | 14 63 67 114      | R2R3 |
| 8P02260_001 | 15 64 79 128    | R2R3 | Mi_g021391     | 14 63 67 114      | R2R3 |
| 8P02290_001 | 129 177 184 228 | R2R3 | Mi_g004953     | 12 60 65 111      | R2R3 |
| 8P02370_001 | 19 65 109 158   | R2R3 | Mi_g026899     | 54 104 111 157    | R2R3 |
| 8P02380_001 | 38 85 142 191   | R2R3 | Mi_g028617     | 10 59 63 110      | R2R3 |
| 8P02640_001 | 10 59 64 110    | R2R3 | 9P03720_001_D2 | 5 53 57 104       | R2R3 |
| 8P03510_001 | 13 62 66 113    | R2R3 | 9P08480_001_D1 | 18 66 70 117      | R2R3 |
| 8P10470_001 | 14 63 67 114    | R2R3 | 9P08480_001_D2 | 20 68 72 116      | R2R3 |
| 8P10800_001 | 23 72 76 119    | R2R3 | 9P12180_001_D1 | 14 63 67 114      | R2R3 |
| 8P11340_001 | 15 64 68 115    | R2R3 | 9P22190_001_D1 | 14 64 68 115      | R2R3 |
| 8P12710_001 | 17 66 70 117    | R2R3 | Mi_g026489     | 6 54 58 105       | R2R3 |
| 8P14190_001 | 14 64 69 115    | R2R3 | Mi_g026546     | 798 844 1011 1049 | R2R3 |
| 8P14540_001 | 21 70 74 119    | R2R3 | Mi_g021425     | 792 838 1000 1037 | R2R3 |
| 8P16920_001 | 15 64 68 100    | R2R3 | Mi_g005961     | 69 118 122 165    | R2R3 |
| 8P22690_001 | 14 63 67 114    | R2R3 | Mi_g001779     | 14 63 67 114      | R2R3 |
| 8P24780_001 | 14 64 68 115    | R2R3 | Mi_g026681     | 14 63 67 114      | R2R3 |
| 8P25220_001 | 12 59 66 110    | R2R3 | Mi_g008186     | 14 63 67 114      | R2R3 |
| 8P25970_001 | 66 116 123 169  | R2R3 | 9P08600_001_D4 | 14 63 67 114      | R2R3 |
| 8P29910_001 | 23 72 76 119    | R2R3 | Mi_g001320     | 14 63 67 114      | R2R3 |
| 8P31350_001 | 21 70 74 121    | R2R3 | Mi_g023815     | 14 63 67 114      | R2R3 |
| 8P32480_001 | 14 63 67 114    | R2R3 | Mi_g023814     | 14 63 67 114      | R2R3 |
| 8P33900_001 | 14 63 67 114    | R2R3 | Mi_g019901     | 14 63 67 114      | R2R3 |
| 8P34340_001 | 10 59 63 110    | R2R3 | Mi_g007849     | 13 62 66 113      | R2R3 |
| 9P03320_001 | 4 55 59 100     | R2R3 | Mi_g013221     | 13 62 66 113      | R2R3 |
| 9P03720_001 | 6 54 58 105     | R2R3 | Mi_g022821     | 13 63 67 114      | R2R3 |

|             |                   |      |            |               |      |
|-------------|-------------------|------|------------|---------------|------|
| 9P04400_001 | 798 844 1011 1049 | R2R3 | Mi_g014953 | 4 52 56 98    | R2R3 |
| 9P04990_001 | 47 95 99 146      | R2R3 | Mi_g029471 | 4 52 56 103   | R2R3 |
| 9P07000_001 | 69 118 122 165    | R2R3 | Mi_g028730 | 14 63 67 114  | R2R3 |
| 9P08480_001 | 18 66 70 117      | R2R3 | Mi_g005795 | 1 48 107 154  | R2R3 |
| 9P08600_001 | 14 63 67 114      | R2R3 | Mi_g020867 | 7 55 59 103   | R2R3 |
| 9P09790_001 | 14 64 71 115      | R2R3 | Mi_g019547 | 12 59 110 157 | R2R3 |
| 9P11190_001 | 13 62 66 113      | R2R3 | Mi_g005856 | 4 55 59 106   | R2R3 |
| 9P12180_001 | 14 63 67 114      | R2R3 | Mi_g001537 | 4 55 59 106   | R2R3 |
| 9P13610_001 | 14 64 69 111      | R2R3 | Mi_g006673 | 4 52 56 103   | R2R3 |
| 9P14850_001 | 14 63 67 114      | R2R3 | Mi_g005731 | 14 63 67 114  | R2R3 |
| 9P15640_001 | 14 63 71 114      | R2R3 | Mi_g030664 | 14 64 69 115  | R2R3 |
| 9P15750_001 | 4 52 56 98        | R2R3 | Mi_g006834 | 10 59 67 110  | R2R3 |
| 9P16040_001 | 14 63 67 114      | R2R3 | Mi_g006538 | 2 51 55 102   | R2R3 |
| 9P16640_001 | 23 72 76 119      | R2R3 | Mi_g022051 | 14 63 67 114  | R2R3 |
| 9P17050_001 | 14 63 67 112      | R2R3 | Mi_g007343 | 11 60 64 111  | R2R3 |
| 9P19380_001 | 4 55 59 106       | R2R3 | Mi_g024178 | 7 56 60 103   | R2R3 |
| 9P20620_001 | 53 103 119 166    | R2R3 | Mi_g021826 | 7 56 60 103   | R2R3 |
| 9P21870_001 | 15 82 137 184     | R2R3 | Mi_g024675 | 3 52 56 103   | R2R3 |
| 9P22190_001 | 14 64 68 115      | R2R3 | Mi_g032081 | 3 52 56 103   | R2R3 |
| 9P22600_001 | 5 53 58 104       | R2R3 | Mi_g002140 | 17 66 70 117  | R2R3 |
| 9P23340_001 | 7 55 59 103       | R2R3 | Mi_g026115 | 14 63 67 114  | R2R3 |
| 9P23760_001 | 12 59 110 157     | R2R3 | Mi_g003850 | 14 63 67 114  | R2R3 |
| 9P24180_001 | 14 63 67 114      | R2R3 | Mi_g031193 | 14 63 67 114  | R2R3 |
| 9P24560_001 | 14 63 67 114      | R2R3 | Mi_g008101 | 3 51 56 102   | R2R3 |
| 9P25110_001 | 13 54 58 105      | R2R3 | Mi_g002676 | 14 63 67 114  | R2R3 |

|                     |               |      |                        |               |      |
|---------------------|---------------|------|------------------------|---------------|------|
| 9P27380_001         | 15 63 67 114  | R2R3 | PDK_30s1024561g012_D4  | 14 63 67 114  | R2R3 |
| 9P28330_001         | 4 55 59 106   | R2R3 | Mi_g010294             | 14 63 68 138  | R2R3 |
| 9P28370_001         | 5 54 58 105   | R2R3 | Mi_g026448             | 4 55 59 100   | R2R3 |
| 9P29090_001         | 4 52 56 103   | R2R3 | PDK_30s1185931g007_D1  | 14 63 67 111  | R2R3 |
| 10P00660_001        | 36 84 108 157 | R2R3 | Mi_g018279             | 14 63 67 114  | R2R3 |
| Un_randomP00010_001 | 18 67 71 118  | R2R3 | Mi_g002872             | 11 59 116 165 | R2R3 |
| Un_randomP00040_001 | 14 63 67 114  | R2R3 | PDK_30s65509598g001_D2 | 15 64 68 115  | R2R3 |
| Un_randomP01280_001 | 26 74 79 125  | R2R3 | PDK_30s662981g002_D1   | 20 69 120 170 | R2R3 |
| Un_randomP02160_001 | 14 63 67 114  | R2R3 | PDK_30s704701g002_D5   | 14 74 78 125  | R2R3 |
| Un_randomP02890_001 | 14 63 67 114  | R2R3 | PDK_30s722171g012_D13  | 3 52 56 99    | R2R3 |
| Un_randomP07900_001 | 14 63 67 114  | R2R3 | Mi_g030747             | 14 63 67 114  | R2R3 |
| Un_randomP08600_001 | 18 67 71 114  | R2R3 | PDK_30s809821g005_D5   | 7 55 70 106   | R2R3 |
| Un_randomP11880_001 | 14 63 67 114  | R2R3 | Mi_g007512             | 14 63 67 114  | R2R3 |
| Un_randomP12700_001 | 14 63 67 114  | R2R3 | Mi_g014228             | 14 63 67 114  | R2R3 |
| Un_randomP15100_001 | 41 90 94 156  | R2R3 | PDK_30s844971g007_D4   | 14 63 67 114  | R2R3 |
| Un_randomP15560_001 | 15 64 68 115  | R2R3 | Mi_g000953             | 7 56 60 103   | R2R3 |
| Un_randomP16400_001 | 12 61 65 112  | R2R3 | Mi_g026602             | 4 55 59 106   | R2R3 |
| Un_randomP21080_001 | 22 71 75 122  | R2R3 | Mi_g031699             | 26 74 78 110  | R2R3 |

|                     |              |      |                |                 |      |
|---------------------|--------------|------|----------------|-----------------|------|
| Un_randomP27010_001 | 22 71 76 122 | R2R3 | 0P02160_001_D1 | 14 63 67 114    | R2R3 |
| Un_randomP28780_001 | 14 63 67 114 | R2R3 | 0P11880_001_D1 | 14 63 67 114    | R2R3 |
|                     |              |      | Mi_g020015     | 18 67 71 114    | R2R3 |
|                     |              |      | Mi_g015594     | 14 63 67 114    | R2R3 |
|                     |              |      | Mi_g026713     | 17 66 70 113    | R2R3 |
|                     |              |      | Mi_g032306     | 13 62 66 109    | R2R3 |
|                     |              |      | Mi_g002237     | 23 72 76 119    | R2R3 |
|                     |              |      | Mi_g028365     | 23 72 76 119    | R2R3 |
|                     |              |      | Mi_g018226     | 17 66 70 113    | R2R3 |
|                     |              |      | Mi_g029695     | 41 90 94 156    | R2R3 |
|                     |              |      | Mi_g031085     | 41 90 94 141    | R2R3 |
|                     |              |      | Mi_g026079     | 41 90 94 141    | R2R3 |
|                     |              |      | Mi_g003017     | 14 63 67 114    | R2R3 |
|                     |              |      | Mi_g002122     | 259 306 310 358 | R4   |
|                     |              |      |                | 364 411 416 460 |      |

<sup>a</sup>For clarity,the name of each gene were deleted by strings as "GSMUA\_Achr" for *Musa acuminata*

<sup>b</sup>.Consecutive pair of numbers denotes the start and stop position for each domain

<sup>c</sup>The gene names without header "Mi" were novel predicted gene by homology search against the MI genome assembly using trancription factors gene in other five speices and these genes were not in the final gene set.

**Supplementary Table 22.** Genome-wide duplication modes and ages MYB transcription gene family in *Musa acuminata*.

| Duplicate1 <sup>a</sup> | Location <sup>b</sup> | Duplicate1   | Location      | K <sub>s</sub> | K <sub>a</sub> | K <sub>a</sub> /K <sub>s</sub> | Mode      |
|-------------------------|-----------------------|--------------|---------------|----------------|----------------|--------------------------------|-----------|
| 10P01620_001            | ma10:3827267          | 10P01640_001 | ma10:3884919  | 0.08           | 0.09           | 0.89                           | proximal  |
| 9P27380_001             | ma9:31594796          | 9P27420_001  | ma9:31608916  | 0.43           | 0.09           | 4.78                           | proximal  |
| 0P07900_001             | ma0:32764662          | 1P23990_001  | ma1:18428968  | 0.18           | 0.6            | 0.3                            | segmental |
| 0P11880_001             | ma0:56765463          | 6P06800_001  | ma6:4618309   | 0.16           | 0.34           | 0.47                           | segmental |
| 1P17730_001             | ma1:13179687          | 10P06880_001 | ma10:17161933 | 0.16           | 0.6            | 0.27                           | segmental |
| 1P21020_001             | ma1:15824207          | 10P19840_001 | ma10:26059476 | 0.24           | 0.98           | 0.24                           | segmental |
| 1P03450_001             | ma1:2820599           | 11P02410_001 | ma11:1676890  | 0.2            | 0.82           | 0.24                           | segmental |
| 1P03470_001             | ma1:2830179           | 11P02420_001 | ma11:1680053  | 0.37           | 1.04           | 0.36                           | segmental |
| 1P07550_001             | ma1:5850917           | 11P07180_001 | ma11:5611190  | 0.17           | 0.6            | 0.28                           | segmental |
| 1P23990_001             | ma1:18428968          | 11P07850_001 | ma11:6130857  | 0.42           | 1.15           | 0.37                           | segmental |
| 1P21020_001             | ma1:15824207          | 11P13200_001 | ma11:13238633 | 0.14           | 0.43           | 0.33                           | segmental |
| 1P21020_001             | ma1:15824207          | 2P22640_001  | ma2:21653995  | 0.2            | 0.53           | 0.38                           | segmental |
| 1P09750_001             | ma1:7424574           | 3P13070_001  | ma3:9594136   | 0.31           | 0.7            | 0.44                           | segmental |
| 1P26140_001             | ma1:21161795          | 3P13070_001  | ma3:9594136   | 0.12           | 0.42           | 0.29                           | segmental |
| 1P02420_001             | ma1:1970933           | 4P25710_001  | ma4:25131531  | 0.29           | 0.84           | 0.35                           | segmental |
| 1P03140_001             | ma1:2527188           | 4P25260_001  | ma4:24842318  | 0.33           | 0.77           | 0.43                           | segmental |
| 1P18610_001             | ma1:13911762          | 4P19880_001  | ma4:20707286  | 0.14           | 0.64           | 0.22                           | segmental |
| 1P18990_001             | ma1:14167062          | 4P19560_001  | ma4:20495181  | 0.26           | 0.66           | 0.39                           | segmental |

|              |               |             |              |      |      |      |           |
|--------------|---------------|-------------|--------------|------|------|------|-----------|
| 1P04910_001  | ma1:4071302   | 4P01050_001 | ma4:862510   | 0.34 | 0.76 | 0.45 | segmental |
| 1P04910_001  | ma1:4071302   | 5P09280_001 | ma5:6729584  | 0.34 | 0.73 | 0.47 | segmental |
| 1P03140_001  | ma1:2527188   | 5P10690_001 | ma5:7656005  | 0.25 | 0.49 | 0.51 | segmental |
| 1P18610_001  | ma1:13911762  | 7P05680_001 | ma7:4228294  | 0.14 | 0.61 | 0.23 | segmental |
| 1P12470_001  | ma1:9547472   | 7P11320_001 | ma7:9028627  | 1.24 | 1.6  | 0.78 | segmental |
| 1P26520_001  | ma1:22105948  | 8P33900_001 | ma8:34821383 | 0.11 | 0.34 | 0.32 | segmental |
| 1P24960_001  | ma1:19356384  | 8P29910_001 | ma8:32136422 | 0.24 | 0.73 | 0.33 | segmental |
| 1P07550_001  | ma1:5850917   | 8P33900_001 | ma8:34821383 | 0.17 | 0.68 | 0.25 | segmental |
| 1P09750_001  | ma1:7424574   | 8P25220_001 | ma8:29114006 | 0.29 | 0.57 | 0.51 | segmental |
| 10P19840_001 | ma10:26059476 | 2P22640_001 | ma2:21653995 | 0.2  | 0.63 | 0.32 | segmental |
| 10P16010_001 | ma10:23714184 | 2P20600_001 | ma2:20400441 | 0.1  | 0.44 | 0.23 | segmental |
| 10P25700_001 | ma10:29594341 | 2P14770_001 | ma2:16399343 | 0.26 | 0.63 | 0.41 | segmental |
| 10P26730_001 | ma10:30151198 | 2P16200_001 | ma2:17204463 | 0.12 | 0.4  | 0.3  | segmental |
| 10P14840_001 | ma10:22957834 | 2P19880_001 | ma2:19858005 | 0.46 | 0.23 | 2    | segmental |
| 10P19130_001 | ma10:25624488 | 2P14770_001 | ma2:16399343 | 0.35 | 1.24 | 0.28 | segmental |
| 10P01620_001 | ma10:3827267  | 3P09450_001 | ma3:6828783  | 0.27 | 0.78 | 0.35 | segmental |
| 10P24560_001 | ma10:28968325 | 3P06470_001 | ma3:4384442  | 0.22 | 0.88 | 0.25 | segmental |
| 10P19130_001 | ma10:25624488 | 3P06470_001 | ma3:4384442  | 0.41 | 1.36 | 0.3  | segmental |
| 10P19840_001 | ma10:26059476 | 3P21060_001 | ma3:22092435 | 0.23 | 0.48 | 0.48 | segmental |
| 10P19970_001 | ma10:26139058 | 3P21000_001 | ma3:22054692 | 0.35 | 0.52 | 0.67 | segmental |
| 10P00660_001 | ma10:1222113  | 5P28940_001 | ma5:28883215 | 0.15 | 0.61 | 0.25 | segmental |
| 10P05080_001 | ma10:14706374 | 5P27750_001 | ma5:28208071 | 0.24 | 0.46 | 0.52 | segmental |



|              |               |             |              |      |      |      |           |
|--------------|---------------|-------------|--------------|------|------|------|-----------|
| 10P01620_001 | ma10:3827267  | 5P07720_001 | ma5:5537475  | 0.42 | 0.81 | 0.52 | segmental |
| 10P26610_001 | ma10:30090981 | 6P05030_001 | ma6:3422319  | 0.23 | 0.48 | 0.48 | segmental |
| 10P29680_001 | ma10:32111086 | 6P02550_001 | ma6:1664084  | 0.38 | 0.69 | 0.55 | segmental |
| 10P24560_001 | ma10:28968325 | 6P04130_001 | ma6:2832832  | 0.16 | 0.53 | 0.3  | segmental |
| 10P12830_001 | ma10:21711545 | 6P32250_001 | ma6:31729692 | 0.26 | 0.56 | 0.46 | segmental |
| 10P10800_001 | ma10:20485779 | 6P17630_001 | ma6:11864241 | 0.36 | 1.12 | 0.32 | segmental |
| 10P12830_001 | ma10:21711545 | 6P15900_001 | ma6:10625059 | 0.14 | 0.4  | 0.35 | segmental |
| 10P13520_001 | ma10:22118137 | 6P15370_001 | ma6:10243841 | 0.11 | 0.49 | 0.22 | segmental |
| 10P14030_001 | ma10:22432437 | 6P14840_001 | ma6:9832272  | 0.16 | 0.36 | 0.44 | segmental |
| 10P16010_001 | ma10:23714184 | 6P12930_001 | ma6:8670597  | 0.18 | 0.46 | 0.39 | segmental |
| 10P18880_001 | ma10:25439113 | 6P10650_001 | ma6:7080327  | 0.14 | 0.47 | 0.3  | segmental |
| 10P19840_001 | ma10:26059476 | 6P09760_001 | ma6:6572824  | 0.24 | 0.49 | 0.49 | segmental |
| 10P19970_001 | ma10:26139058 | 6P09620_001 | ma6:6502243  | 0.33 | 0.68 | 0.49 | segmental |
| 10P00770_001 | ma10:1381488  | 6P33700_001 | ma6:32639515 | 0.38 | 0.73 | 0.52 | segmental |
| 10P29680_001 | ma10:32111086 | 7P18410_001 | ma7:21208138 | 0.21 | 0.49 | 0.43 | segmental |
| 10P29970_001 | ma10:32275664 | 7P18680_001 | ma7:21462395 | 0.18 | 0.44 | 0.41 | segmental |
| 10P14030_001 | ma10:22432437 | 7P13700_001 | ma7:11012737 | 0.49 | 0.89 | 0.55 | segmental |
| 10P29210_001 | ma10:31806677 | 7P21670_001 | ma7:24419242 | 0.28 | 0.54 | 0.52 | segmental |
| 10P29280_001 | ma10:31868652 | 7P21550_001 | ma7:24292621 | 0.25 | 0.12 | 2.08 | segmental |
| 10P03710_001 | ma10:12019091 | 8P02640_001 | ma8:1876800  | 0.18 | 0.61 | 0.3  | segmental |
| 10P00660_001 | ma10:1222113  | 8P02380_001 | ma8:1735034  | 0.2  | 0.64 | 0.31 | segmental |
| 10P00770_001 | ma10:1381488  | 8P02290_001 | ma8:1678965  | 0.38 | 0.57 | 0.67 | segmental |

|              |               |              |               |      |      |      |           |
|--------------|---------------|--------------|---------------|------|------|------|-----------|
| 10P26730_001 | ma10:30151198 | 9P28370_001  | ma9:32408981  | 0.15 | 0.63 | 0.24 | segmental |
| 10P24560_001 | ma10:28968325 | 9P14850_001  | ma9:9719265   | 0.25 | 0.53 | 0.47 | segmental |
| 10P12830_001 | ma10:21711545 | 9P04990_001  | ma9:3240268   | 0.24 | 0.57 | 0.42 | segmental |
| 10P01620_001 | ma10:3827267  | 9P17050_001  | ma9:11583434  | 0.27 | 0.77 | 0.35 | segmental |
| 11P02420_001 | ma11:1680053  | 11P21360_001 | ma11:22014665 | 0.21 | 0.66 | 0.32 | segmental |
| 11P16130_001 | ma11:17834970 | 11P20830_001 | ma11:21701206 | 0.29 | 0.5  | 0.58 | segmental |
| 11P04470_001 | ma11:3350433  | 11P21020_001 | ma11:21812151 | 0.34 | 2.63 | 0.13 | segmental |
| 11P04930_001 | ma11:3696160  | 11P20830_001 | ma11:21701206 | 0.24 | 0.58 | 0.41 | segmental |
| 11P07660_001 | ma11:5940648  | 2P04200_001  | ma2:9661223   | 0.17 | 0.43 | 0.4  | segmental |
| 11P17870_001 | ma11:19406677 | 2P18090_001  | ma2:18516616  | 0.3  | 0.96 | 0.31 | segmental |
| 11P23500_001 | ma11:23380329 | 2P17960_001  | ma2:18414859  | 0.24 | 0.83 | 0.29 | segmental |
| 11P17870_001 | ma11:19406677 | 5P03520_001  | ma5:2445891   | 0.39 | 1.35 | 0.29 | segmental |
| 11P03140_001 | ma11:2260846  | 5P10440_001  | ma5:7457562   | 0.11 | 0.72 | 0.15 | segmental |
| 11P24690_001 | ma11:24116060 | 5P28350_001  | ma5:28589027  | 0.22 | 0.6  | 0.37 | segmental |
| 11P26520_001 | ma11:25333770 | 5P25730_001  | ma5:26664437  | 0.23 | 0.79 | 0.29 | segmental |
| 11P20830_001 | ma11:21701206 | 5P21090_001  | ma5:23001338  | 0.17 | 0.31 | 0.55 | segmental |
| 11P21020_001 | ma11:21812151 | 5P20940_001  | ma5:22833763  | 0.32 | 1.59 | 0.2  | segmental |
| 11P22790_001 | ma11:22957333 | 5P18600_001  | ma5:20088661  | 1.51 | 2.34 | 0.65 | segmental |
| 11P23430_001 | ma11:23320590 | 5P18080_001  | ma5:19380625  | 0.16 | 0.41 | 0.39 | segmental |
| 11P02420_001 | ma11:1680053  | 5P20480_001  | ma5:22257736  | 0.17 | 0.56 | 0.3  | segmental |
| 11P25100_001 | ma11:24340132 | 6P32250_001  | ma6:31729692  | 0.25 | 0.36 | 0.69 | segmental |
| 11P10490_001 | ma11:8300707  | 7P21740_001  | ma7:24438808  | 0.95 | 0.31 | 3.06 | segmental |

|              |               |             |              |      |      |      |           |
|--------------|---------------|-------------|--------------|------|------|------|-----------|
| 11P01660_001 | ma11:1124949  | 8P13660_001 | ma8:10400849 | 0.11 | 0.34 | 0.32 | segmental |
| 11P20830_001 | ma11:21701206 | 8P10800_001 | ma8:7738326  | 0.31 | 0.5  | 0.62 | segmental |
| 11P16130_001 | ma11:17834970 | 8P10800_001 | ma8:7738326  | 0.23 | 0.52 | 0.44 | segmental |
| 11P02410_001 | ma11:1676890  | 8P12710_001 | ma8:9475867  | 0.1  | 0.42 | 0.24 | segmental |
| 11P03450_001 | ma11:2490827  | 8P11800_001 | ma8:8540654  | 0.08 | 0.26 | 0.31 | segmental |
| 11P04930_001 | ma11:3696160  | 8P10800_001 | ma8:7738326  | 0.2  | 0.61 | 0.33 | segmental |
| 11P23500_001 | ma11:23380329 | 8P14540_001 | ma8:11897078 | 0.35 | 1.07 | 0.33 | segmental |
| 2P22640_001  | ma2:21653995  | 3P21060_001 | ma3:22092435 | 0.22 | 0.61 | 0.36 | segmental |
| 2P22640_001  | ma2:21653995  | 3P01370_001 | ma3:977749   | 0.13 | 0.22 | 0.59 | segmental |
| 2P13930_001  | ma2:15867063  | 4P23690_001 | ma4:23700942 | 0.27 | 0.71 | 0.38 | segmental |
| 2P11450_001  | ma2:14323124  | 4P29410_001 | ma4:27377433 | 0.18 | 0.51 | 0.35 | segmental |
| 2P19380_001  | ma2:19474985  | 5P06530_001 | ma5:4800837  | 0.24 | 0.33 | 0.73 | segmental |
| 2P22010_001  | ma2:21258919  | 6P10700_001 | ma6:7121789  | 0.15 | 0.6  | 0.25 | segmental |
| 2P22640_001  | ma2:21653995  | 6P09760_001 | ma6:6572824  | 0.26 | 0.56 | 0.46 | segmental |
| 2P20600_001  | ma2:20400441  | 6P12930_001 | ma6:8670597  | 0.12 | 0.45 | 0.27 | segmental |
| 2P19380_001  | ma2:19474985  | 7P13700_001 | ma7:11012737 | 0.43 | 0.64 | 0.67 | segmental |
| 2P17960_001  | ma2:18414859  | 8P14540_001 | ma8:11897078 | 0.32 | 0.9  | 0.36 | segmental |
| 2P22640_001  | ma2:21653995  | 8P18460_001 | ma8:22616986 | 0.19 | 0.7  | 0.27 | segmental |
| 2P16200_001  | ma2:17204463  | 9P28370_001 | ma9:32408981 | 0.17 | 0.75 | 0.23 | segmental |
| 3P28540_001  | ma3:27792238  | 4P06410_001 | ma4:4867671  | 0.22 | 0.58 | 0.38 | segmental |
| 3P12200_001  | ma3:9048575   | 4P19560_001 | ma4:20495181 | 0.25 | 0.5  | 0.5  | segmental |
| 3P12730_001  | ma3:9430861   | 4P19990_001 | ma4:20777825 | 0.2  | 0.51 | 0.39 | segmental |

|             |              |             |              |      |      |      |           |
|-------------|--------------|-------------|--------------|------|------|------|-----------|
| 3P13070_001 | ma3:9594136  | 4P20150_001 | ma4:20875824 | 0.16 | 0.53 | 0.3  | segmental |
| 3P22200_001 | ma3:23097441 | 5P26000_001 | ma5:26945773 | 0.18 | 0.56 | 0.32 | segmental |
| 3P09450_001 | ma3:6828783  | 5P07720_001 | ma5:5537475  | 0.24 | 0.59 | 0.41 | segmental |
| 3P21000_001 | ma3:22054692 | 6P09620_001 | ma6:6502243  | 0.27 | 0.39 | 0.69 | segmental |
| 3P21060_001 | ma3:22092435 | 6P09760_001 | ma6:6572824  | 0.23 | 0.65 | 0.35 | segmental |
| 3P19490_001 | ma3:20857458 | 6P06490_001 | ma6:4374465  | 0.36 | 0.72 | 0.5  | segmental |
| 3P07940_001 | ma3:5521762  | 8P22690_001 | ma8:27268546 | 0.21 | 0.79 | 0.27 | segmental |
| 3P21060_001 | ma3:22092435 | 8P18460_001 | ma8:22616986 | 0.18 | 0.45 | 0.4  | segmental |
| 3P06470_001 | ma3:4384442  | 9P14850_001 | ma9:9719265  | 0.21 | 0.45 | 0.47 | segmental |
| 3P07940_001 | ma3:5521762  | 9P16040_001 | ma9:10751627 | 0.17 | 0.58 | 0.29 | segmental |
| 3P08370_001 | ma3:5939949  | 9P16640_001 | ma9:11293677 | 0.45 | 0.71 | 0.63 | segmental |
| 3P28230_001 | ma3:27580987 | 9P22600_001 | ma9:27709017 | 0.32 | 0.76 | 0.42 | segmental |
| 3P28540_001 | ma3:27792238 | 9P22190_001 | ma9:27319716 | 0.17 | 0.52 | 0.33 | segmental |
| 3P09450_001 | ma3:6828783  | 9P17050_001 | ma9:11583434 | 0.17 | 0.5  | 0.34 | segmental |
| 3P09490_001 | ma3:6873436  | 9P17000_001 | ma9:11543943 | 0.14 | 0.33 | 0.42 | segmental |
| 3P07700_001 | ma3:5311517  | 9P15750_001 | ma9:10441720 | 0.17 | 0.78 | 0.22 | segmental |
| 3P16490_001 | ma3:17842513 | 9P08480_001 | ma9:5431915  | 0.28 | 0.94 | 0.3  | segmental |
| 4P05410_001 | ma4:4187540  | 4P11960_001 | ma4:8728787  | 0.24 | 0.52 | 0.46 | segmental |
| 4P06410_001 | ma4:4867671  | 4P13280_001 | ma4:9890136  | 0.14 | 0.49 | 0.29 | segmental |
| 4P25340_001 | ma4:24901615 | 4P29410_001 | ma4:27377433 | 0.22 | 0.37 | 0.59 | segmental |
| 4P03800_001 | ma4:3023347  | 4P06410_001 | ma4:4867671  | 0.66 | 0.43 | 1.53 | segmental |
| 4P27350_001 | ma4:26219201 | 5P03520_001 | ma5:2445891  | 0.2  | 0.69 | 0.29 | segmental |

|             |              |             |              |      |      |      |           |
|-------------|--------------|-------------|--------------|------|------|------|-----------|
| 4P25260_001 | ma4:24842318 | 5P10690_001 | ma5:7656005  | 0.29 | 0.63 | 0.46 | segmental |
| 4P32240_001 | ma4:29087072 | 5P01930_001 | ma5:1183911  | 0.2  | 0.48 | 0.42 | segmental |
| 4P21910_001 | ma4:22303702 | 5P03920_001 | ma5:2760556  | 0.21 | 0.62 | 0.34 | segmental |
| 4P32240_001 | ma4:29087072 | 6P31740_001 | ma6:31431932 | 0.36 | 0.98 | 0.37 | segmental |
| 4P27730_001 | ma4:26467154 | 7P00280_001 | ma7:246110   | 0.38 | 0.61 | 0.62 | segmental |
| 4P23690_001 | ma4:23700942 | 7P00280_001 | ma7:246110   | 0.16 | 0.48 | 0.33 | segmental |
| 4P19880_001 | ma4:20707286 | 7P05680_001 | ma7:4228294  | 0.13 | 0.46 | 0.28 | segmental |
| 4P00480_001 | ma4:365369   | 7P21010_001 | ma7:23930895 | 0.17 | 0.52 | 0.33 | segmental |
| 4P09450_001 | ma4:6860442  | 8P25220_001 | ma8:29114006 | 0.23 | 0.47 | 0.49 | segmental |
| 4P13280_001 | ma4:9890136  | 9P22190_001 | ma9:27319716 | 0.16 | 0.55 | 0.29 | segmental |
| 5P22760_001 | ma5:24681383 | 6P01850_001 | ma6:1204556  | 0.15 | 0.38 | 0.39 | segmental |
| 5P23240_001 | ma5:25024020 | 6P02550_001 | ma6:1664084  | 0.21 | 0.52 | 0.4  | segmental |
| 5P23290_001 | ma5:25055605 | 6P02580_001 | ma6:1686852  | 0.27 | 0.53 | 0.51 | segmental |
| 5P27750_001 | ma5:28208071 | 6P32250_001 | ma6:31729692 | 0.18 | 0.48 | 0.38 | segmental |
| 5P28780_001 | ma5:28794485 | 6P33470_001 | ma6:32493021 | 0.14 | 0.17 | 0.82 | segmental |
| 5P21840_001 | ma5:23977741 | 6P30830_001 | ma6:30793406 | 0.2  | 0.39 | 0.51 | segmental |
| 5P28940_001 | ma5:28883215 | 6P33620_001 | ma6:32593456 | 0.22 | 0.98 | 0.22 | segmental |
| 5P17010_001 | ma5:15785888 | 6P07260_001 | ma6:4881251  | 0.21 | 0.45 | 0.47 | segmental |
| 5P01930_001 | ma5:1183911  | 6P31740_001 | ma6:31431932 | 0.34 | 0.77 | 0.44 | segmental |
| 5P27750_001 | ma5:28208071 | 6P15900_001 | ma6:10625059 | 0.3  | 0.89 | 0.34 | segmental |
| 5P06530_001 | ma5:4800837  | 7P13700_001 | ma7:11012737 | 0.48 | 0.57 | 0.84 | segmental |
| 5P23110_001 | ma5:24947461 | 7P18680_001 | ma7:21462395 | 0.17 | 0.47 | 0.36 | segmental |

|             |              |             |              |      |      |      |           |
|-------------|--------------|-------------|--------------|------|------|------|-----------|
| 5P23240_001 | ma5:25024020 | 7P18410_001 | ma7:21208138 | 0.11 | 0.63 | 0.17 | segmental |
| 5P23290_001 | ma5:25055605 | 7P18390_001 | ma7:21181466 | 0.37 | 0.63 | 0.59 | segmental |
| 5P22760_001 | ma5:24681383 | 7P19530_001 | ma7:22316984 | 0.19 | 0.6  | 0.32 | segmental |
| 5P28940_001 | ma5:28883215 | 8P02370_001 | ma8:1731834  | 0.2  | 0.52 | 0.38 | segmental |
| 5P22760_001 | ma5:24681383 | 8P24780_001 | ma8:28831601 | 0.22 | 0.49 | 0.45 | segmental |
| 5P21090_001 | ma5:23001338 | 8P10800_001 | ma8:7738326  | 0.14 | 0.4  | 0.35 | segmental |
| 5P21250_001 | ma5:23271254 | 8P10470_001 | ma8:7453357  | 0.19 | 0.73 | 0.26 | segmental |
| 5P05910_001 | ma5:4409346  | 9P15640_001 | ma9:10341287 | 0.2  | 0.72 | 0.28 | segmental |
| 5P07720_001 | ma5:5537475  | 9P17050_001 | ma9:11583434 | 0.2  | 0.47 | 0.43 | segmental |
| 5P01930_001 | ma5:1183911  | 9P09790_001 | ma9:6315751  | 0.31 | 0.73 | 0.42 | segmental |
| 5P27750_001 | ma5:28208071 | 9P04990_001 | ma9:3240268  | 0.22 | 0.52 | 0.42 | segmental |
| 5P28780_001 | ma5:28794485 | 9P03720_001 | ma9:2564190  | 0.8  | 1.29 | 0.62 | segmental |
| 5P29070_001 | ma5:28955095 | 9P03320_001 | ma9:2317111  | 0.26 | 0.29 | 0.9  | segmental |
| 6P01850_001 | ma6:1204556  | 7P19530_001 | ma7:22316984 | 0.17 | 0.56 | 0.3  | segmental |
| 6P02530_001 | ma6:1646480  | 7P18550_001 | ma7:21322148 | 0.29 | 0.5  | 0.58 | segmental |
| 6P02550_001 | ma6:1664084  | 7P18410_001 | ma7:21208138 | 0.27 | 0.59 | 0.46 | segmental |
| 6P02580_001 | ma6:1686852  | 7P18390_001 | ma7:21181466 | 0.36 | 0.8  | 0.45 | segmental |
| 6P02690_001 | ma6:1746525  | 7P18080_001 | ma7:20896774 | 0.24 | 0.66 | 0.36 | segmental |
| 6P05030_001 | ma6:3422319  | 7P10520_001 | ma7:8469177  | 0.33 | 0.18 | 1.83 | segmental |
| 6P14840_001 | ma6:9832272  | 7P13700_001 | ma7:11012737 | 0.52 | 0.97 | 0.54 | segmental |
| 6P33620_001 | ma6:32593456 | 8P02260_001 | ma8:1656100  | 0.35 | 0.63 | 0.56 | segmental |
| 6P33700_001 | ma6:32639515 | 8P02290_001 | ma8:1678965  | 0.37 | 0.71 | 0.52 | segmental |

|              |              |              |              |      |      |      |            |
|--------------|--------------|--------------|--------------|------|------|------|------------|
| 6P27290_001  | ma6:27836929 | 9P07000_001  | ma9:4396755  | NA   | NA   | NA   | segmental  |
| 6P25420_001  | ma6:26510462 | 9P08600_001  | ma9:5530063  | 0.13 | 0.39 | 0.33 | segmental  |
| 6P32250_001  | ma6:31729692 | 9P04990_001  | ma9:3240268  | 0.17 | 0.42 | 0.4  | segmental  |
| 6P32970_001  | ma6:32156680 | 9P04400_001  | ma9:2930622  | 0.18 | 0.49 | 0.37 | segmental  |
| 6P33470_001  | ma6:32493021 | 9P03720_001  | ma9:2564190  | 1.53 | 1.73 | 0.88 | segmental  |
| 6P31410_001  | ma6:31212076 | 9P10150_001  | ma9:6524734  | 0.15 | 0.36 | 0.42 | segmental  |
| 6P31740_001  | ma6:31431932 | 9P09790_001  | ma9:6315751  | 0.23 | 0.47 | 0.49 | segmental  |
| 6P29310_001  | ma6:29578336 | 9P12180_001  | ma9:7955715  | 0.21 | 0.63 | 0.33 | segmental  |
| 6P32250_001  | ma6:31729692 | 9P17000_001  | ma9:11543943 | 0.26 | 0.57 | 0.46 | segmental  |
| 7P19530_001  | ma7:22316984 | 8P24780_001  | ma8:28831601 | 0.23 | 0.68 | 0.34 | segmental  |
| 7P10550_001  | ma7:8483769  | 9P28330_001  | ma9:32378337 | 0.15 | 0.63 | 0.24 | segmental  |
| 7P18680_001  | ma7:21462395 | 9P15640_001  | ma9:10341287 | 0.23 | 0.81 | 0.28 | segmental  |
| 8P03510_001  | ma8:2402421  | 9P11190_001  | ma9:7282803  | 0.15 | 0.49 | 0.31 | segmental  |
| 8P22690_001  | ma8:27268546 | 9P16040_001  | ma9:10751627 | 0.23 | 0.78 | 0.29 | segmental  |
| 8P03510_001  | ma8:2402421  | 9P25100_001  | ma9:29693387 | 0.79 | 0.34 | 2.32 | segmental  |
| 9P12180_001  | ma9:7955715  | 9P24560_001  | ma9:29318237 | 0.35 | 0.57 | 0.61 | segmental  |
| 11P09170_001 | ma11:7079110 | 11P09180_001 | ma11:7085790 | 1.52 | 0.25 | 6.08 | tandem     |
| 3P07940_001  | ma3:5521762  | 3P07950_001  | ma3:5529381  | 0.44 | 1.75 | 0.25 | tandem     |
| 7P18550_001  | ma7:21322148 | 7P18560_001  | ma7:21326915 | 0.37 | 1.09 | 0.34 | tandem     |
| 8P02370_001  | ma8:1731834  | 8P02380_001  | ma8:1735034  | 0.17 | 0.28 | 0.61 | tandem     |
| 9P25100_001  | ma9:29693387 | 9P25110_001  | ma9:29699940 | 0.7  | 0.23 | 3.04 | tandem     |
| 0P00010_001  | ma0:5911     | 8P29910_001  | ma8:32136422 | 0.49 | 0.92 | 0.53 | transposed |

|              |               |              |               |      |      |      |            |
|--------------|---------------|--------------|---------------|------|------|------|------------|
| 0P01280_001  | ma0:4240224   | 9P22600_001  | ma9:27709017  | 0.37 | 0.89 | 0.42 | transposed |
| 0P02160_001  | ma0:10079858  | 7P21010_001  | ma7:23930895  | 0.45 | 1.51 | 0.3  | transposed |
| 0P02890_001  | ma0:14335878  | 11P23430_001 | ma11:23320590 | 0.49 | 1.2  | 0.41 | transposed |
| 0P04880_001  | ma0:19257049  | 8P02260_001  | ma8:1656100   | 0.56 | 1.51 | 0.37 | transposed |
| 0P05930_001  | ma0:25461097  | 7P21550_001  | ma7:24292621  | 0.46 | 0.4  | 1.15 | transposed |
| 0P08600_001  | ma0:39288889  | 8P10800_001  | ma8:7738326   | 0.22 | 0.56 | 0.39 | transposed |
| 0P10790_001  | ma0:52550469  | 11P07660_001 | ma11:5940648  | 0.23 | 0.46 | 0.5  | transposed |
| 0P12700_001  | ma0:60970282  | 9P27380_001  | ma9:31594796  | 0.63 | 1.71 | 0.37 | transposed |
| 0P15100_001  | ma0:71214440  | 10P29280_001 | ma10:31868652 | 0.33 | 0.5  | 0.66 | transposed |
| 0P15560_001  | ma0:73673346  | 3P06470_001  | ma3:4384442   | 0.27 | 1.03 | 0.26 | transposed |
| 0P16400_001  | ma0:77590851  | 3P21000_001  | ma3:22054692  | 0.18 | 0.54 | 0.33 | transposed |
| 0P16400_001  | ma0:77590851  | 9P24180_001  | ma9:28998002  | 0.31 | 1.04 | 0.3  | transposed |
| 0P18640_001  | ma0:89403099  | 7P10520_001  | ma7:8469177   | 1.57 | 1.41 | 1.11 | transposed |
| 0P19120_001  | ma0:91767882  | 2P04730_001  | ma2:10035776  | 0.59 | 0.37 | 1.59 | transposed |
| 0P21080_001  | ma0:102480920 | 6P35800_001  | ma6:33924613  | 0.69 | 1.97 | 0.35 | transposed |
| 0P21080_001  | ma0:102480920 | 8P31350_001  | ma8:33047459  | 0.21 | 0.82 | 0.26 | transposed |
| 0P21150_001  | ma0:103035185 | 5P07380_001  | ma5:5309335   | 0.44 | 0.63 | 0.7  | transposed |
| 0P21150_001  | ma0:103035185 | 9P22600_001  | ma9:27709017  | 0.64 | 0.84 | 0.76 | transposed |
| 0P22350_001  | ma0:109329376 | 9P22190_001  | ma9:27319716  | 0.26 | 0.62 | 0.42 | transposed |
| 0P27010_001  | ma0:132135986 | 8P29910_001  | ma8:32136422  | 0.26 | 0.82 | 0.32 | transposed |
| 0P28780_001  | ma0:139549853 | 6P07260_001  | ma6:4881251   | 0.09 | 0.43 | 0.21 | transposed |
| 10P04250_001 | ma10:13791652 | 11P26520_001 | ma11:25333770 | 0.22 | 0.78 | 0.28 | transposed |



|              |               |              |               |      |      |      |            |
|--------------|---------------|--------------|---------------|------|------|------|------------|
| 10P04590_001 | ma10:14224803 | 2P20600_001  | ma2:20400441  | 0.28 | 0.58 | 0.48 | transposed |
| 10P08070_001 | ma10:18092917 | 9P11190_001  | ma9:7282803   | 0.73 | 1.41 | 0.52 | transposed |
| 10P08350_001 | ma10:18359986 | 5P01930_001  | ma5:1183911   | 0.32 | 0.78 | 0.41 | transposed |
| 10P17610_001 | ma10:24759638 | 3P07940_001  | ma3:5521762   | 0.6  | 1.57 | 0.38 | transposed |
| 11P00410_001 | ma11:238132   | 11P22820_001 | ma11:22972764 | 0.37 | 0.82 | 0.45 | transposed |
| 11P04090_001 | ma11:2997742  | 6P04130_001  | ma6:2832832   | 0.7  | 1.39 | 0.5  | transposed |
| 11P07550_001 | ma11:5887956  | 11P04080_001 | ma11:2992016  | 0.41 | 1.14 | 0.36 | transposed |
| 11P09110_001 | ma11:7039899  | 6P19410_001  | ma6:13697491  | 0.14 | 0.55 | 0.25 | transposed |
| 11P09160_001 | ma11:7075580  | 5P27750_001  | ma5:28208071  | 0.54 | 1.49 | 0.36 | transposed |
| 11P13080_001 | ma11:12858603 | 7P21010_001  | ma7:23930895  | 0.51 | 1.28 | 0.4  | transposed |
| 11P13790_001 | ma11:14824831 | 7P21740_001  | ma7:24438808  | 1.3  | 1.2  | 1.08 | transposed |
| 11P15910_001 | ma11:17592155 | 11P00430_001 | ma11:259223   | 0.33 | 0.55 | 0.6  | transposed |
| 11P17150_001 | ma11:18825848 | 1P06510_001  | ma1:5193504   | 0.35 | 0.8  | 0.44 | transposed |
| 11P17190_001 | ma11:18859717 | 8P12710_001  | ma8:9475867   | 0.19 | 0.71 | 0.27 | transposed |
| 11P17730_001 | ma11:19301622 | 3P12610_001  | ma3:9339168   | 0.2  | 1.02 | 0.2  | transposed |
| 11P26140_001 | ma11:25024790 | 10P28340_001 | ma10:31192481 | 0.63 | 2.92 | 0.22 | transposed |
| 1P09180_001  | ma1:7027537   | 5P03920_001  | ma5:2760556   | 0.41 | 1.73 | 0.24 | transposed |
| 1P17150_001  | ma1:12797871  | 10P29280_001 | ma10:31868652 | 0.23 | 0.46 | 0.5  | transposed |
| 1P17150_001  | ma1:12797871  | 7P02510_001  | ma7:1980771   | 0.47 | 0.66 | 0.71 | transposed |
| 1P17480_001  | ma1:13006455  | 4P11960_001  | ma4:8728787   | 0.4  | 0.88 | 0.45 | transposed |
| 1P22380_001  | ma1:16850209  | 10P29970_001 | ma10:32275664 | 0.23 | 0.83 | 0.28 | transposed |
| 1P27270_001  | ma1:23895634  | 8P29910_001  | ma8:32136422  | 0.49 | 1.21 | 0.4  | transposed |

|             |              |              |               |      |      |      |            |
|-------------|--------------|--------------|---------------|------|------|------|------------|
| 2P01830_001 | ma2:7701667  | 1P18990_001  | ma1:14167062  | 0.32 | 0.81 | 0.4  | transposed |
| 2P02970_001 | ma2:8708443  | 3P06470_001  | ma3:4384442   | 0.57 | 1.53 | 0.37 | transposed |
| 2P03880_001 | ma2:9453094  | 7P10520_001  | ma7:8469177   | NA   | NA   | NA   | transposed |
| 2P04730_001 | ma2:10035776 | 11P23430_001 | ma11:23320590 | 0.47 | 1.49 | 0.32 | transposed |
| 2P07780_001 | ma2:12087173 | 1P25120_001  | ma1:19553840  | 0.76 | 1.45 | 0.52 | transposed |
| 2P19890_001 | ma2:19864656 | 10P26610_001 | ma10:30090981 | 0.81 | 0.81 | 1    | transposed |
| 3P09050_001 | ma3:6536827  | 3P19490_001  | ma3:20857458  | 0.4  | 0.88 | 0.45 | transposed |
| 3P10060_001 | ma3:7278997  | 6P29310_001  | ma6:29578336  | 0.79 | 2.65 | 0.3  | transposed |
| 3P13920_001 | ma3:13050078 | 8P02380_001  | ma8:1735034   | 0.92 | 2.34 | 0.39 | transposed |
| 3P18970_001 | ma3:20354812 | 9P08480_001  | ma9:5431915   | 0.36 | 1.18 | 0.31 | transposed |
| 3P24580_001 | ma3:25066979 | 1P18990_001  | ma1:14167062  | 0.3  | 0.97 | 0.31 | transposed |
| 3P27700_001 | ma3:27206568 | 8P22690_001  | ma8:27268546  | NA   | NA   | NA   | transposed |
| 4P06340_001 | ma4:4796268  | 11P02420_001 | ma11:1680053  | NA   | NA   | NA   | transposed |
| 4P16900_001 | ma4:15506891 | 11P23990_001 | ma11:23683457 | 1.23 | 0.59 | 2.08 | transposed |
| 4P18180_001 | ma4:18816135 | 5P18600_001  | ma5:20088661  | 0.2  | 0.45 | 0.44 | transposed |
| 4P19030_001 | ma4:20118750 | 11P23430_001 | ma11:23320590 | 0.32 | 1.23 | 0.26 | transposed |
| 4P21700_001 | ma4:22113988 | 11P23500_001 | ma11:23380329 | 0.42 | 1.56 | 0.27 | transposed |
| 4P24510_001 | ma4:24280662 | 9P07000_001  | ma9:4396755   | 1.41 | 0.5  | 2.82 | transposed |
| 4P28090_001 | ma4:26633991 | 5P01930_001  | ma5:1183911   | 0.2  | 0.5  | 0.4  | transposed |
| 4P28850_001 | ma4:27084708 | 5P03520_001  | ma5:2445891   | 0.4  | 1.15 | 0.35 | transposed |
| 4P29230_001 | ma4:27282657 | 8P12710_001  | ma8:9475867   | 0.24 | 0.64 | 0.38 | transposed |
| 5P01180_001 | ma5:678774   | 6P07260_001  | ma6:4881251   | 0.29 | 0.61 | 0.48 | transposed |

|             |              |              |               |      |      |      |            |
|-------------|--------------|--------------|---------------|------|------|------|------------|
| 5P07380_001 | ma5:5309335  | 6P33470_001  | ma6:32493021  | 1.94 | 1.62 | 1.2  | transposed |
| 5P14600_001 | ma5:10539751 | 5P03920_001  | ma5:2760556   | 0.24 | 0.63 | 0.38 | transposed |
| 5P15730_001 | ma5:11951295 | 7P19530_001  | ma7:22316984  | 1.36 | 0.51 | 2.67 | transposed |
| 5P22410_001 | ma5:24497053 | 10P29680_001 | ma10:32111086 | 0.46 | 0.41 | 1.12 | transposed |
| 6P04400_001 | ma6:3004586  | 9P27380_001  | ma9:31594796  | 0.23 | 0.84 | 0.27 | transposed |
| 6P31520_001 | ma6:31267214 | 5P03520_001  | ma5:2445891   | 0.45 | 1.4  | 0.32 | transposed |
| 7P02510_001 | ma7:1980771  | 10P29280_001 | ma10:31868652 | 0.52 | 0.53 | 0.98 | transposed |
| 7P05570_001 | ma7:4142609  | 8P10800_001  | ma8:7738326   | 0.41 | 1.23 | 0.33 | transposed |
| 7P08150_001 | ma7:6094819  | 5P22760_001  | ma5:24681383  | 0.5  | 2.85 | 0.18 | transposed |
| 7P18200_001 | ma7:20997754 | 10P26730_001 | ma10:30151198 | 0.34 | 0.95 | 0.36 | transposed |
| 7P21560_001 | ma7:24305018 | 10P29280_001 | ma10:31868652 | 0.25 | 0.22 | 1.14 | transposed |
| 7P25060_001 | ma7:26860985 | 4P01050_001  | ma4:862510    | 0.4  | 0.92 | 0.43 | transposed |
| 8P01400_001 | ma8:1175893  | 7P21010_001  | ma7:23930895  | 0.39 | 1.14 | 0.34 | transposed |
| 8P01930_001 | ma8:1438932  | 9P22600_001  | ma9:27709017  | 0.61 | 0.91 | 0.67 | transposed |
| 8P05290_001 | ma8:3439354  | 11P04910_001 | ma11:3686976  | NA   | NA   | NA   | transposed |
| 8P11810_001 | ma8:8552080  | 11P03450_001 | ma11:2490827  | 0.3  | 0.29 | 1.03 | transposed |
| 8P16920_001 | ma8:14980756 | 2P22010_001  | ma2:21258919  | 0.17 | 0.18 | 0.94 | transposed |
| 8P25970_001 | ma8:29688201 | 4P01050_001  | ma4:862510    | 0.61 | 0.59 | 1.03 | transposed |
| 8P31350_001 | ma8:33047459 | 1P25120_001  | ma1:19553840  | 0.72 | 1.33 | 0.54 | transposed |
| 8P34340_001 | ma8:35236263 | 10P03710_001 | ma10:12019091 | 0.33 | 0.96 | 0.34 | transposed |
| 9P10160_001 | ma9:6535135  | 6P31410_001  | ma6:31212076  | 1.82 | 0.9  | 2.02 | transposed |
| 9P19380_001 | ma9:20003709 | 9P28330_001  | ma9:32378337  | 0.46 | 1.24 | 0.37 | transposed |

|             |              |              |              |      |      |      |            |
|-------------|--------------|--------------|--------------|------|------|------|------------|
| 9P20620_001 | ma9:24755344 | 1P17730_001  | ma1:13179687 | 0.15 | 0.66 | 0.23 | transposed |
| 9P21870_001 | ma9:27003360 | 1P17730_001  | ma1:13179687 | 0.39 | 1.95 | 0.2  | transposed |
| 9P23340_001 | ma9:28198983 | 2P03880_001  | ma2:9453094  | NA   | NA   | NA   | transposed |
| 9P23340_001 | ma9:28198983 | 7P10520_001  | ma7:8469177  | 1.57 | 1.79 | 0.88 | transposed |
| 9P23760_001 | ma9:28602350 | 1P17730_001  | ma1:13179687 | 0.16 | 0.86 | 0.19 | transposed |
| 9P24180_001 | ma9:28998002 | 1P26520_001  | ma1:22105948 | 0.14 | 0.56 | 0.25 | transposed |
| 9P28160_001 | ma9:32239521 | 11P01660_001 | ma11:1124949 | 1.25 | 2.27 | 0.55 | transposed |
| 9P29090_001 | ma9:32857364 | 7P11320_001  | ma7:9028627  | NA   | NA   | NA   | transposed |

<sup>a</sup>The name of *Musa acuminata* duplicated genes were abbreviated and indicated by letter 'P', and corresponding chromosomes also abbreviated as 'ma';

<sup>b</sup>The location referred to the first site of alignment on the chromosomes of *Musa acuminata* respectively

**Supplementary Table 23** Genome-wide duplication modes and ages of MYB transcription gene family in *Musa itinerans*.

| Duplicate1 | Location <sup>a</sup> | Duplicate1 | Location     | Ks   | Ka   | Ka/Ks | Mode      |
|------------|-----------------------|------------|--------------|------|------|-------|-----------|
| Mi_g026023 | mi8:23959678          | Mi_g022486 | mi8:23997594 | 0.16 | 0.65 | 0.24  | proximal  |
| Mi_g006834 | mi7:4531089           | Mi_g006832 | mi7:4539660  | 0    | 0    | 0     | proximal  |
| Mi_g019853 | mi1:2923201           | Mi_g020932 | mi1:2174609  | 0.19 | 0.79 | 0.24  | segmental |
| Mi_g009692 | mi1:2615701           | Mi_g030276 | mi4:21624024 | 0.21 | 0.75 | 0.28  | segmental |
| Mi_g019853 | mi1:2923201           | Mi_g029097 | mi4:24185146 | 0.21 | 0.46 | 0.46  | segmental |
| Mi_g015962 | mi1:4172748           | Mi_g009254 | mi4:1006715  | 0.31 | 0.74 | 0.41  | segmental |
| Mi_g008101 | mi1:8040677           | Mi_g010968 | mi4:10844301 | 0.32 | 0.73 | 0.44  | segmental |
| Mi_g015962 | mi1:4172748           | Mi_g030664 | mi5:6933931  | 0.09 | 0.19 | 0.45  | segmental |
| Mi_g009692 | mi1:2615701           | Mi_g000872 | mi5:7972037  | 0.21 | 0.46 | 0.45  | segmental |
| Mi_g019853 | mi1:2923201           | Mi_g002140 | mi8:10088354 | 0.19 | 0.55 | 0.35  | segmental |
| Mi_g011352 | mi10:11976710         | Mi_g008186 | mi2:14623575 | 0.15 | 0.57 | 0.27  | segmental |
| Mi_g012174 | mi10:18347951         | Mi_g009075 | mi2:10204791 | 1.07 | 1.52 | 0.7   | segmental |
| Mi_g016283 | mi10:13989619         | Mi_g009075 | mi2:10204791 | 1.15 | 1    | 1.14  | segmental |
| Mi_g008837 | mi10:17573538         | Mi_g011643 | mi3:4741460  | 0.16 | 0.6  | 0.26  | segmental |
| Mi_g016283 | mi10:13989619         | Mi_g011643 | mi3:4741460  | 0.34 | 1.16 | 0.29  | segmental |
| Mi_g026784 | mi10:9935168          | Mi_g006425 | mi6:11620634 | 0.12 | 0.39 | 0.3   | segmental |
| Mi_g015857 | mi10:10658394         | Mi_g007998 | mi6:10616573 | 0.16 | 0.32 | 0.49  | segmental |
| Mi_g016259 | mi10:13791068         | Mi_g019039 | mi6:7845398  | 0.14 | 0.44 | 0.32  | segmental |

|            |               |            |               |      |      |      |           |
|------------|---------------|------------|---------------|------|------|------|-----------|
| Mi_g017415 | mil0:934502   | Mi_g004323 | mi6:27312708  | 0.31 | 0.71 | 0.44 | segmental |
| Mi_g026115 | mil0:20945633 | Mi_g013025 | mi7:15326570  | 0.09 | 0.28 | 0.32 | segmental |
| Mi_g026137 | mil0:21140177 | Mi_g013052 | mi7:15554307  | 0.17 | 0.45 | 0.38 | segmental |
| Mi_g015857 | mil0:10658394 | Mi_g007343 | mi7:11525363  | 0.06 | 0.23 | 0.25 | segmental |
| Mi_g029930 | mil0:18849928 | Mi_g001538 | mi7:8628712   | 0.18 | 0.22 | 0.82 | segmental |
| Mi_g016052 | mil0:20664649 | Mi_g023833 | mi7:17931842  | 0.34 | 0.73 | 0.47 | segmental |
| Mi_g026079 | mil0:20693875 | Mi_g007855 | mi7:17851925  | 0.36 | 0.13 | 2.67 | segmental |
| Mi_g016607 | mil0:859170   | Mi_g031627 | mi8:2010146   | 0.23 | 0.36 | 0.64 | segmental |
| Mi_g017415 | mil0:934502   | Mi_g031709 | mi8:1935643   | 0.39 | 0.68 | 0.57 | segmental |
| Mi_g008837 | mil0:17573538 | Mi_g031193 | mi9:10525472  | 0.1  | 0.65 | 0.15 | segmental |
| Mi_g016283 | mil0:13989619 | Mi_g031193 | mi9:10525472  | 0.19 | 0.77 | 0.24 | segmental |
| Mi_g026137 | mil0:21140177 | Mi_g010260 | mi9:11221247  | 0.2  | 0.72 | 0.28 | segmental |
| Mi_g024178 | mil1:13903673 | Mi_g012944 | mi11:17692660 | 0.22 | 0.46 | 0.48 | segmental |
| Mi_g026713 | mil1:4118960  | Mi_g012944 | mi11:17692660 | 0.24 | 0.58 | 0.41 | segmental |
| Mi_g000673 | mil1:6383105  | Mi_g008629 | mi2:3308069   | 0.05 | 0.16 | 0.31 | segmental |
| Mi_g013106 | mil1:15337792 | Mi_g011505 | mi2:12374106  | 0.26 | 0.58 | 0.45 | segmental |
| Mi_g018396 | mil1:19557350 | Mi_g011516 | mi2:12263600  | 0.09 | 0.38 | 0.23 | segmental |
| Mi_g018353 | mil1:7768542  | Mi_g006597 | mi2:15307155  | 0.12 | 0.49 | 0.25 | segmental |
| Mi_g012944 | mil1:17692660 | Mi_g021826 | mi4:7544613   | 0.07 | 0.26 | 0.28 | segmental |
| Mi_g013106 | mil1:15337792 | Mi_g025517 | mi5:1951773   | 0.38 | 1.42 | 0.27 | segmental |
| Mi_g016435 | mil1:20396468 | Mi_g005086 | mi5:24027298  | 0.29 | 0.64 | 0.45 | segmental |

|            |               |            |              |      |      |      |           |
|------------|---------------|------------|--------------|------|------|------|-----------|
| Mi_g003265 | mi11:19469450 | Mi_g004164 | mi5:14940268 | 0.11 | 0.29 | 0.38 | segmental |
| Mi_g017949 | mi11:8782261  | Mi_g023839 | mi7:17954246 | 1.65 | 0.31 | 5.26 | segmental |
| Mi_g012944 | mi11:17692660 | Mi_g028365 | mi8:8188380  | 0.29 | 0.52 | 0.55 | segmental |
| Mi_g008382 | mi11:1209382  | Mi_g000576 | mi8:10982834 | 0.11 | 0.36 | 0.3  | segmental |
| Mi_g024178 | mi11:13903673 | Mi_g028365 | mi8:8188380  | 0.19 | 0.48 | 0.39 | segmental |
| Mi_g020932 | mi11:2174609  | Mi_g002140 | mi8:10088354 | 0.11 | 0.26 | 0.42 | segmental |
| Mi_g018396 | mi11:19557350 | Mi_g032408 | mi8:11654421 | 0.11 | 0.41 | 0.28 | segmental |
| Mi_g006597 | mi2:15307155  | Mi_g021090 | mi3:1430597  | 0.09 | 0.44 | 0.19 | segmental |
| Mi_g013325 | mi2:9627690   | Mi_g012524 | mi4:20374634 | 0.28 | 0.63 | 0.44 | segmental |
| Mi_g023573 | mi2:7978043   | Mi_g018991 | mi4:24296918 | 0.21 | 0.59 | 0.35 | segmental |
| Mi_g005722 | mi2:15925203  | Mi_g015986 | mi6:6906503  | 0.23 | 0.45 | 0.52 | segmental |
| Mi_g013325 | mi2:9627690   | Mi_g012626 | mi7:224100   | 0.35 | 0.6  | 0.59 | segmental |
| Mi_g011516 | mi2:12263600  | Mi_g032408 | mi8:11654421 | 0.3  | 0.74 | 0.41 | segmental |
| Mi_g023815 | mi3:18164105  | Mi_g026681 | mi5:22272500 | 0.14 | 0.43 | 0.33 | segmental |
| Mi_g005585 | mi3:7372820   | Mi_g024243 | mi5:23651737 | 0.27 | 0.7  | 0.38 | segmental |
| Mi_g024573 | mi3:15984915  | Mi_g007720 | mi6:4621333  | 2.24 | 1.32 | 1.7  | segmental |
| Mi_g029488 | mi3:5903872   | Mi_g013038 | mi7:15430410 | 0.45 | 1.48 | 0.3  | segmental |
| Mi_g029488 | mi3:5903872   | Mi_g015554 | mi8:17772344 | 0.21 | 0.71 | 0.29 | segmental |
| Mi_g011643 | mi3:4741460   | Mi_g031193 | mi9:10525472 | 0.11 | 0.23 | 0.49 | segmental |
| Mi_g005585 | mi3:7372820   | Mi_g012547 | mi9:12095183 | 0.12 | 0.2  | 0.62 | segmental |
| Mi_g005585 | mi3:7372820   | Mi_g009786 | mi9:3461480  | 0.25 | 0.7  | 0.36 | segmental |

|            |              |            |              |      |      |      |           |
|------------|--------------|------------|--------------|------|------|------|-----------|
| Mi_g029471 | mi3:5703873  | Mi_g014953 | mi9:11347997 | 0.17 | 0.67 | 0.25 | segmental |
| Mi_g001931 | mi4:23032506 | Mi_g025517 | mi5:1951773  | 0.26 | 0.6  | 0.44 | segmental |
| Mi_g030276 | mi4:21624024 | Mi_g000872 | mi5:7972037  | 0.2  | 0.59 | 0.33 | segmental |
| Mi_g020623 | mi4:25952754 | Mi_g003787 | mi5:1143055  | 0.21 | 0.46 | 0.46 | segmental |
| Mi_g008708 | mi4:18781489 | Mi_g025554 | mi5:2349713  | 0.15 | 0.51 | 0.3  | segmental |
| Mi_g020623 | mi4:25952754 | Mi_g002791 | mi6:25555493 | 0.36 | 0.78 | 0.47 | segmental |
| Mi_g012524 | mi4:20374634 | Mi_g012626 | mi7:224100   | 0.17 | 0.51 | 0.33 | segmental |
| Mi_g021826 | mi4:7544613  | Mi_g028365 | mi8:8188380  | 0.1  | 0.32 | 0.32 | segmental |
| Mi_g010968 | mi4:10844301 | Mi_g007661 | mi9:16429117 | 0.41 | 0.77 | 0.53 | segmental |
| Mi_g010269 | mi5:19846589 | Mi_g023093 | mi6:1317584  | 0.14 | 0.38 | 0.37 | segmental |
| Mi_g021008 | mi5:20252585 | Mi_g022053 | mi6:1758744  | 0.24 | 0.51 | 0.47 | segmental |
| Mi_g024243 | mi5:23651737 | Mi_g021477 | mi6:25855352 | 0.21 | 0.56 | 0.36 | segmental |
| Mi_g003787 | mi5:1143055  | Mi_g002791 | mi6:25555493 | 0.37 | 0.72 | 0.52 | segmental |
| Mi_g024243 | mi5:23651737 | Mi_g006425 | mi6:11620634 | 0.23 | 0.64 | 0.37 | segmental |
| Mi_g021008 | mi5:20252585 | Mi_g013023 | mi7:15304512 | 0.34 | 0.56 | 0.61 | segmental |
| Mi_g025663 | mi5:5810722  | Mi_g023833 | mi7:17931842 | 0.36 | 1.15 | 0.32 | segmental |
| Mi_g025663 | mi5:5810722  | Mi_g012551 | mi9:12178451 | 0.19 | 0.55 | 0.35 | segmental |
| Mi_g026681 | mi5:22272500 | Mi_g001779 | mi9:5988156  | 0.28 | 0.79 | 0.36 | segmental |
| Mi_g005112 | mi5:24240498 | Mi_g026489 | mi9:2776800  | 0.66 | 1.04 | 0.64 | segmental |
| Mi_g005137 | mi5:24410333 | Mi_g026448 | mi9:2484854  | 0.11 | 0.3  | 0.36 | segmental |
| Mi_g015986 | mi6:6906503  | Mi_g009970 | mi6:7197336  | 0.16 | 0.49 | 0.33 | segmental |



|            |              |            |               |      |      |      |            |
|------------|--------------|------------|---------------|------|------|------|------------|
| Mi_g006425 | mi6:11620634 | Mi_g021477 | mi6:25855352  | 0.24 | 0.61 | 0.4  | segmental  |
| Mi_g022049 | mi6:1712968  | Mi_g013038 | mi7:15430410  | 0.22 | 0.37 | 0.61 | segmental  |
| Mi_g022051 | mi6:1731674  | Mi_g013025 | mi7:15326570  | 0.04 | 0.28 | 0.15 | segmental  |
| Mi_g022053 | mi6:1758744  | Mi_g013023 | mi7:15304512  | 0.2  | 0.45 | 0.45 | segmental  |
| Mi_g007998 | mi6:10616573 | Mi_g007343 | mi7:11525363  | 0.07 | 0.22 | 0.3  | segmental  |
| Mi_g004323 | mi6:27312708 | Mi_g031709 | mi8:1935643   | 0.36 | 0.81 | 0.45 | segmental  |
| Mi_g020057 | mi6:21840169 | Mi_g005961 | mi9:4696768   | NA   | NA   | NA   | segmental  |
| Mi_g027225 | mi6:23625086 | Mi_g008329 | mi9:18061682  | 0.14 | 0.54 | 0.26 | segmental  |
| Mi_g019901 | mi6:20440835 | Mi_g001779 | mi9:5988156   | 0.15 | 0.39 | 0.37 | segmental  |
| Mi_g021477 | mi6:25855352 | Mi_g009786 | mi9:3461480   | 0.15 | 0.39 | 0.39 | segmental  |
| Mi_g021425 | mi6:26333171 | Mi_g026546 | mi9:3120282   | 0.18 | 0.51 | 0.34 | segmental  |
| Mi_g020828 | mi6:25343407 | Mi_g002122 | mi9:6941395   | 0.11 | 0.33 | 0.32 | segmental  |
| Mi_g002791 | mi6:25555493 | Mi_g012470 | mi9:6747271   | 0.22 | 0.38 | 0.6  | segmental  |
| Mi_g007849 | mi9:7701948  | Mi_g022821 | mi9:18407935  | 0.17 | 0.57 | 0.29 | segmental  |
| Mi_g022486 | mi8:23997594 | Mi_g022485 | mi8:24004883  | 0    | 0.02 | 0.14 | tandem     |
| Mi_g008709 | mi4:18784060 | Mi_g008710 | mi4:18786352  | 0    | 0    | NA   | tandem     |
| Mi_g008708 | mi4:18781489 | Mi_g008709 | mi4:18784060  | 0    | 0    | NA   | tandem     |
| Mi_g013038 | mi7:15430410 | Mi_g013039 | mi7:15434725  | 0.33 | 0.98 | 0.33 | tandem     |
| Mi_g031627 | mi8:2010146  | Mi_g031628 | mi8:2013899   | 0.17 | 0.29 | 0.6  | tandem     |
| Mi_g023815 | mi3:18164105 | Mi_g023814 | mi3:18170762  | 0    | 0    | 0    | tandem     |
| Mi_g015594 | mi0:122808   | Mi_g024178 | mi11:13903673 | 0.09 | 0.43 | 0.21 | transposed |

|            |               |            |               |      |      |      |            |
|------------|---------------|------------|---------------|------|------|------|------------|
| Mi_g012341 | mi6:27047886  | Mi_g001538 | mi7:8628712   | 1.67 | 1.51 | 1.1  | transposed |
| Mi_g000908 | mi10:255366   | Mi_g031711 | mi8:1909382   | 0.36 | 0.88 | 0.4  | transposed |
| Mi_g017225 | mi10:13102386 | Mi_g029488 | mi3:5903872   | 0.57 | 1.7  | 0.33 | transposed |
| Mi_g017225 | mi10:13102386 | Mi_g010355 | mi9:20391316  | 0.41 | 1.18 | 0.34 | transposed |
| Mi_g007232 | mi11:7556780  | Mi_g022053 | mi6:1758744   | 0.37 | 0.92 | 0.41 | transposed |
| Mi_g005370 | mi11:11370632 | Mi_g012944 | mi11:17692660 | 0.6  | 1.91 | 0.31 | transposed |
| Mi_g005338 | mi11:11785350 | Mi_g023839 | mi7:17954246  | NA   | NA   | NA   | transposed |
| Mi_g031532 | mi11:14664361 | Mi_g019853 | mi1:2923201   | 0.3  | 0.81 | 0.38 | transposed |
| Mi_g010941 | mi9:17747983  | Mi_g000967 | mi3:9857540   | 0.16 | 1.13 | 0.15 | transposed |
| Mi_g010316 | mi1:10486724  | Mi_g017465 | mi7:9258956   | 1.18 | 1.39 | 0.85 | transposed |
| Mi_g010316 | mi1:10486724  | Mi_g006597 | mi2:15307155  | 1.28 | 2.05 | 0.62 | transposed |
| Mi_g022835 | mi1:22663937  | Mi_g002237 | mi8:22931823  | 0.48 | 1.24 | 0.39 | transposed |
| Mi_g008651 | mi2:3072072   | Mi_g029930 | mi10:18849928 | 0.4  | 0.59 | 0.67 | transposed |
| Mi_g028414 | mi8:8730115   | Mi_g020049 | mi4:10061016  | 0.41 | 2.09 | 0.2  | transposed |
| Mi_g031056 | mi1:14148975  | Mi_g023573 | mi2:7978043   | 0.23 | 0.5  | 0.47 | transposed |
| Mi_g029523 | mi3:6353211   | Mi_g002237 | mi8:22931823  | 0.51 | 0.97 | 0.52 | transposed |
| Mi_g005621 | mi3:7020580   | Mi_g007720 | mi6:4621333   | 2.18 | 1.38 | 1.59 | transposed |
| Mi_g005533 | mi3:7778217   | Mi_g011643 | mi3:4741460   | 0.9  | 1.63 | 0.55 | transposed |
| Mi_g005645 | mi3:6819975   | Mi_g007720 | mi6:4621333   | NA   | NA   | NA   | transposed |
| Mi_g009976 | mi6:7058708   | Mi_g019901 | mi6:20440835  | 0.44 | 0.88 | 0.49 | transposed |
| Mi_g024042 | mi3:20135850  | Mi_g027475 | mi3:9565584   | 0.31 | 0.78 | 0.4  | transposed |

|            |              |            |               |      |      |      |            |
|------------|--------------|------------|---------------|------|------|------|------------|
| Mi_g019328 | mi3:22458865 | Mi_g015554 | mi8:17772344  | 0.59 | 3.27 | 0.18 | transposed |
| Mi_g031735 | mi8:1645834  | Mi_g007661 | mi9:16429117  | 0.49 | 0.78 | 0.63 | transposed |
| Mi_g001029 | mi4:7969381  | Mi_g004953 | mi3:10197232  | 0.31 | 0.8  | 0.39 | transposed |
| Mi_g008865 | mi4:16700867 | Mi_g003265 | mi11:19469450 | 0.32 | 1.19 | 0.27 | transposed |
| Mi_g030561 | mi1:19908345 | Mi_g003265 | mi11:19469450 | 0.43 | 1.56 | 0.28 | transposed |
| Mi_g000657 | mi0:5211248  | Mi_g008865 | mi4:16700867  | 0.43 | 1.64 | 0.26 | transposed |
| Mi_g000657 | mi0:5211248  | Mi_g003265 | mi11:19469450 | 0.49 | 1.41 | 0.35 | transposed |
| Mi_g016970 | mi0:2003723  | Mi_g003265 | mi11:19469450 | 0.34 | 0.88 | 0.39 | transposed |
| Mi_g016970 | mi0:2003723  | Mi_g030561 | mi1:19908345  | 0.2  | 0.46 | 0.44 | transposed |
| Mi_g009559 | mi2:3681062  | Mi_g003265 | mi11:19469450 | 0.26 | 0.7  | 0.37 | transposed |
| Mi_g008694 | mi4:18602224 | Mi_g032408 | mi8:11654421  | 0.35 | 1.26 | 0.28 | transposed |
| Mi_g018597 | mi7:6581440  | Mi_g003787 | mi5:1143055   | 0.19 | 0.67 | 0.28 | transposed |
| Mi_g029851 | mi10:6619113 | Mi_g003787 | mi5:1143055   | 0.32 | 0.88 | 0.36 | transposed |
| Mi_g023340 | mi11:328232  | Mi_g025554 | mi5:2349713   | 0.28 | 1.76 | 0.16 | transposed |
| Mi_g003034 | mi6:3165444  | Mi_g015554 | mi8:17772344  | 0.54 | 1.39 | 0.39 | transposed |
| Mi_g010355 | mi9:20391316 | Mi_g029488 | mi3:5903872   | 0.52 | 1.77 | 0.29 | transposed |
| Mi_g014262 | mi6:4873899  | Mi_g028484 | mi7:10376079  | 0.45 | 1.1  | 0.41 | transposed |
| Mi_g014574 | mi10:8484141 | Mi_g005585 | mi3:7372820   | 0.61 | 1.73 | 0.35 | transposed |
| Mi_g006309 | mi2:2174562  | Mi_g008329 | mi9:18061682  | 0.3  | 1.25 | 0.24 | transposed |
| Mi_g027397 | mi10:3717910 | Mi_g021477 | mi6:25855352  | 0.18 | 0.4  | 0.46 | transposed |
| Mi_g007306 | mi10:6328467 | Mi_g008562 | mi6:29589580  | 0.24 | 1    | 0.24 | transposed |

|            |              |            |               |      |      |      |            |
|------------|--------------|------------|---------------|------|------|------|------------|
| Mi_g012642 | mi7:387891   | Mi_g032170 | mi1:3017287   | 1.69 | 1.73 | 0.98 | transposed |
| Mi_g029390 | mi7:2063769  | Mi_g012524 | mi4:20374634  | 0.9  | 1.59 | 0.56 | transposed |
| Mi_g029386 | mi7:2121979  | Mi_g023839 | mi7:17954246  | NA   | NA   | NA   | transposed |
| Mi_g017465 | mi7:9258956  | Mi_g021090 | mi3:1430597   | 0.2  | 0.7  | 0.29 | transposed |
| Mi_g031010 | mi7:15143966 | Mi_g031435 | mi2:11047508  | 0.31 | 1.22 | 0.26 | transposed |
| Mi_g026997 | mi8:19143224 | Mi_g023093 | mi6:1317584   | 0.23 | 0.54 | 0.43 | transposed |
| Mi_g017587 | mi6:24855615 | Mi_g005275 | mi9:9743648   | 0.36 | 1.14 | 0.31 | transposed |
| Mi_g028992 | mi7:20586062 | Mi_g009254 | mi4:1006715   | 0.35 | 0.76 | 0.46 | transposed |
| Mi_g016662 | mi1:3186783  | Mi_g015962 | mi1:4172748   | 0    | 0    | NA   | transposed |
| Mi_g020129 | mi1:7480272  | Mi_g031711 | mi8:1909382   | 0.54 | 1.12 | 0.48 | transposed |
| Mi_g017837 | mi8:2204598  | Mi_g015904 | mi10:10346092 | 0.34 | 1.26 | 0.27 | transposed |
| Mi_g028070 | mi5:18104270 | Mi_g001779 | mi9:5988156   | 0.74 | 1.83 | 0.41 | transposed |
| Mi_g004604 | mi0:3142605  | Mi_g021090 | mi3:1430597   | 1.93 | 0.91 | 2.13 | transposed |
| Mi_g021391 | mi6:26662188 | Mi_g029488 | mi3:5903872   | 0.19 | 0.62 | 0.3  | transposed |
| Mi_g026899 | mi8:20063186 | Mi_g010269 | mi5:19846589  | 0.85 | 1.01 | 0.84 | transposed |
| Mi_g028617 | mi8:26314389 | Mi_g031435 | mi2:11047508  | 0.22 | 0.72 | 0.31 | transposed |
| Mi_g001320 | mi10:2931102 | Mi_g008186 | mi2:14623575  | 0.13 | 0.57 | 0.22 | transposed |
| Mi_g005795 | mi9:14634899 | Mi_g016194 | mi1:14372746  | 0.11 | 0.8  | 0.13 | transposed |
| Mi_g005795 | mi9:14634899 | Mi_g019547 | mi9:17320121  | 0.13 | 0.8  | 0.16 | transposed |
| Mi_g020867 | mi9:16885152 | Mi_g016259 | mi10:13791068 | 2.71 | 0.65 | 4.16 | transposed |
| Mi_g019547 | mi9:17320121 | Mi_g002872 | mi10:5275271  | 0.14 | 0.89 | 0.16 | transposed |

|            |              |            |              |      |      |      |            |
|------------|--------------|------------|--------------|------|------|------|------------|
| Mi_g005844 | mi9:20962772 | Mi_g008382 | mi11:1209382 | 1.18 | 2.03 | 0.58 | transposed |
| Mi_g005856 | mi9:21138735 | Mi_g005137 | mi5:24410333 | 0.2  | 0.48 | 0.41 | transposed |
| Mi_g001537 | mi7:8642666  | Mi_g026448 | mi9:2484854  | 0.13 | 0.89 | 0.14 | transposed |
| Mi_g006673 | mi9:21747979 | Mi_g014953 | mi9:11347997 | 0.4  | 1.76 | 0.23 | transposed |
| Mi_g003850 | mi5:594008   | Mi_g008186 | mi2:14623575 | 0.12 | 0.58 | 0.21 | transposed |
| Mi_g010294 | mi5:19635296 | Mi_g013025 | mi7:15326570 | 0.76 | 1.16 | 0.66 | transposed |
| Mi_g014228 | mi6:5176608  | Mi_g019901 | mi6:20440835 | 0.21 | 0.87 | 0.24 | transposed |
| Mi_g031699 | mi2:13990664 | Mi_g001538 | mi7:8628712  | NA   | NA   | NA   | transposed |

<sup>a</sup>The location referred to the first site of alignment on the chromosomes of *Musa itinerans* respectively
